# 1 **Covalent Disruptor of YAP-TEAD Association Suppresses Defective Hippo** 2 **Signaling**

3 **Authors:** Mengyang Fan<sup>1,2,4,10</sup>, Wenchao Lu<sup>1,2,3,10</sup>, Jianwei Che<sup>1,2</sup>, Nicholas Kwiatkowski<sup>1,2</sup>,  
4 Yang Gao<sup>1,2</sup>, Hyuk-Soo Seo<sup>1,2</sup>, Scott B. Ficarro<sup>1,5</sup>, Prafulla C. Gokhale<sup>6</sup>, Yao Liu<sup>1,2</sup>, Ezekiel  
5 A. Geffken<sup>1</sup>, Jimit Lakhani<sup>1</sup>, Kijun Song<sup>1</sup>, Miljan Kuljanin<sup>7,8</sup>, Wenzhi Ji<sup>1,2,3</sup>, Jie Jiang<sup>1,2</sup>,  
6 Zhixiang He<sup>1,2</sup>, Jason Tse<sup>3</sup>, Andrew S. Boghossian<sup>9</sup>, Matthew G. Rees<sup>9</sup>, Melissa M. Ronan<sup>9</sup>,  
7 Jennifer A. Roth<sup>9</sup>, Joseph D. Mancias<sup>8</sup>, Jarrod A. Marto<sup>1,5</sup>, Sirano Dhe-Paganon<sup>1,2</sup>, Tinghu  
8 Zhang<sup>1,2,3\*</sup>, Nathanael S. Gray<sup>1,2,3\*</sup>.

9 <sup>1</sup>Department of Cancer Biology, Dana-Farber Cancer Institute, Harvard Medical School,  
10 Boston, MA 02215, USA

11 <sup>2</sup>Department of Biological Chemistry and Molecular Pharmacology, Harvard Medical  
12 School, Boston, MA 02215, USA

13 <sup>3</sup>Department of Chemical and Systems Biology, ChEM-H, Stanford Cancer Institute, School  
14 of Medicine, Stanford University, Stanford, CA 94305, USA

15 <sup>4</sup>Hangzhou Institute of Medicine (HIM), Chinese Academy of Sciences, Hangzhou, Zhejiang  
16 310022, China

17 <sup>5</sup>Blais Proteomics Center, Dana-Farber Cancer Institute, Harvard Medical School, Boston,  
18 MA 02215, USA

19 <sup>6</sup>Experimental Therapeutics Core, Dana-Farber Cancer Institute, Boston, MA 02215, USA

20 <sup>7</sup>Department of Cell Biology, Harvard Medical School, Boston, MA 02215, USA

21 <sup>8</sup>Division of Radiation and Genome Stability, Department of Radiation Oncology, Dana-  
22 Farber Cancer Institute, Harvard Medical School, Boston, MA 02215, USA

23 <sup>9</sup>Broad Institute of MIT and Harvard, Cambridge, MA 02142, USA

24 <sup>10</sup>These authors contributed equally to this work

25 Correspondence should be addressed to T.H.Z. ([ztinghu8@stanford.edu](mailto:ztinghu8@stanford.edu)) and N.S.G.  
26 ([nsgray01@stanford.edu](mailto:nsgray01@stanford.edu)).

27

28 *Keywords:* covalent fragment, transcription factor, YAP, TEAD, palmitoylation,

29 mesothelioma

## 30 **Abstract**

31 The transcription factor TEAD, together with its coactivator YAP/TAZ, is a key transcriptional  
32 modulator of the Hippo pathway. Activation of TEAD transcription by YAP has been implicated in a  
33 number of malignancies, and this complex represents a promising target for drug discovery. However,  
34 both YAP and its extensive binding interfaces to TEAD have been difficult to address using small  
35 molecules, mainly due to a lack of druggable pockets. TEAD is post-translationally modified by  
36 palmitoylation that targets a conserved cysteine at a central pocket, which provides an opportunity to  
37 develop cysteine-directed covalent small molecules for TEAD inhibition. Here, we employed covalent  
38 fragment screening approach followed by structure-based design to develop an irreversible TEAD  
39 inhibitor MYF-03-69. Using a range of *in vitro* and cell-based assays we demonstrated that through a  
40 covalent binding with TEAD palmitate pocket, MYF-03-69 disrupts YAP-TEAD association,  
41 suppresses TEAD transcriptional activity and inhibits cell growth of Hippo signaling defective  
42 malignant pleural mesothelioma (MPM). Further, a cell viability screening with a panel of 903 cancer  
43 cell lines indicated a high correlation between TEAD-YAP dependency and the sensitivity to MYF-  
44 03-69. Transcription profiling identified the upregulation of proapoptotic *BMF* gene in cancer cells  
45 that are sensitive to TEAD inhibition. Further optimization of MYF-03-69 led to an *in vivo*  
46 compatible compound MYF-03-176, which shows strong antitumor efficacy in MPM mouse  
47 xenograft model via oral administration. Taken together, we disclosed a story of the development of  
48 covalent TEAD inhibitors and its high therapeutic potential for clinic treatment for the cancers that are  
49 driven by TEAD-YAP alteration.

## 50 **Introduction**

51 The Hippo pathway is a highly conserved signaling pathway that regulates embryonic development,  
52 organ size, cell proliferation, tissue regeneration, homeostasis and is responsible for the development  
53 and progression of many malignancies<sup>1</sup>. Critical components of Hippo signaling pathway are TEAD  
54 transcription factors, that are present as a family of four highly homologous members (TEAD1-4) in  
55 mammals. Importantly, TEADs alone show minimal transcriptional activity and require binding with  
56 a coactivator YAP/TAZ to initiate efficient gene expression<sup>2</sup>. YAP has been well characterized as an

57 oncoprotein<sup>3</sup> and its tumorigenesis role is mostly associated with TEAD mediated YAP-dependent  
58 gene expression<sup>4</sup>. Tissue-specific deletion of the upstream regulators or overexpression of YAP itself  
59 results in hyperplasia, organ overgrowth and tumorigenesis<sup>5</sup>. Tumor suppressor Merlin, encoded by  
60 *NF2* gene, and kinase LATS1/2 are known upstream regulators that cooperatively promote  
61 phosphorylation of YAP and hence induce its retention and degradation in the cytoplasm<sup>6</sup>. However,  
62 loss of function mutations in *NF2* or *LATS1/2*, which occurs in >70% mesothelioma, promote YAP  
63 nuclear entry and binding with TEAD to drive oncogenesis<sup>7</sup>. In addition to mesothelioma, high level  
64 of nuclear YAP has been associated with poor prognosis in non-small cell lung cancer (NSCLC),  
65 pancreatic cancer, and colorectal cancer (CRC)<sup>3a</sup>. Moreover, there is evidence to suggest that  
66 activation of the YAP-TEAD transcriptional program can be involved with drug resistance<sup>8</sup>. For  
67 example, *ALK*-rearranged lung cancer cells were shown to survive the treatment of ALK inhibitor  
68 alectinib through YAP1 activation<sup>9</sup>. In EGFR-mutant lung cancers, YAP-TEAD was observed to  
69 promote cell survival and induce a dormant state upon EGFR signaling blockade<sup>10</sup>. Taken together,  
70 targeting YAP-TEAD has emerged as a promising therapeutic strategy for cancer treatment.

71 Over the decades, efforts to directly target YAP/TAZ-TEAD have focused on either designing  
72 peptide-mimicking agents that bind in the interface between YAP and TEAD and disrupt this  
73 interaction or using phenotypic screening to identify small molecules that inhibit YAP-dependent  
74 signaling<sup>11</sup>. For example, a cyclic YAP-like peptide has been developed as a potent disruptor of YAP-  
75 TEAD complex in cell lysates but failed to exert effects in cells due to poor cellular permeability<sup>12</sup>.  
76 Recently, TEAD stability and the association with YAP protein was shown to be regulated by *S*-  
77 palmitoylation, a post-translational modification on a conserved cysteine located within the palmitate  
78 binding pocket (PBP) on YAP binding domain (YBD) of TEAD<sup>13</sup>. This finding led to the discovery of  
79 several small molecules: flufenamic acid (FA)<sup>14</sup>, MGH-CP1<sup>15</sup>, compound 2<sup>16</sup> and VT101~107<sup>17</sup>, that  
80 reversibly bind TEAD PBP (**Figure S1**). Additionally, inspired by thioester formation of the  
81 conserved cysteine with palmitate, covalent TEAD inhibitors TED-347<sup>18</sup>, DC-TEADin02<sup>19</sup> and K-  
82 975<sup>20</sup> (**Figure S1**) have also been designed. TED-347 and DC-TEADin02 covalently bind with TEAD  
83 using a highly electrophilic chloromethyl ketone and vinyl sulfonamide warhead. In comparison, a

84 less electrophilic arylamide warhead is used in the design of K-975, which shows a potent cellular and  
85 *in vivo* activity in mouse tumor models albeit employing a high dose. Although these compounds have  
86 adequately demonstrated that the palmitoylated cysteine is targetable, none of them are optimized  
87 compounds and the structure-activity study for each of these scaffolds has not been disclosed. We  
88 have previously reported MYF-01-37 which possesses a less electrophilic warhead compared to K-  
89 975 as a covalent TEAD inhibitor and demonstrated its utility to blunt the transcriptional adaptation in  
90 mutant EGFR-dependent NSCLC cells<sup>10</sup>. However, MYF-01-37 is a sub-optimal chemical probe  
91 which requires micromolar concentrations in cellular assays and displays poor pharmacokinetic  
92 properties.

93 Development of covalent chemical probes and drugs has experienced a revival in recent years  
94 resulting in a deluge of new modality targeting a range of cancer-relevant targets, such as KRAS<sup>G12C</sup>,  
95 EGFR, BTK, JAK3 and others<sup>21</sup>. The conventional approach to develop a covalent inhibitor is using a  
96 structure-guided design to equip a pre-existing reversible binder with an electrophile to target a  
97 nucleophilic residue on the target protein, most typically a cysteine. Alternatively, a recently  
98 developed approach involves screening a library of low molecular weight electrophilic fragments  
99 followed by medicinal chemical optimization<sup>22</sup>. Here, we used such screening approach to identify the  
100 lead covalent fragment MYF-01-37. Subsequent structure-based design to engage a side pocket  
101 resulted in development of a more potent covalent TEAD inhibitor MYF-03-69, which inhibits the  
102 palmitoylation process of all four TEAD paralogs *in vitro*, disassociates the endogenous YAP-TEAD  
103 complex, downregulates YAP-dependent target gene expression, and preferentially impairs the  
104 proliferation of mesothelioma cells that exhibit defects in Hippo signaling. A comprehensive screen  
105 against 903 cancer cell lines<sup>23</sup> identified more YAP-TEAD dependent cells as sensitive to MYF-03-69  
106 in addition to mesothelioma. Transcription profiling suggests that the upregulation of Bcl-2 modifying  
107 factor (*BMF*) gene correlated with antiproliferative response to TEAD inhibition. Further, *in vivo*  
108 pharmacological effect was achieved with orally bioavailable compound MYF-03-176, indicating a  
109 promising lead for therapy of cancers driven by Hippo signaling dysfunction.

## 110 **Results**

### 111 **Covalent fragment screening identified MYF-01-37 as a covalent TEAD binder**

112 To screen for a covalent lead compound for TEAD, we first assembled a biased covalent fragment  
113 library that was developed based on the flufenamic acid template and a cysteine-reactive acrylamide  
114 warhead<sup>24</sup> (**Figure 1a, Figure S2a**). We then conducted a medium-throughput screen of this library  
115 using mass spectrometry (MS) to detect protein-fragment adduct formation with recombinant, purified  
116 TEAD2 YBD protein. MYF-01-37 was identified as the fragment capable of efficient labeling while  
117 the majority of the fragment library failed to label the protein (**Figure S2b**). Next, the protein labeled  
118 with MYF-01-37 was proteolytically digested and the resultant peptides were analyzed using tandem  
119 mass spectrometry (MS/MS) which confirmed labeling of C380, which is the cysteine previously  
120 reported to be *S*-palmitoylated in TEAD2<sup>13a</sup> (**Figure 1a**).

### 121 **Structure-based optimization yields MYF-03-69, an irreversible inhibitor of TEAD** 122 **palmitoylation**

123 Next, we employed a structure-based fragment growing strategy to elaborate MYF-01-37 to develop a  
124 more potent and selective inhibitor (**Figure 1a**). Given that the site of covalent modification is located  
125 at the opening of the palmitate binding pocket, we analyzed the TEAD palmitate pockets from  
126 multiple crystal structures available in the Protein Data Bank (PDB)<sup>13-14</sup>. All the structures aligned  
127 well, indicating a conserved and relatively inflexible pocket. As shown in the **Figure 1b**, docking of  
128 MYF-01-37 and TEAD2 revealed that MYF-01-37 binds in a tunnel formed by side chains of  
129 hydrophobic residues F233, F251, V252, V329, V347, M379, L383, L387, F406 and F428. We also  
130 identified a side pocket lined with hydrophilic side chains contributed by S331, S345, S377 and Q410.  
131 We hypothesized that we could improve potency and selectivity for our covalent ligands by  
132 introducing polar interactions and shape complementarity to this side pocket. Therefore, we predicted  
133 that the optimized binding pocket is Y-shaped with the targeted cysteine at one end, and hydrophobic  
134 and hydrophilic pockets at the other two ends. We envisioned that occupying the hydrophilic side  
135 pocket will also provide chance to incorporate polar moiety, leading to reduced global hydrophobicity  
136 and more druglike molecules. With this rationale, a variety of hydrophilic groups were introduced to

137 the pyrrolidine ring, leading to synthesis of a focused library of Y-shaped molecules, with  
138 representatives shown in **Figure 1c**. We employed an *in vitro* palmitoylation assay that uses an  
139 alkyne-tagged palmitoyl CoA as the lipidation substrate and clickable biotin (**Figure 1d**), to screen  
140 this series of compounds for their ability to inhibit palmitoylation (**Figure 1e, Figure S3**). We  
141 observed that the *para* substituted trifluoromethyl benzyl is superior to *meta* substituted  
142 trifluoromethyl benzyl (MYF-02-111 vs. MYF-03-42). We then replaced pyrazole by a substituted  
143 triazole to explore the hydrophilic pocket (MYF-03-135, MYF-03-162, MYF-03-138, MYF-03-146,  
144 MYF-03-69), and observed a sensitivity to various substitutions at C4 position of the triazole ring. For  
145 example, tetrahydropyran and pyridine enhanced the activities, whereas piperidine and pyridone were  
146 much less favored. In addition, we noticed that extending the hydrophobic tail of MYF-01-37 allowed  
147 more complete occupancy of the hydrophobic channel. Further modifications of the groups occupying  
148 the hydrophobic tunnel did not yield further improvement on the potency compared to trifluoromethyl  
149 benzyl (MYF-03-137, MYF-03-139), implicating restrict requirement for a hydrophobic moiety.  
150 Amongst this series of compounds, we identified MYF-03-69 (**Figure 1c**) as the most potent  
151 compound, and chose it for further characterization.

### 152 **MYF-03-69 occupies the Y-shaped pocket and forms covalent bond with the conserved cysteine** 153 **of TEAD**

154 Given that labeling efficiency of the parental fragment MYF-01-37 was moderate, we examined  
155 whether the elaborated, Y-shaped molecule labeled TEAD more efficiently. Recombinant TEAD2  
156 YBD was incubated with MYF-03-69, followed by mass spectrometry. Incubation with 10-fold molar  
157 excess of MYF-03-69 at room temperature for 1 hour led to 100% labeling (**Figure 2a**) and follow-up  
158 trypsin digestion and MS/MS analysis confirmed C380 as the modified residue (**Figure 2b**). This  
159 covalent bond formation and the exact binding mode was further validated by obtaining a high-  
160 resolution co-crystal structure of TEAD1 YBD in complex with MYF-03-69 (1.68 Å) (**Figure 2c**).  
161 Unambiguous electron density of a covalent bond was observed between TEAD1 C359 (analogous to  
162 C380 in TEAD2) and the acrylamide warhead of MYF-03-69 with the remaining part of the molecule

163 adopting a Y-shape and establishing specific interactions with the hydrophobic pocket and  
164 hydrophilic patch as predicted (**Figure 2c**). MYF-03-69 was completely buried in the lipid pocket  
165 with the *para*-trifluoromethyl benzyl group extended along a lipid trajectory, forming extensive  
166 hydrophobic interactions with side chains of A223, F239, V240, A292, I366, and F407. The 3-  
167 pyridinyl group occupied the side pocket, forming a favorable water-bridged hydrogen bond network  
168 with adjacent S310 and Y312 via pyridinyl nitrogen (**Figure 2d**). Overall, high resolution structural  
169 analysis confirms that MYF-03-69 forms covalent attachment with the TEAD cysteine that is the site  
170 of *S*-palmitoylation, and that the elaborated molecule forms specific interactions via both hydrophobic  
171 and hydrophilic regions surrounding the targeted cysteine.

172 To further characterize biochemical activity of MYF-03-69, we performed a dose titration for all  
173 TEAD paralogs (**Figure 2e**, **Figure S4**). Preincubation of all recombinant TEAD1-4 YBDs with  
174 MYF-03-69 potently inhibited palmitoylation with similar  $IC_{50}$  values at submicromolar  
175 concentrations, indicating that MYF-03-69 is a pan-TEAD inhibitor. This is consistent with the high  
176 sequence conservation of residues in the palmitate pockets of TEAD1-4. In contrast, MYF-03-69-NC  
177 (**Figure 1c**), the non-covalent counterpart of MYF-03-69 incapable of forming covalent bond,  
178 completely lost activity across all TEADs, which demonstrated the essentiality of covalent bond  
179 formation.

## 180 **MYF-03-69 inhibits TEAD palmitoylation and disrupts endogenous YAP-TEAD association in** 181 **cells**

182 We next investigated the ability of MYF-03-69 to modulate TEAD palmitoylation inside cells with  $\omega$ -  
183 alkyne palmitic acid (Alkyne-C16) as probe. Alkyne-C16 contains an alkyne group at C15 and has  
184 been shown to be metabolically incorporated into cellular proteins at native palmitoylation sites. The  
185 previously reported pulse-chase style experiment<sup>16</sup> was adopted and modified to monitor TEAD  
186 palmitoylation in HEK293T cells transfected with Myc-TEAD4. After the cells were incubated with  
187 Alkyne-C16 for 24 hours, the labeled Myc-TEAD4 was conjugated with biotin-azide through a Cu(I)-  
188 catalyzed click reaction. With western-blotting, we found that the alkyne-palmitate labeling of Myc-

189 TEAD4 decreased after cotreatment with varying concentrations of MYF-03-69 for 24 hours  
190 compared to the DMSO treatment, while TEAD protein levels were not affected (**Figure 3a**). This  
191 result suggested that MYF-03-69 competed off palmitic acid during TEAD lipidation in cells.  
192 Consistently with biochemical result, the negative control compound MYF-03-69-NC did not exhibit  
193 any effect on TEAD (**Figure 3a**).

194 Palmitoylation of TEADs was recently proposed to be required for their binding to YAP and TAZ<sup>13b</sup>.  
195 Although TEAD inhibitors with different chemotypes have been recently developed, it remains  
196 controversial whether pharmacological targeting of the TEAD palmitate pocket could disrupt  
197 YAP/TAZ association<sup>25</sup>. In order to investigate whether MYF-03-69 impairs YAP-TEAD interaction,  
198 we conducted an endogenous co-immunoprecipitation (co-IP) experiment to monitor YAP-TEAD  
199 interactions in the presence of the compound. Notably, 24-hour treatment of NCI-H226 cells with  
200 MYF-03-69 significantly decreased endogenous YAP co-immunoprecipitation with a pan-TEAD  
201 antibody, whereas this treatment had minimal effect on TEAD protein level (**Figure 3b**). In parallel,  
202 we also evaluated MYF-03-69-NC and observed no effect on YAP-TEAD association in cells. Taken  
203 together, these results suggest that MYF-03-69-mediated perturbation of TEAD palmitoylation  
204 disrupts YAP and TEAD protein interactions.

205 To demonstrate MYF-03-69 as a selective covalent TEAD binder, we interrogated the proteome-wide  
206 reactivity profile of MYF-03-69 on cysteines using a well-established streamlined cysteine activity-  
207 based protein profiling (SLC-ABPP) approach (**Figure S5a**)<sup>26</sup>. We employed the cysteine reactive  
208 desthiobiotin iodoacetamide (DBIA) probe<sup>26</sup> which was reported to map more than 8,000 cysteines  
209 and performed a competition study in NCI-H226 cells pretreated with 0.5, 2, 10 or 25  $\mu$ M of MYF-  
210 03-69 for 3 hours in triplicate. The cysteines that were conjugated >50% (competition ratio CR>2)  
211 compared to DMSO control were analyzed and assigned to the protein targets (**Figure S5b**). In the  
212 DMSO control group, although DBIA mapped 12,498 cysteines in total, the TEAD PBP cysteines  
213 were not detected. Among 12,498 mapped cysteines, only 7 cysteines were significantly labeled (i.e.  
214 exhibited >50% conjugation or CR>2) by 25  $\mu$ M of MYF-03-69, and all of these sites exhibited dose-



215 dependent engagement (**Supplementary Dataset 1**). The missing TEAD cysteines might be due to  
216 low TEAD1-4 protein abundance and/or inability of the PBP cysteines to be labeled by DBIA. DBIA  
217 probe can only be applied in cell lysate context, which might also result in the missing labeling on  
218 TEAD. To our knowledge, all the proteins with meaningful labeling efficiency (CR>2) cysteine sites  
219 are not known to be involved in the YAP/TAZ-TEAD signaling pathway. Taken together, our  
220 proteomic analysis suggests that MYF-03-69 exhibited quite low reactivity towards the cysteine  
221 proteome, although TEAD PBP cysteines were not detected by the DBIA probe.

### 222 **MYF-03-69 inhibits TEAD transcription and downregulates YAP target genes expression in** 223 **mesothelioma cells**

224 The majority of mesothelioma patients (50-75%) harbor genetic alterations in Hippo pathway  
225 regulatory components, including *NF2* loss of function mutation/deletion and *LATS1-PSEN1*  
226 fusion/*LATS2* deletion, which lead to YAP activation and Hippo pathway gene expression<sup>7</sup>. Thus, in  
227 order to monitor YAP-TEAD transcriptional activity, Hippo/YAP reporter cells were generated in  
228 NCI-H226, a *NF2*-deficient MPM cell line. After 72-hour treatment of MYF-03-69, YAP-TEAD  
229 transcriptional activity of reporter cells significantly decreased in a dose-dependent manner with an  
230 IC<sub>50</sub> value of 56 nM, while MYF-03-69-NC had minimal effect (**Figure 4a**). The transcriptional  
231 inhibition also led to significant downregulation of canonical YAP target genes including *CTGF*,  
232 *CYR61*, *IGFBP3*, *KRT34* and *NPPB* and upregulation of proapoptotic gene *BMF* in NCI-H226 cells  
233 and MSTO-211H, a *LATS1-PSEN1* fusion MPM cell line (**Figure 4b-c**), while it showed much milder  
234 effects on transcription in normal mesothelium cells MeT-5A (**Figure S6**). Protein level of *CYR61*  
235 and *AXL* gene products also decreased (**Figure 4d**, **Figure S7**). Encouraged by these results, we set  
236 out to study whole transcriptome perturbation by MYF-03-69. RNA sequencing was performed in  
237 NCI-H226 cells that were treated with 0.1 μM, 0.5 μM, and 2 μM of MYF-03-69. There were 339  
238 genes that exhibited significant differential expression at 2 μM treatment, and the majority of them  
239 changed in a dose dependent manner (**Figure 4e** and **Supplementary Dataset 2**). The genes that were  
240 differentially expressed with statistical significance (Fold change ≥ 1.5 and adjusted p value ≤ 0.05)

241 at 2  $\mu$ M treatment condition, are colored in red and partially labeled in the volcano plot (**Figure 4f**).  
242 Compared to high concentration, the number of genes with significantly altered expression level  
243 dropped off quickly at lower concentrations (**Figure S8a-b**). For example, at the concentration of 0.1  
244  $\mu$ M, only *CTGF* showed statistically significant change (**Figure S8b**). While multiple YAP target  
245 genes such as *CTGF*, *ADM*, *ANKRD1* were significantly downregulated<sup>2</sup>, *DDIT4* was observed to be  
246 upregulated<sup>27</sup>. To investigate whether the 339 differentially expressed genes were concentrated in  
247 particular biological pathways, KEGG pathway enrichment calculation<sup>28</sup> were carried out, which  
248 demonstrated Hippo signaling pathway was among the top 5 enriched processes (**Figure 4g**). Beyond  
249 the Hippo pathway, gap junction<sup>29</sup> and WNT signaling pathway<sup>30</sup> were also enriched, consistent with  
250 pleiotropic functions and cross-talk of YAP-TEAD pathway in diverse biological processes. Overall,  
251 we documented that MYF-03-69 affects transcription in a manner consistent with its activity as a  
252 disruptor of YAP-TEAD interactions.

### 253 **MYF-03-69 selectively inhibits mesothelioma cancer cells with defective Hippo signaling**

254 Next, we investigated anti-cancer activity of MYF-03-69 on Hippo signaling defective mesothelioma  
255 cells. As shown in **Figure 5a** and **Figure S9a**, 5-day cell growth assays demonstrated that MYF-03-  
256 69 potently retarded the cell growth of NCI-H226 and MSTO-211H, while it showed no  
257 antiproliferation activity against MeT-5A and NCI-H2452 cells, which are non-cancerous  
258 mesothelium cells and mesothelioma cells with intact Hippo signaling, respectively. These  
259 antiproliferative effects in NCI-H226 and MSTO-211H cells were observed under 3D spheroid  
260 suspensions culture condition as well (**Figure 5b**). Under the same conditions, the negative control  
261 compound MYF-03-69-NC was not antiproliferative (**Figure 5b, Figure S9b**). Further, cell cycle  
262 analysis demonstrated that 48-hour treatment with MYF-03-69 on NCI-H226 and MSTO-211H cells  
263 caused cell cycle arrest at the G1 phase, which is in accordance with previous findings obtained from  
264 genetic knockdown of YAP<sup>31</sup>, while negative control compound had no effect (**Figure 5c-d**).  
265 Collectively, these results show that inhibition of TEAD palmitoylation by MYF-03-69 effectively  
266 and precisely affects YAP-TEAD function.

## 267 MYF-03-69 inhibits YAP or TEAD-dependent cancer cells beyond mesothelioma

268 To further investigate whether inhibition by MYF-03-69 was selectively lethal to YAP/TEAD-  
269 dependent cancers, 903 barcoded cancer cell lines were screened using the PRISM assay<sup>23</sup>. As shown  
270 in **Figure 5e**, a small portion of cell lineages exhibited vulnerability (**Supplementary Dataset 3**).  
271 Correlation analysis reveals that the dependency scores of *TEAD1* and *YAP1* according to genomic  
272 knockout dataset (DepMap) provided the highest correlation with the sensitivity profile (**Figure S9c**,  
273 **Supplementary Dataset 4**). This is followed by *TP53BP2*, a gene that is also involved in Hippo  
274 pathway as activator of TAZ<sup>32</sup>. For example, when we used a threshold of  $AUC \leq 0.8$  for the  
275 sensitivity to MYF-03-69, 33 cell lines were selected and the majority of which are either YAP or  
276 TEADs dependent cells, as suggested by CERES scores (**Figure 5e**). These include YAP/TEAD co-  
277 dependent cells (red dots), YAP dependent cells (blue dots), and TEAD dependent cells (yellow dots).  
278 Next, to verify the antiproliferative activity, we chose three sensitive cell lines (94T778, SKHEP-1  
279 and HuCCT1) and three insensitive cell lines (93T449, MIA PaCa-2 and MM.1S) indicated by  
280 PRISM screening, as well as two additional cell lines (PC9, HEK293T) that were not included in  
281 PRISM screening panel to test in 5-day antiproliferation assay. As shown in **Figure 5f**, liposarcoma  
282 cell 94T778, hepatic adenocarcinoma cell SKHEP-1 and cholangiocarcinoma cell HuCCT1 were  
283 inhibited with nanomolar  $IC_{50}$ . In contrast, liposarcoma cell 93T449, pancreatic ductal  
284 adenocarcinoma cell MIA PaCa-2 and myeloma cell MM.1S were barely inhibited (**Figure 5g**). Since  
285 proapoptotic gene *BMF* was known to be released from repression upon TEAD inhibition<sup>10</sup>, we  
286 examined *BMF* mRNA levels after 6-hour treatment with 0.5 and 2  $\mu$ M MYF-03-69 on both sensitive  
287 and insensitive cells. As expected, *BMF* levels increased in three sensitive cells, but remained  
288 unchanged in three insensitive cells (**Figure 5h**). We also noted the upregulation of *BMF* in PC9 and  
289 HEK293T cells which are resistant to TEAD inhibition (**Figure 5g-h**). A heterogeneity of signaling  
290 pathway dependency, especially EGFR signaling and YAP1 activation in PC9 cells might account for  
291 the insensitivity to TEAD inhibition alone. Taken together, we demonstrate that TEAD inhibition  
292 could be an exploitable vulnerability across multiple malignant tumor models besides mesothelioma

293 and that upregulation of *BMF* gene is a common phenomenon in those cancer cells with sensitive  
294 antiproliferative response to TEAD inhibitor.

295 **MYF-03-176 exhibits significant antitumor efficacy in NCI-H226 xenograft mouse model**  
296 **through oral administration**

297 In order to demonstrate therapeutic potential of covalent TEAD palmitoylation disruptor, extensive  
298 medicinal chemistry efforts were undertaken on this Y-shaped scaffold, leading to a more potent and  
299 more importantly, orally bioavailable MYF-03-69 analog MYF-03-176 (**Figure 6a**). Before we  
300 administrated the mice with MYF-03-176, we conducted a head-to-head comparison on the activity  
301 with MYF-03-69 as well as other reported TEAD inhibitors including K-975, compound 2 and VT103.  
302 We used a stably transfected TEAD luciferase reporter system in NCI-H226 cells to profile  
303 transcriptional effect of TEAD inhibitors. Consistently with the results of mCherry reporter system,  
304 MYF-03-69 inhibited the transcription of reporter gene at IC<sub>50</sub> of 45 nM (**Figure S10a**) and  
305 interestingly MYF-03-176 was 3-fold more potent with IC<sub>50</sub> of 11 nM (**Figure 6b**). Further, similar to  
306 MYF-03-69, MYF-03-176 led to a significant downregulation of YAP target genes *CTGF*, *CYR61*,  
307 *ANKRD1* and an upregulation of *BMF* (**Figure S10b**). As comparison, MYF-03-176 exhibited  
308 comparable and even better activity than K-975 and compound 2, while was less potent than VT103  
309 as shown in **Figure 6b~c**. The antiproliferative effect of MYF-03-176 in NCI-H226 cells was similar  
310 to VT-103 and K-975 but even stronger than MYF-03-69 and compound 2. With the support of all  
311 these data from MYF-03-176 and decent pharmacokinetics properties including low clearance and  
312 high oral bioavailability (**Figure S10c-d**), we then administrated MYF-03-176 to NCI-H226 cell line  
313 derived xenograft (CDX) mouse model. The tumor-bearing mice were randomized and orally  
314 administrated MYF-03-176 twice daily for 28 days. Significant antitumor activity with tumor  
315 regressions was observed at both 30 mg/kg (average tumor regression of 54%) and 75 mg/kg (average  
316 tumor regression of 68%). The anti-tumor activity at the two doses was comparable ( $P = 0.23$ , 2-way  
317 ANOVA). The 30 mg/kg dose was well tolerated with an average body weight gain comparable to  
318 vehicle control (data not shown), while at the 75 mg/kg dose, an average weight loss of 5% was

319 observed. However, at this 75 mg/kg dose, 3 of 8 animals demonstrated 12-14% body weight loss.  
320 The weight loss recovered once drug administration was stopped (**Figure 6f**). Taking all these  
321 together, MYF-03-176 potently inhibited Hippo signaling defective MPM cells and exhibited strong  
322 antitumor effect in the human mesothelioma NCI-H226 CDX model *in vivo*, representing a promising  
323 leading compound for drug discovery.

## 324 **Discussion**

325 As widely recognized oncogenic proteins, YAP/TAZ have emerged as potentially attractive targets for  
326 anti-cancer drug development. However, the unstructured nature of YAP/TAZ proteins renders them  
327 difficult to target by conventional occupancy-based small molecules. Therefore, the majority of  
328 compounds that are known to inhibit YAP activity are targeted at upstream stimulators of YAP/TAZ.  
329 In this context, TEADs, key components of Hippo signaling pathway that depend on YAP/TAZ  
330 binding for activation of transcriptional activity, have attracted attention. Here, the presence of a well-  
331 defined palmitate binding pocket (PBP) on TEADs suggested opportunity for small molecule inhibitor  
332 development. However, recent studies have not fully resolved the question of whether occupying  
333 TEAD PBP disrupts or stabilizes YAP-TEAD interaction. Chan et al. suggested that palmitoylation of  
334 TEAD stabilizes YAP-TEAD interaction<sup>13b</sup>. Holden et al. reported the reversible PBP binder  
335 compound 2 had minimal to no disruptive effect on YAP-TEAD interaction biochemically but  
336 transformed TEAD into a dominant-negative transcriptional repressor<sup>16</sup>. VT series compounds  
337 reported by Tang et al. dissociated endogenous YAP-TEAD according to co-IP experiment<sup>17</sup>, which is  
338 consistent with our result of MYF-03-69. Other data from MGH-CP1<sup>15</sup> and covalent binder K-975<sup>20</sup>  
339 pointed to the same conclusion while the experiments were performed with exogenous YAP or TEAD.  
340 K-975 and TED-347 were reported to disrupt protein-protein interaction between TEAD and YAP  
341 peptide in biochemical assay. However, their co-crystal structures indicated no conformation change  
342 compared with palmitoylated TEAD. Similarly, superimposition of co-crystal structures of TEADs  
343 with MGH-CP1, compound 2, VT105, MYF-03-69 and their corresponding palmitoylated TEADs did  
344 not reveal any obvious conformation change or side chain move that might affect YAP binding.

345 Taken all these together, the transcriptional inhibitory effect of these TEAD PBP binders might result  
346 from disruption of certain dynamic process of TEAD lifecycle. Recently, several reports elaborated  
347 that YAP/TAZ and TEAD undergo lipid-lipid phase separation (LLPS) during transcription process<sup>33</sup>.  
348 One hypothesis is the alkyl chain of palmitoyl might escape from TEAD PBP and expose to outside  
349 when forming such functional transcription compartment. The hydrophobic nature of the lipid chain  
350 may play a role in organizing the disordered and hydrophobic region of YAP. Thus, replacement of  
351 palmitate by these PBP binders leads to incapability of TEAD to organize into transcription  
352 machinery, though the direct binding to YAP peptide may not being affected *in vitro*. The underlying  
353 mechanism is remained to be uncovered in the future.

354 MYF-03-69 is a covalent compound that we designed to target the conserved cysteine on TEAD, the  
355 site of palmitoylation. The starting point for MYF-03-69 was a fragment hit that we identified through  
356 screening of a biased covalent fragment library and further optimized using structure-based strategy.  
357 Unlike screening reversible fragments which often require significant follow-up efforts to determine  
358 binding site, the MS-guided covalent tethering method gives unambiguous information of labeling site  
359 in a cost and time efficient way. Unlike previously reported compounds that engage only the  
360 hydrophobic PBP, our optimized inhibitor was developed to exploit interactions with not only the  
361 PBP but a hydrophilic binding pocket that we have identified during this study. Thus, our optimized  
362 inhibitor MYF-03-69 is a Y-shaped molecule which efficiently occupies two pockets, as well as  
363 covalently binds the conserved cysteine, which contributed significantly to both potency and  
364 specificity. Therefore, we speculated that MYF-03-69 may be employed as a useful tool to interrogate  
365 the process of how PBP binder affect TEAD homeostasis. We also propose that further optimization  
366 of the basic Y-shaped molecule reported here may yield paralog-selective TEAD inhibitors.

367 Aberrant regulation of Hippo-YAP/TAZ-TEAD signaling axis has been recognized as driver for  
368 genesis and development of multiple cancers, especially in mesothelioma. Besides the Hippo pathway,  
369 diverse signaling pathways such as Wnt, TGF- $\beta$ , EGFR and Hedgehog pathways can also potentiate  
370 the activation of YAP/TAZ. Given such essentiality, it is important to ascertain what portion of these  
371 YAP/TAZ activated cancers are vulnerable to TEAD inhibition. The pan-TEAD selective nature of

372 MYF-03-69 allowed us to examine this question at the TEAD family level using a panel of more than  
373 900 cancer cell lines. Our results demonstrated that MYF-03-69 exhibited selective antiproliferative  
374 effect on YAP or TEAD dependent cancer cells from different lineages including mesothelioma, liver  
375 cancer, liposarcoma, and lung cancer. Strong antitumor efficacy in human mesothelioma NCI-H226  
376 CDX model has been achieved with an orally bioavailable compound MYF-03-176 in the same  
377 scaffold, which is ready to be tested in various cancer models. Moreover, we noted that increased  
378 expression of a proapoptotic *BMF* gene correlates with response to TEAD inhibition in some cancer  
379 cell lines.

380 Collectively, this study provides evidence that MYF-03-69 represents a potent, covalent, cysteine-  
381 targeted pan-TEAD inhibitor that disrupts YAP-TEAD association and affects transcription in  
382 covalent binding-dependent manner. Given its “mild” covalent warhead and low reactivity across  
383 proteome, we nominate MYF-03-69 as a viable lead for drug discovery for not only mesothelioma,  
384 but other YAP or TEAD dependent cancers such as liver cancer, liposarcoma, and lung cancer.

385

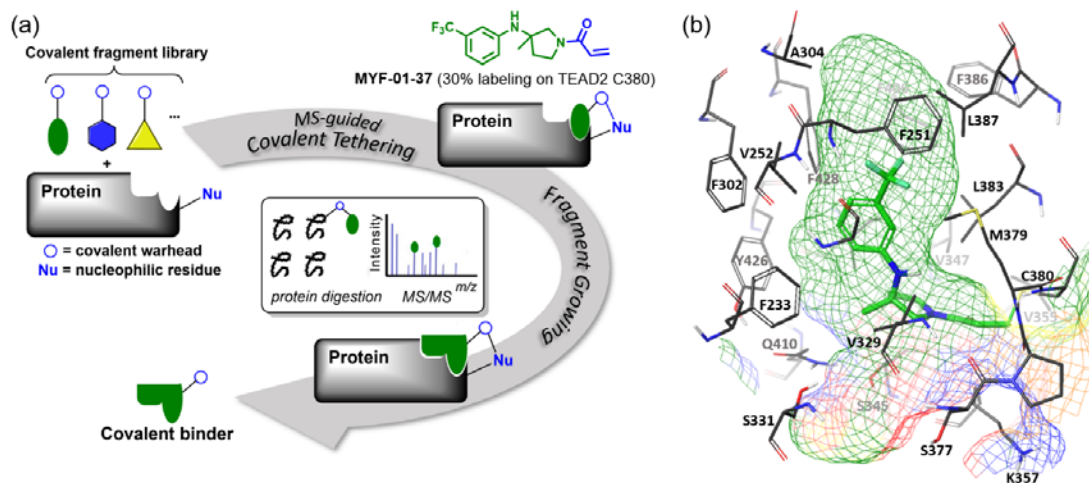

386



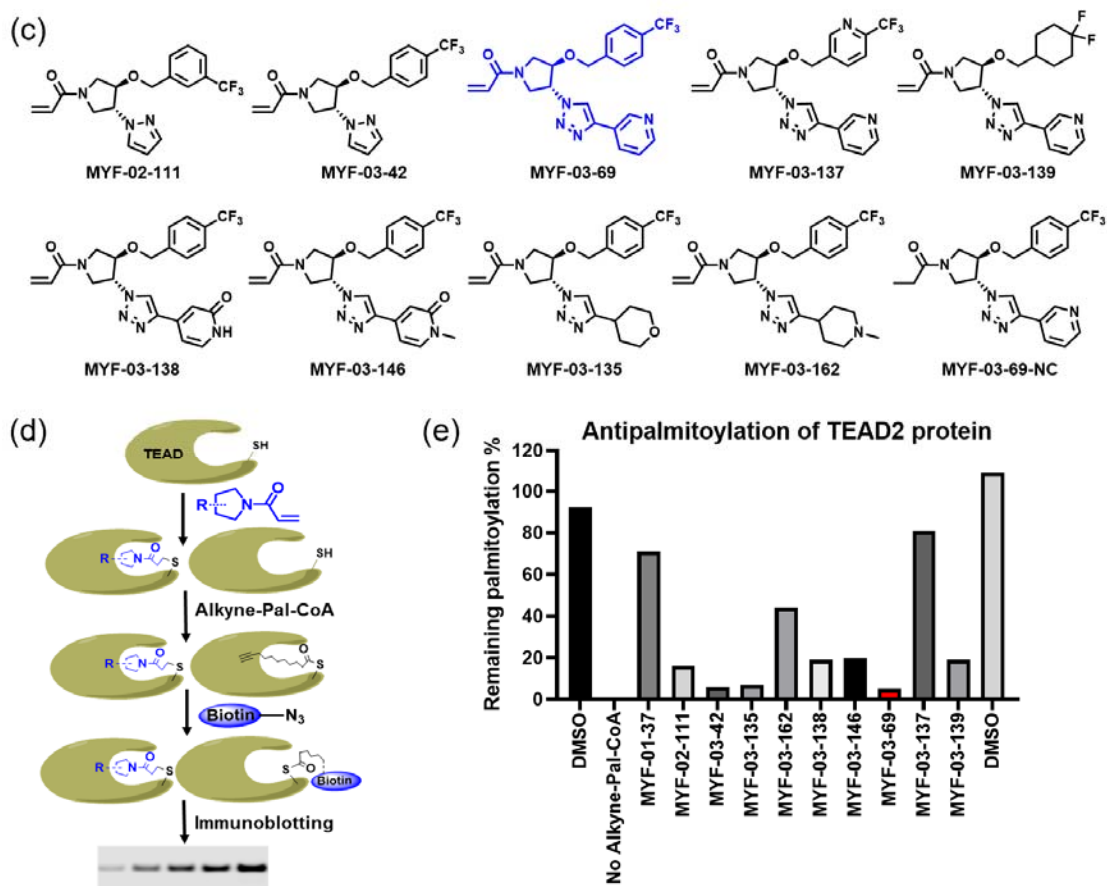

387

388 **Figure 1 | Covalent fragments screening and structure-guided design to identify Y-shaped**  
389 **compound MYF-03-69.** (a) Illustration of covalent fragment library screening and optimization for  
390 TEAD inhibitor. (b) Surface of TEAD2 palmitate pocket depicted in mesh with MYF-01-37 (in green)  
391 modeled in. Residues forming the pocket were labeled. The color of mesh indicates hydrophobicity of  
392 the pocket surface. (c) Chemical structures of representative Y-shaped compounds. (d) The schematic  
393 diagram of *in vitro* palmitoylation assay. (e) Anti-palmitoylation activity of MYF-01-37 and Y-shaped  
394 compounds after TEAD2 protein was pre-incubated with 2  $\mu$ M compound at 37°C for 2 hours.

395



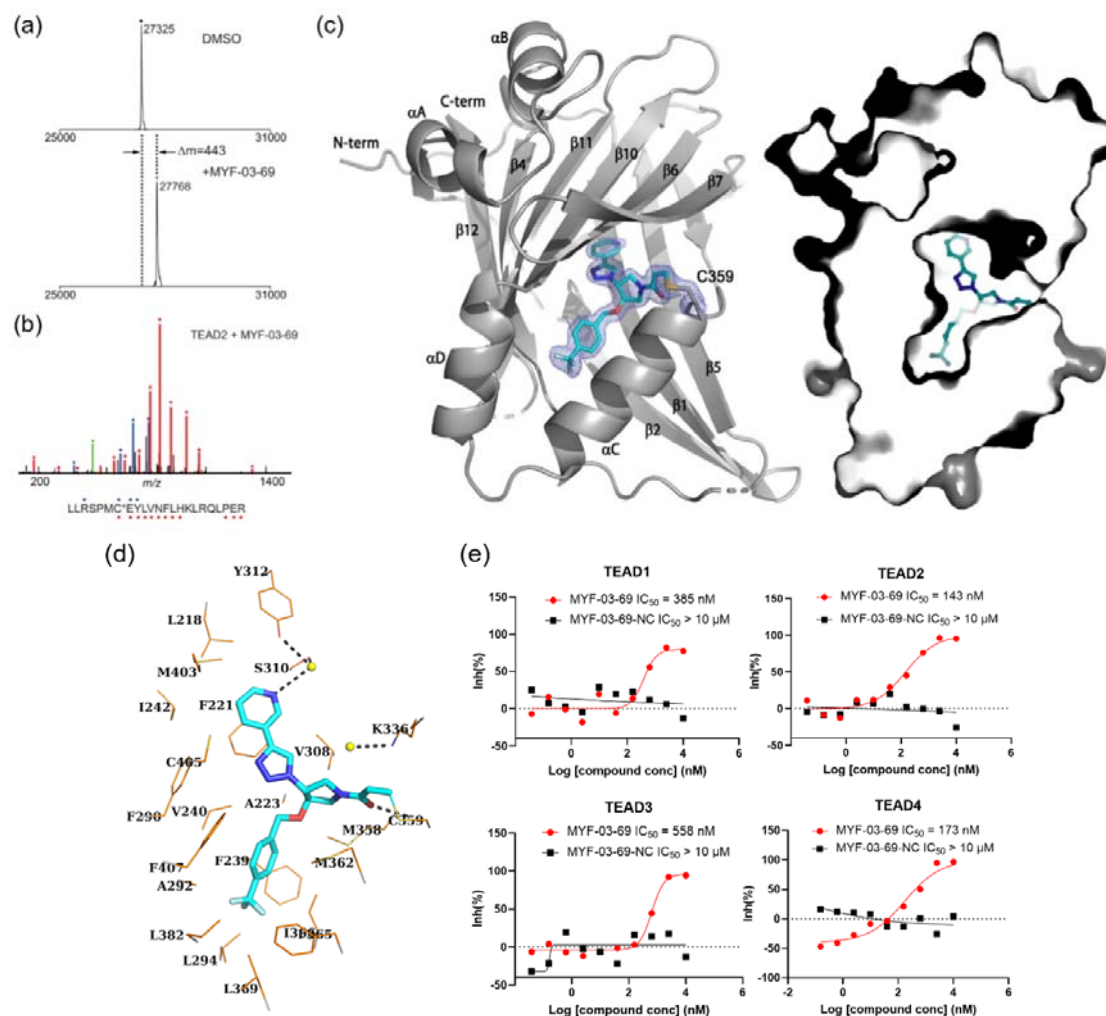

396

397

398

399

**Figure 2 | MYF-03-69 binds in TEAD palmitate pocket covalently through the conserved**

400

**cysteine.** (a) The mass labeling of intact TEAD2 protein by MYF-03-69. (b) Trypsin digestion and

401

tandem mass spectrometry (MS/MS) localize labeling site of cysteine 380. (c) Co-crystal structure of

402

MYF-03-69 with TEAD1 indicates covalent bond formation with Cys359. The compound adopts Y-

403

shape and binds in both lipid tunnel and hydrophilic side pocket. (d) Interactions between MYF-03-69

404

and TEAD1 palmitate pocket. (e) A dose titration of MYF-03-69 and MYF-03-69-NC in anti-

405

palmitoylation assay on TEAD1-4. Recombinant YBD protein of TEADs were preincubated with

406

compounds at 37°C for 2 hours. Data are representative of n = 3 independent experiments.

407

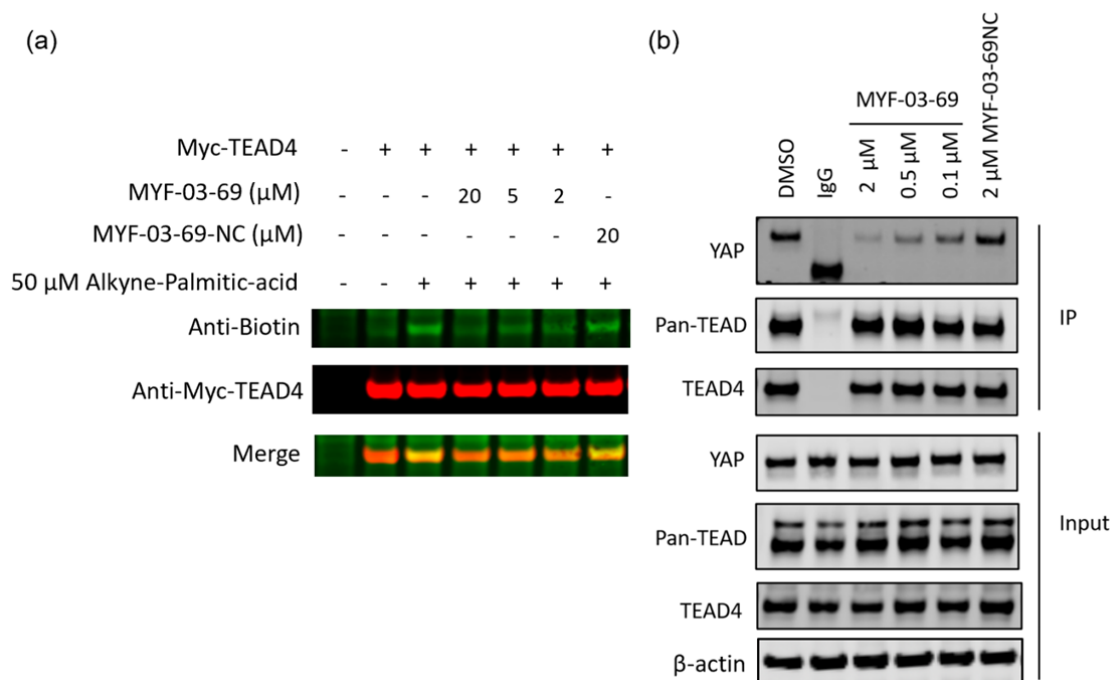

408

409 **Figure 3 | MYF-03-69 inhibits palmitoylation of TEAD protein and disrupts its association with**

410 **YAP in cells. (a)** Palmitoylation of Myc-TEAD4 in HEK293T cells after treatment with MYF-03-69

411 and MYF-03-69-NC indicated by an alkyne-palmitic-acid probe and click chemistry. Cells were

412 treated for 24 hours. **(b)** Co-immunoprecipitation (Co-IP) of endogenous YAP and TEAD in NCI-

413 H226 cells after treatment with MYF-03-69 and MYF-03-69-NC at indicated doses. Cells were

414 treated for 24 hours.

415

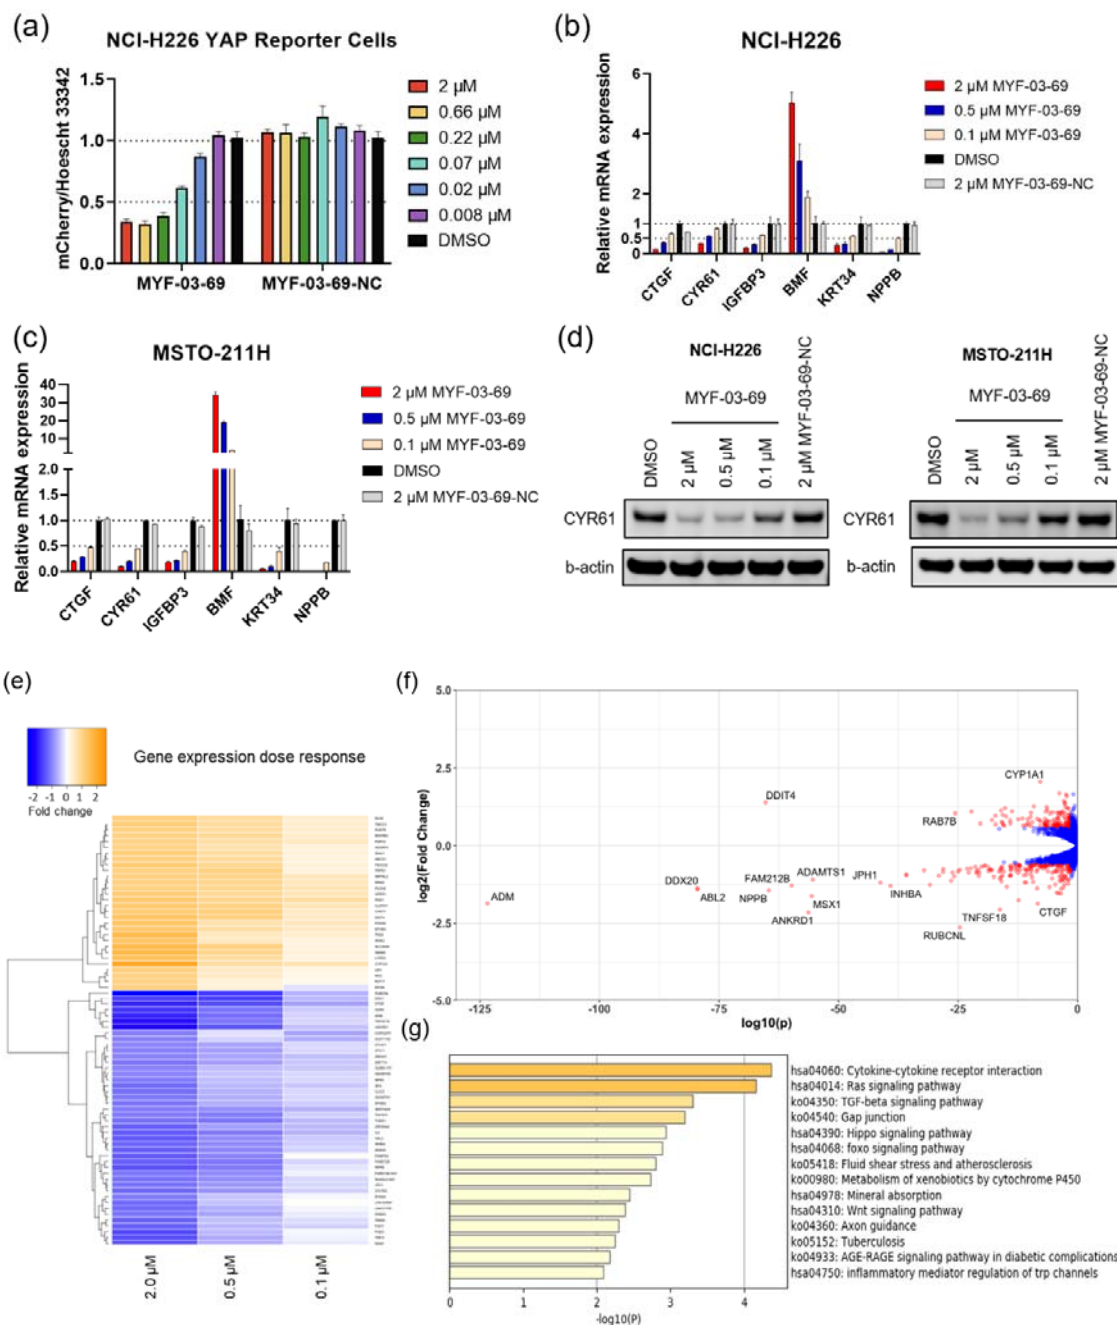

416

417

418 **Figure 4 | MYF-03-69 inhibits YAP-TEAD transcription.** (a) MYF-03-69, but not MYF-03-69-  
 419 NC, inhibits YAP-TEAD transcriptional activity in NCI-H226 mCherry reporter cells. Cells were  
 420 treated for 72 hours. (b-c) MYF-03-69, but not MYF-03-69-NC, downregulates YAP target genes and  
 421 upregulates a pro-apoptotic gene *BMF*. Cells were treated for 24 hours. Data were presented as mean  
 422  $\pm$  SD of  $n = 3$  biological independent samples. (d) MYF-03-69, but not MYF-03-69-NC,  
 423 downregulates CYR61 protein level in NCI-H226 and MSTO-211H cells. (e) Heatmap for gene

424 expression change with MYF-03-69 treatment at indicated concentrations. (f) Differential gene  
425 expression from RNA sequencing of NCI-H226 cells treated with 2  $\mu$ M MYF-03-69. The  
426 differentially expressed genes with  $FC \geq 1.5$  and  $p \leq 0.05$  were colored in red and labeled. Not all  
427 differentially expressed genes were labeled. (g) Pathway enrichment analysis of differentially  
428 expressed genes from 2  $\mu$ M compound treatment samples.

429

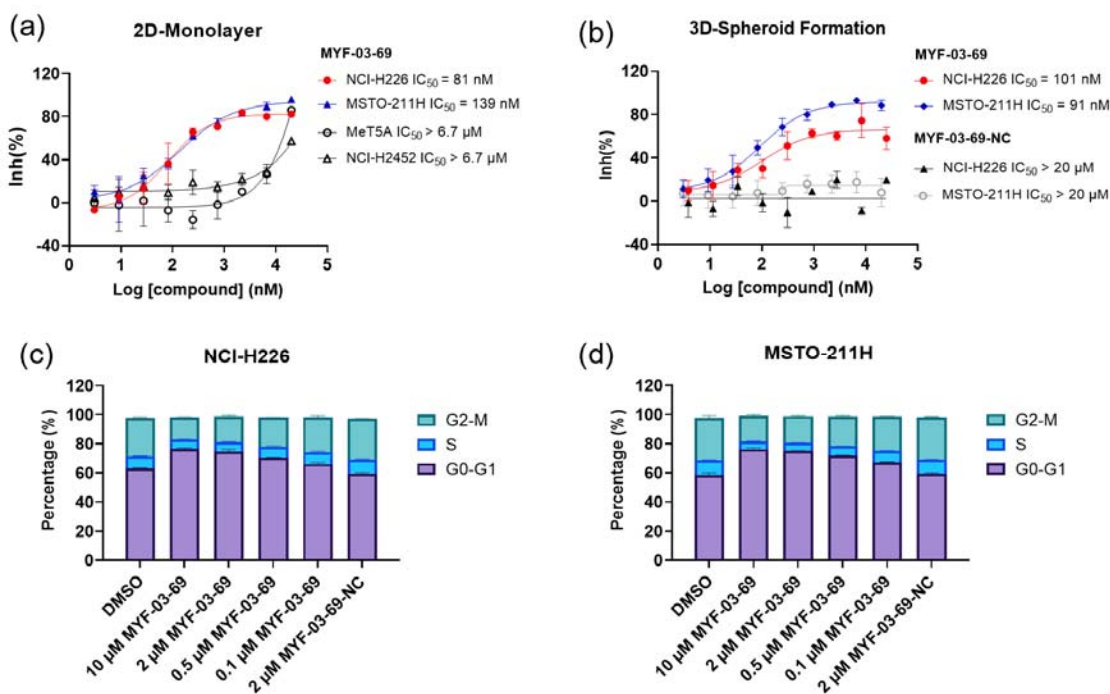

430

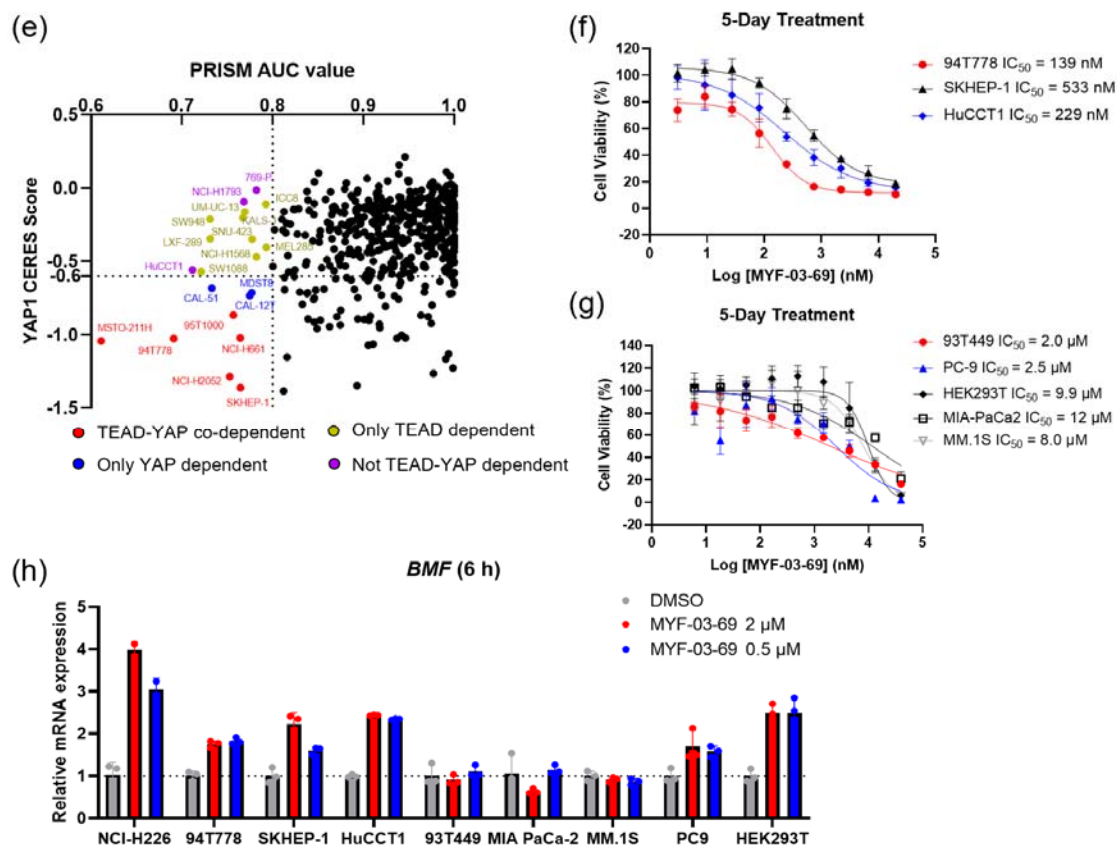

431

432 **Figure 5 | MYF-03-69 selectively inhibits proliferation of cancer cells with YAP or TEAD**

433 **dependency regardless of lineage. (a)** Antiproliferation  $IC_{50}$  curve of MYF-03-69 on three

434 mesothelioma cell lines (NCI-H226, MSTO-211H and NCI-H2452) and a normal noncancerous

435 mesothelium cell line (Met-5A). **(b)** Antiproliferation  $IC_{50}$  curve of MYF-03-69 and MYF-03-69-NC

436 in 3D cell culture. **(c-d)** Cell cycle arrest induced by MYF-03-69, but not MYF-03-69-NC. Cells were

437 treated for 48 hours at indicated doses. **(e)** PRISM profiling across a broad panel of cell lineages. 903

438 cancer cells were treated with MYF-03-69 for 5 days. The viability values were measured at 8-point

439 dose manner (3-fold dilution from 10  $\mu$ M) and fitted a dose-response curve for each cell line. Area

440 under the curve (AUC) was calculated as a measurement of compound effect on cell viability. CERES

441 score of YAP1 or TEADs from CRISPR (Avena) Public 21Q1 dataset (DepMap) were used to

442 estimate gene-dependency. Cell lines without CERES Score of YAP1 were excluded from the figure.

443 The CERES Score of most dependent TEAD isoform was used to represent TEAD dependency. Cell

444 lines with a dependency score less than -0.6 were defined as the dependent cell lines. **(f)**

445 Antiproliferation curves of cell lines that are sensitive to MYF-03-69 treatment besides mesothelioma.

446 (g) Antiproliferation curves of cell lines that are insensitive to MYF-03-69 treatment. (h) *BMF*  
447 expression level after treatment with 0.5 or 2  $\mu$ M MYF-03-69 over 6 hours in different cells.  
448

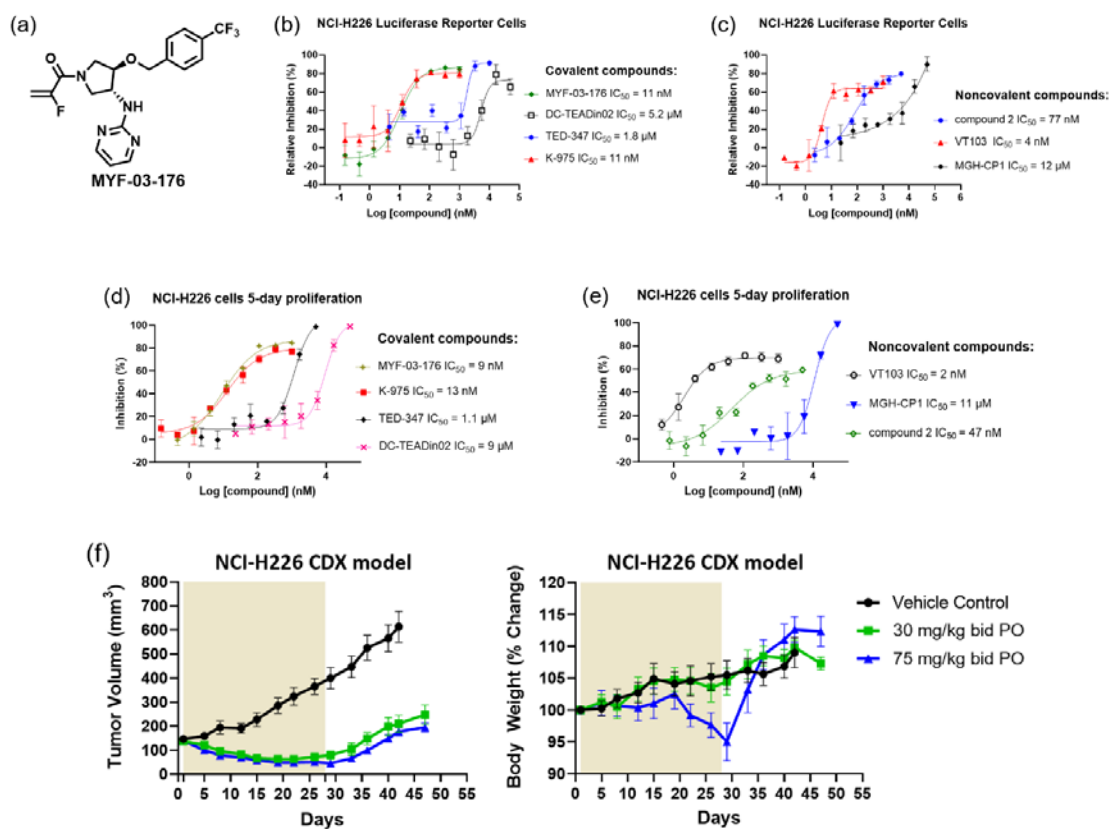

449

450

451 **Figure 6 | MYF-03-176 is a potent and orally bioavailable YAP-TEAD transcription inhibitor**  
452 **and suppresses tumor growth in mesothelioma xenograft mouse model.** (a) Chemical structure of  
453 MYF-03-176. (b-c) Inhibitory effect of MYF-03-176 and other TEAD PBP binders on YAP-TEAD  
454 transcription in NCI-H226 luciferase reporter cells. Cells were treated for 72 hours. Data were  
455 presented as mean  $\pm$  SD of  $n = 3$  biological independent samples. (d-e) Antiproliferation effect of  
456 MYF-03-176 and other TEAD PBP binders in NCI-H226 cells. Cells were treated for 5 days. Data  
457 were presented as mean  $\pm$  SD of  $n = 3$  biological independent samples. (f) *In vivo* efficacy of MYF-  
458 03-176 in NCI-H226 CDX mouse model ( $n = 8-9$  per group).

459



460 **Acknowledgments:** The authors would like to thank the following for valuable help with this study:  
461 Dr. Milka. Kostic for her advice and editing for this manuscript; Jim Sun at the NMR facility of the  
462 Dana-Farber Cancer Institute for his assistance on <sup>1</sup>H NMR data collection; Zachary Herbert from the  
463 Molecular Biology Core Facility at the Dana-Farber Cancer Institute for the sequencing services; Kara  
464 Soroko and Jessica Sarro from Dana-Farber Cancer Institute for the animal study services. J.D.M.  
465 acknowledges this work was supported by the Hale Family Center for Pancreatic Cancer Research.

466 **Author contributions:** N.S.G. and T.Z. conceived the project. M.F. performed the compound  
467 synthesis and structure determination with help from Y.L., W.J. and Z.H.. W.L. executed biological  
468 experimental research with help from Y.G., N.K., J.J. and J.T.. J.C. executed computational modeling  
469 and RNA sequencing analysis. S.B.F. and J.A.M. executed and analyzed protein mass spectrum. H.S.,  
470 E.A.G., J.L., K.S. and S.D.P. executed protein expression, purification, crystallization and structural  
471 determination. P.C.G. managed the animal study and analyzed the results. M.K. and J.D.M. performed  
472 the SLC-ABPP profiling and analysis. A.S.B., M.G.R., M.M.R. and J.A.R. executed PRISM  
473 screening and analysis. M.F., W.L., T.Z., J.C. and N.S.G. co-wrote the paper. All authors edited the  
474 manuscript.

475 **Declaration of interests:** N.S.G. is a founder, science advisory board (SAB) member and equity  
476 holder in Syros, Jengu, C4, B2S, Allorion, Inception, GSK, Larkspur (board member) and Soltego  
477 (board member). The Gray lab receives or has received research funding from Novartis, Takeda,  
478 Astellas, Taiho, Janssen, Kinogen, Voronoi, Interline, Springworks and Sanofi. T.Z. is a consultant  
479 and equity holder of EoCys. J.C. is a consultant to Soltego, Jengu, Allorion, EoCys, and equity holder  
480 for Soltego, Allorion, EoCys, and M3 bioinformatics & technology Inc. The Gray lab has sponsored  
481 research agreement for TEAD inhibitor project with Epiphanes. M.F., W.L., Y.L., J.C., Y.G., N.K.,  
482 T.Z. and N.S.G. are inventors on TEAD inhibitor patents.

483

484 **Reference**

- 485 1. (a) Ota, M.; Sasaki, H., Mammalian Tead proteins regulate cell proliferation and contact  
486 inhibition as transcriptional mediators of Hippo signaling. *Development* **2008**, *135* (24), 4059-4069;
- 487 (b) Pan, D., The Hippo Signaling Pathway in Development and Cancer. *Developmental Cell* **2010**, *19*  
488 (4), 491-505; (c) Harvey, K. F.; Zhang, X.; Thomas, D. M., The Hippo pathway and human cancer.  
489 *Nature Reviews Cancer* **2013**, *13* (4), 246-257; (d) Yu, F.-X.; Zhao, B.; Guan, K.-L., Hippo Pathway  
490 in Organ Size Control, Tissue Homeostasis, and Cancer. *Cell* **2015**, *163* (4), 811-828.
- 491 2. Zhao, B.; Ye, X.; Yu, J.; Li, L.; Li, W.; Li, S.; Yu, J.; Lin, J. D.; Wang, C.-Y.; Chinnaiyan, A.  
492 M.; Lai, Z.-C.; Guan, K.-L., TEAD mediates YAP-dependent gene induction and growth control.  
493 *Genes & Development* **2008**, *22* (14), 1962-1971.
- 494 3. (a) Zanconato, F.; Cordenonsi, M.; Piccolo, S., YAP/TAZ at the Roots of Cancer. *Cancer*  
495 *Cell* **2016**, *29* (6), 783-803; (b) Zanconato, F.; Cordenonsi, M.; Piccolo, S., YAP and TAZ: a  
496 signalling hub of the tumour microenvironment. *Nature Reviews Cancer* **2019**, *19* (8), 454-464; (c)  
497 Moroishi, T.; Hansen, C. G.; Guan, K.-L., The emerging roles of YAP and TAZ in cancer. *Nature*  
498 *Reviews Cancer* **2015**, *15* (2), 73-79.
- 499 4. (a) Stein, C.; Bardet, A. F.; Roma, G.; Bergling, S.; Clay, I.; Ruchti, A.; Agarinis, C.;  
500 Schmelzle, T.; Bouwmeester, T.; Schübeler, D.; Bauer, A., YAP1 Exerts Its Transcriptional Control  
501 via TEAD-Mediated Activation of Enhancers. *PLOS Genetics* **2015**, *11* (8), e1005465; (b) Zanconato,  
502 F.; Forcato, M.; Battilana, G.; Azzolin, L.; Quaranta, E.; Bodega, B.; Rosato, A.; Bicciato, S.;  
503 Cordenonsi, M.; Piccolo, S., Genome-wide association between YAP/TAZ/TEAD and AP-1 at  
504 enhancers drives oncogenic growth. *Nature Cell Biology* **2015**, *17* (9), 1218-1227; (c) Galli,  
505 Giorgio G.; Carrara, M.; Yuan, W.-C.; Valdes-Quezada, C.; Gurung, B.; Pepe-Mooney, B.; Zhang, T.;  
506 Geeven, G.; Gray, Nathanael S.; de Laat, W.; Calogero, Raffaele A.; Camargo, Fernando D., YAP  
507 Drives Growth by Controlling Transcriptional Pause Release from Dynamic Enhancers. *Molecular*  
508 *Cell* **2015**, *60* (2), 328-337.
- 509 5. (a) Zhou, D.; Conrad, C.; Xia, F.; Park, J.-S.; Payer, B.; Yin, Y.; Lauwers, G. Y.; Thasler, W.;  
510 Lee, J. T.; Avruch, J.; Bardeesy, N., Mst1 and Mst2 Maintain Hepatocyte Quiescence and Suppress  
511 Hepatocellular Carcinoma Development through Inactivation of the Yap1 Oncogene. *Cancer Cell*  
512 **2009**, *16* (5), 425-438; (b) Camargo, F. D.; Gokhale, S.; Johnnidis, J. B.; Fu, D.; Bell, G. W.; Jaenisch,



- 513 R.; Brummelkamp, T. R., YAP1 Increases Organ Size and Expands Undifferentiated Progenitor Cells.  
514 *Current Biology* **2007**, *17* (23), 2054-2060; (c) Liu-Chittenden, Y.; Huang, B.; Shim, J. S.; Chen, Q.;  
515 Lee, S.-J.; Anders, R. A.; Liu, J. O.; Pan, D., Genetic and pharmacological disruption of the TEAD–  
516 YAP complex suppresses the oncogenic activity of YAP. *Genes & Development* **2012**, *26* (12), 1300–  
517 1305.
- 518 6. (a) Petrilli, A. M.; Fernández-Valle, C., Role of Merlin/NF2 inactivation in tumor biology.  
519 *Oncogene* **2016**, *35* (5), 537-548; (b) Zhang, N.; Bai, H.; David, K. K.; Dong, J.; Zheng, Y.; Cai, J.;  
520 Giovannini, M.; Liu, P.; Anders, R. A.; Pan, D., The Merlin/NF2 Tumor Suppressor Functions  
521 through the YAP Oncoprotein to Regulate Tissue Homeostasis in Mammals. *Developmental Cell*  
522 **2010**, *19* (1), 27-38; (c) Plouffe, S. W.; Meng, Z.; Lin, K. C.; Lin, B.; Hong, A. W.; Chun, J. V.; Guan,  
523 K.-L., Characterization of Hippo Pathway Components by Gene Inactivation. *Molecular Cell* **2016**,  
524 *64* (5), 993-1008.
- 525 7. (a) Bueno, R.; Stawiski, E. W.; Goldstein, L. D.; Durinck, S.; De Rienzo, A.; Modrusan, Z.;  
526 Gnad, F.; Nguyen, T. T.; Jaiswal, B. S.; Chirieac, L. R.; Sciaranghella, D.; Dao, N.; Gustafson, C. E.;  
527 Munir, K. J.; Hackney, J. A.; Chaudhuri, A.; Gupta, R.; Guillory, J.; Toy, K.; Ha, C.; Chen, Y.-J.;  
528 Stinson, J.; Chaudhuri, S.; Zhang, N.; Wu, T. D.; Sugarbaker, D. J.; de Sauvage, F. J.; Richards, W.  
529 G.; Seshagiri, S., Comprehensive genomic analysis of malignant pleural mesothelioma identifies  
530 recurrent mutations, gene fusions and splicing alterations. *Nature Genetics* **2016**, *48* (4), 407-416; (b)  
531 Miyanaga, A.; Masuda, M.; Tsuta, K.; Kawasaki, K.; Nakamura, Y.; Sakuma, T.; Asamura, H.;  
532 Gemma, A.; Yamada, T., Hippo Pathway Gene Mutations in Malignant Mesothelioma: Revealed by  
533 RNA and Targeted Exon Sequencing. *Journal of Thoracic Oncology* **2015**, *10* (5), 844-851.
- 534 8. Nguyen, C. D. K.; Yi, C., YAP/TAZ Signaling and Resistance to Cancer Therapy. *Trends in*  
535 *Cancer* **2019**, *5* (5), 283-296.
- 536 9. Tsuji, T.; Ozasa, H.; Aoki, W.; Aburaya, S.; Yamamoto Funazo, T.; Furugaki, K.; Yoshimura,  
537 Y.; Yamazoe, M.; Ajimizu, H.; Yasuda, Y.; Nomizo, T.; Yoshida, H.; Sakamori, Y.; Wake, H.; Ueda,  
538 M.; Kim, Y. H.; Hirai, T., YAP1 mediates survival of ALK-rearranged lung cancer cells treated with  
539 alectinib via pro-apoptotic protein regulation. *Nature Communications* **2020**, *11* (1), 74.

- 540 10. Kurppa, K. J.; Liu, Y.; To, C.; Zhang, T.; Fan, M.; Vajdi, A.; Knelson, E. H.; Xie, Y.; Lim, K.;  
541 Cejas, P.; Portell, A.; Lizotte, P. H.; Ficarro, S. B.; Li, S.; Chen, T.; Haikala, H. M.; Wang, H.;  
542 Bahcall, M.; Gao, Y.; Shalhout, S.; Boettcher, S.; Shin, B. H.; Thai, T.; Wilkens, M. K.; Tillgren, M.  
543 L.; Mushajiang, M.; Xu, M.; Choi, J.; Bertram, A. A.; Ebert, B. L.; Beroukhim, R.; Bandopadhyay,  
544 P.; Awad, M. M.; Gokhale, P. C.; Kirschmeier, P. T.; Marto, J. A.; Camargo, F. D.; Haq, R.; Paweletz,  
545 C. P.; Wong, K.-K.; Barbie, D. A.; Long, H. W.; Gray, N. S.; Jänne, P. A., Treatment-Induced Tumor  
546 Dormancy through YAP-Mediated Transcriptional Reprogramming of the Apoptotic Pathway.  
547 *Cancer Cell* **2020**, *37* (1), 104-122.e12.
- 548 11. (a) Santucci, M.; Vignudelli, T.; Ferrari, S.; Mor, M.; Scalvini, L.; Bolognesi, M. L.; Uliassi,  
549 E.; Costi, M. P., The Hippo Pathway and YAP/TAZ–TEAD Protein–Protein Interaction as Targets for  
550 Regenerative Medicine and Cancer Treatment. *Journal of Medicinal Chemistry* **2015**, *58* (12), 4857-  
551 4873; (b) Gibault, F.; Sturbaut, M.; Bailly, F.; Melnyk, P.; Cotellet, P., Targeting Transcriptional  
552 Enhanced Associate Domains (TEADs). *Journal of Medicinal Chemistry* **2018**, *61* (12), 5057-5072; (c)  
553 Dey, A.; Varelas, X.; Guan, K.-L., Targeting the Hippo pathway in cancer, fibrosis, wound healing  
554 and regenerative medicine. *Nature Reviews Drug Discovery* **2020**, *19* (7), 480-494.
- 555 12. Zhang, Z.; Lin, Z.; Zhou, Z.; Shen, H. C.; Yan, S. F.; Mayweg, A. V.; Xu, Z.; Qin, N.; Wong,  
556 J. C.; Zhang, Z.; Rong, Y.; Fry, D. C.; Hu, T., Structure-Based Design and Synthesis of Potent Cyclic  
557 Peptides Inhibiting the YAP–TEAD Protein–Protein Interaction. *ACS Medicinal Chemistry Letters*  
558 **2014**, *5* (9), 993-998.
- 559 13. (a) Noland, Cameron L.; Gierke, S.; Schnier, Paul D.; Murray, J.; Sandoval, Wendy N.;  
560 Sagolla, M.; Dey, A.; Hannoush, Rami N.; Fairbrother, Wayne J.; Cunningham, Christian N.,  
561 Palmitoylation of TEAD Transcription Factors Is Required for Their Stability and Function in Hippo  
562 Pathway Signaling. *Structure* **2016**, *24* (1), 179-186; (b) Chan, P.; Han, X.; Zheng, B.; DeRan, M.; Yu,  
563 J.; Jarugumilli, G. K.; Deng, H.; Pan, D.; Luo, X.; Wu, X., Autopalmitoylation of TEAD proteins  
564 regulates transcriptional output of the Hippo pathway. *Nature Chemical Biology* **2016**, *12* (4), 282-  
565 289.
- 566 14. Pobbati, Ajaybabu V.; Han, X.; Hung, Alvin W.; Weiguang, S.; Huda, N.; Chen, G.-Y.; Kang,  
567 C.; Chia, Cheng San B.; Luo, X.; Hong, W.; Poulsen, A., Targeting the Central Pocket in Human

- 568 Transcription Factor TEAD as a Potential Cancer Therapeutic Strategy. *Structure* **2015**, *23* (11),  
569 2076-2086.
- 570 15. Li, Q.; Sun, Y.; Jarugumilli, G. K.; Liu, S.; Dang, K.; Cotton, J. L.; Xiol, J.; Chan, P. Y.;  
571 DeRan, M.; Ma, L.; Li, R.; Zhu, L. J.; Li, J. H.; Leiter, A. B.; Ip, Y. T.; Camargo, F. D.; Luo, X.;  
572 Johnson, R. L.; Wu, X.; Mao, J., Lats1/2 Sustain Intestinal Stem Cells and Wnt Activation through  
573 TEAD-Dependent and Independent Transcription. *Cell Stem Cell* **2020**, *26* (5), 675-692.e8.
- 574 16. Holden, J. K.; Crawford, J. J.; Noland, C. L.; Schmidt, S.; Zbieg, J. R.; Lacap, J. A.; Zang, R.;  
575 Miller, G. M.; Zhang, Y.; Beroza, P.; Reja, R.; Lee, W.; Tom, J. Y. K.; Fong, R.; Steffek, M.; Clausen,  
576 S.; Hagenbeek, T. J.; Hu, T.; Zhou, Z.; Shen, H. C.; Cunningham, C. N., Small Molecule  
577 Dysregulation of TEAD Lipidation Induces a Dominant-Negative Inhibition of Hippo Pathway  
578 Signaling. *Cell Reports* **2020**, *31* (12), 107809.
- 579 17. Tang, T. T.; Konradi, A. W.; Feng, Y.; Peng, X.; Ma, M.; Li, J.; Yu, F.-X.; Guan, K.-L.; Post,  
580 L., Small Molecule Inhibitors of TEAD Auto-palmitoylation Selectively Inhibit Proliferation and  
581 Tumor Growth of  $\text{NF2}$ -deficient Mesothelioma. *Molecular Cancer Therapeutics* **2021**, *20*  
582 (6), 986-998.
- 583 18. Bum-Erdene, K.; Zhou, D.; Gonzalez-Gutierrez, G.; Ghozayel, M. K.; Si, Y.; Xu, D.;  
584 Shannon, H. E.; Bailey, B. J.; Corson, T. W.; Pollok, K. E.; Wells, C. D.; Meroueh, S. O., Small-  
585 Molecule Covalent Modification of Conserved Cysteine Leads to Allosteric Inhibition of the  
586 TEAD·Yap Protein-Protein Interaction. *Cell Chemical Biology* **2019**, *26* (3), 378-389.e13.
- 587 19. Lu, W.; Wang, J.; Li, Y.; Tao, H.; Xiong, H.; Lian, F.; Gao, J.; Ma, H.; Lu, T.; Zhang, D.; Ye,  
588 X.; Ding, H.; Yue, L.; Zhang, Y.; Tang, H.; Zhang, N.; Yang, Y.; Jiang, H.; Chen, K.; Zhou, B.; Luo,  
589 C., Discovery and biological evaluation of vinylsulfonamide derivatives as highly potent, covalent  
590 TEAD autopalmitoylation inhibitors. *European Journal of Medicinal Chemistry* **2019**, *184*, 111767.
- 591 20. Kaneda, A.; Seike, T.; Danjo, T.; Nakajima, T.; Otsubo, N.; Yamaguchi, D.; Tsuji, Y.;  
592 Hamaguchi, K.; Yasunaga, M.; Nishiya, Y.; Suzuki, M.; Saito, J.-I.; Yatsunami, R.; Nakamura, S.;  
593 Sekido, Y.; Mori, K. The novel potent TEAD inhibitor, K-975, inhibits YAP1/TAZ-TEAD protein-  
594 protein interactions and exerts an anti-tumor effect on malignant pleural mesothelioma *Am J Cancer*  
595 *Res* [Online], 2020, p. 4399-4415. PubMed. <http://europepmc.org/abstract/MED/33415007>

- 596 <https://europepmc.org/articles/PMC7783735>
- 597 <https://europepmc.org/articles/PMC7783735?pdf=render> (accessed 2020).
- 598 21. Zhang, T.; Hatcher, J. M.; Teng, M.; Gray, N. S.; Kostic, M., Recent Advances in Selective  
599 and Irreversible Covalent Ligand Development and Validation. *Cell Chemical Biology* **2019**, *26* (11),  
600 1486-1500.
- 601 22. (a) Resnick, E.; Bradley, A.; Gan, J.; Douangamath, A.; Krojer, T.; Sethi, R.; Geurink, P. P.;  
602 Aimon, A.; Amitai, G.; Bellini, D.; Bennett, J.; Fairhead, M.; Fedorov, O.; Gabizon, R.; Gan, J.; Guo,  
603 J.; Plotnikov, A.; Reznik, N.; Ruda, G. F.; Díaz-Sáez, L.; Straub, V. M.; Szommer, T.; Velupillai, S.;  
604 Zaidman, D.; Zhang, Y.; Coker, A. R.; Dowson, C. G.; Barr, H. M.; Wang, C.; Huber, K. V. M.;  
605 Brennan, P. E.; Ovaa, H.; von Delft, F.; London, N., Rapid Covalent-Probe Discovery by  
606 Electrophile-Fragment Screening. *Journal of the American Chemical Society* **2019**, *141* (22), 8951-  
607 8968; (b) Lu, W.; Kostic, M.; Zhang, T.; Che, J.; Patricelli, M. P.; Jones, L. H.; Chouchani, E. T.;  
608 Gray, N. S., Fragment-based covalent ligand discovery. *RSC Chemical Biology* **2021**, *2*, 354-367; (c)  
609 Dubiella, C.; Pinch, B. J.; Koikawa, K.; Zaidman, D.; Poon, E.; Manz, T. D.; Nabet, B.; He, S.;  
610 Resnick, E.; Rogel, A.; Langer, E. M.; Daniel, C. J.; Seo, H.-S.; Chen, Y.; Adelmant, G.; Sharifzadeh,  
611 S.; Ficarro, S. B.; Jamin, Y.; Martins da Costa, B.; Zimmerman, M. W.; Lian, X.; Kibe, S.; Kozono, S.;  
612 Doctor, Z. M.; Browne, C. M.; Yang, A.; Stoler-Barak, L.; Shah, R. B.; Vangos, N. E.; Geffken, E. A.;  
613 Oren, R.; Koide, E.; Sidi, S.; Shulman, Z.; Wang, C.; Marto, J. A.; Dhe-Paganon, S.; Look, T.; Zhou,  
614 X. Z.; Lu, K. P.; Sears, R. C.; Chesler, L.; Gray, N. S.; London, N., Sulfopin is a covalent inhibitor of  
615 Pin1 that blocks Myc-driven tumors in vivo. *Nature Chemical Biology* **2021**, *17* (9), 954-963.
- 616 23. Yu, C.; Mannan, A. M.; Yvone, G. M.; Ross, K. N.; Zhang, Y.-L.; Marton, M. A.; Taylor, B.  
617 R.; Crenshaw, A.; Gould, J. Z.; Tamayo, P.; Weir, B. A.; Tsherniak, A.; Wong, B.; Garraway, L. A.;  
618 Shamji, A. F.; Palmer, M. A.; Foley, M. A.; Winckler, W.; Schreiber, S. L.; Kung, A. L.; Golub, T. R.,  
619 High-throughput identification of genotype-specific cancer vulnerabilities in mixtures of barcoded  
620 tumor cell lines. *Nature Biotechnology* **2016**, *34* (4), 419-423.
- 621 24. Ábrányi-Balogh, P.; Petri, L.; Imre, T.; Szijj, P.; Scarpino, A.; Hrast, M.; Mitrović, A.;  
622 Fonovič, U. P.; Németh, K.; Barreteau, H.; Roper, D. I.; Horváti, K.; Ferenczy, G. G.; Kos, J.; Ilaš, J.;

- 623 Gobec, S.; Keserű, G. M., A road map for prioritizing warheads for cysteine targeting covalent  
624 inhibitors. *European Journal of Medicinal Chemistry* **2018**, *160*, 94-107.
- 625 25. Pobbati, A. V.; Rubin, B. P., Protein-Protein Interaction Disruptors of the YAP/TAZ-TEAD  
626 Transcriptional Complex. *Molecules* **2020**, *25* (24), 6001.
- 627 26. Kuljanin, M.; Mitchell, D. C.; Schweppe, D. K.; Gikandi, A. S.; Nusinow, D. P.; Bulloch, N.  
628 J.; Vinogradova, E. V.; Wilson, D. L.; Kool, E. T.; Mancias, J. D.; Cravatt, B. F.; Gygi, S. P.,  
629 Reimagining high-throughput profiling of reactive cysteines for cell-based screening of large  
630 electrophile libraries. *Nature Biotechnology* **2021**, *39*, 630-641.
- 631 27. Kim, M.; Kim, T.; Johnson, Randy L.; Lim, D.-S., Transcriptional Co-repressor Function of  
632 the Hippo Pathway Transducers YAP and TAZ. *Cell Reports* **2015**, *11* (2), 270-282.
- 633 28. Zhou, Y.; Zhou, B.; Pache, L.; Chang, M.; Khodabakhshi, A. H.; Tanaseichuk, O.; Benner, C.;  
634 Chanda, S. K., Metascape provides a biologist-oriented resource for the analysis of systems-level  
635 datasets. *Nature Communications* **2019**, *10* (1), 1523.
- 636 29. Karaman, R.; Halder, G., Cell Junctions in Hippo Signaling. *Cold Spring Harbor*  
637 *Perspectives in Biology* **2018**, *10*:a028753.
- 638 30. Li, N.; Lu, N.; Xie, C., The Hippo and Wnt signalling pathways: crosstalk during neoplastic  
639 progression in gastrointestinal tissue. *The FEBS Journal* **2019**, *286* (19), 3745-3756.
- 640 31. Mizuno, T.; Murakami, H.; Fujii, M.; Ishiguro, F.; Tanaka, I.; Kondo, Y.; Akatsuka, S.;  
641 Toyokuni, S.; Yokoi, K.; Osada, H.; Sekido, Y., YAP induces malignant mesothelioma cell  
642 proliferation by upregulating transcription of cell cycle-promoting genes. *Oncogene* **2012**, *31* (49),  
643 5117-5122.
- 644 32. Liu, C.-Y.; Lv, X.; Li, T.; Xu, Y.; Zhou, X.; Zhao, S.; Xiong, Y.; Lei, Q.-Y.; Guan, K.-L.,  
645 PP1 Cooperates with ASPP2 to Dephosphorylate and Activate TAZ\*. *Journal of Biological*  
646 *Chemistry* **2011**, *286* (7), 5558-5566.
- 647 33. (a) Cai, D.; Feliciano, D.; Dong, P.; Flores, E.; Gruebele, M.; Porat-Shliom, N.; Sukenik, S.;  
648 Liu, Z.; Lippincott-Schwartz, J., Phase separation of YAP reorganizes genome topology for long-term  
649 YAP target gene expression. *Nature cell biology* **2019**, *21* (12), 1578-1589; (b) Lu, Y.; Wu, T.;

650 Gutman, O.; Lu, H.; Zhou, Q.; Henis, Y. I.; Luo, K., Phase separation of TAZ compartmentalizes the  
651 transcription machinery to promote gene expression. *Nature Cell Biology* **2020**, 22 (4), 453-464.

652

## 653 **EXPERIMENTAL DETAILS, METHODS AND CHARACTERIZATION** 654 **DATA**

### 655 **1.1 Cloning**

656 The stretch of residues 209-424 of human TEAD1, residues 220-450 of human TEAD2, residues 119-  
657 436 of human TEAD3, residues 216-434 of human TEAD4, were inserted into the pET28PP (N-  
658 terminal His 3C tag) vector.

### 659 **1.2 Protein expression and purification**

660 The N-terminal His tag construct of human TEAD1 (residues 209-424) was overexpressed in *E. coli*  
661 BL21 (DE3) and purified using affinity chromatography and size-exclusion chromatography. Briefly,  
662 cells were grown at 37°C in TB medium in the presence of 50 µg/ml of kanamycin to an OD of 0.8,  
663 cooled to 17°C, induced with 500 µM isopropyl-1-thio-D-galactopyranoside (IPTG), incubated  
664 overnight at 17°C, collected by centrifugation, and stored at -80°C. Cell pellets were lysed in buffer A  
665 (25 mM HEPES, pH 7.5, 200 mM NaCl, 5% glycerol, 7 mM mercapto-ethanol, and 20 mM Imidazole)  
666 using Microfluidizer (Microfluidics), and the resulting lysate was centrifuged at 30,000g for 40 min.  
667 Ni-NTA beads (Qiagen) were mixed with cleared lysate for 30 min and washed with buffer A. Beads  
668 were transferred to an FPLC-compatible column, and the bound protein was washed further with  
669 buffer A for 10 column volumes and eluted with buffer B (25 mM HEPES, pH 7.5, 200 mM NaCl, 5%  
670 glycerol, 7 mM mercapto-ethanol, and 400 mM Imidazole). The eluted sample was concentrated and  
671 purified further using a Superdex 200 16/600 column (Cytiva) in buffer C containing 20 mM HEPES,  
672 pH 7.5, 200 mM NaCl, 5% glycerol, 0.5 mM TCEP and 2 mM DTT. HRV 3C protease was added to  
673 TEAD1 containing fractions and incubated overnight at 4°C, followed by passing through Ni-NTA  
674 column to remove His-tag and 3C protease. The flow-through fractions of the second Ni-NTA column,  
675 containing cleaved TEAD1, was concentrated to ~9mg/mL and stored in -80°C. The N-terminal His

676 tag construct of human TEAD2 (residues 220-450), TEAD3 (residues 119-436) and TEAD4  
677 (residues 216-434) were purified as TEAD1.

## 678 **2 Mass spectrometry analysis**

679 TEAD2 protein (5  $\mu$ g) was treated with DMSO or a 10-fold molar excess of MYF-03-69 and analyzed  
680 by LC-MS using an HPLC system (Shimadzu, Marlborough, MA) interfaced to an LTQ ion trap mass  
681 spectrometer (ThermoFisher Scientific, San Jose, CA). Proteins were desalted for 4 minutes on  
682 column with 100% A, and eluted with an HPLC gradient (0-100% B in 1 minute; A=0.2M acetic acid  
683 in water; B=0.2M acetic acid in acetonitrile). The mass spectrometer was programmed to acquire full  
684 scan mass spectra ( $m/z$  300-2000) in profile mode (spray voltage = 4.5 kV). Mass spectra were  
685 deconvoluted using MagTran software version 1.03b2<sup>1</sup>. To analyze the site of modification, DMSO or  
686 MYF-03-69 treated proteins were first captured on SP3 beads<sup>2</sup> by adding an equal volume of  
687 acetonitrile and washed (2x with 70% acetonitrile, 1x with 100% acetonitrile). Beads were then  
688 resuspended with 100 mM ammonium bicarbonate containing 0.1% Rapigest (Waters, Milford, MA).  
689 Proteins were reduced with 10 mM DTT for 30 minutes at 56°C, alkylated with 22.5 mM  
690 iodoacetamide for 30 minutes at room temperature, and then digested overnight with trypsin at 37 °C.  
691 Rapigest was cleaved according to the manufacturer's instructions, and peptides were desalted by C18  
692 and dried by vacuum centrifugation. Peptides were reconstituted in 50% acetonitrile, 1% formic acid,  
693 100 mM ammonium acetate, and analyzed by CE-MS using a ZipChip CE-MS instrument and  
694 autosampler (908 devices, Boston, MA) interfaced to a QExactive HF mass spectrometer  
695 (ThermoFisher Scientific). Peptides were resolved at 500V/cm using an HR chip with a background  
696 electrolyte consisting of 50% acetonitrile with 1% formic acid. The mass spectrometer was operated  
697 in data dependent mode, and subjected the 5 most abundant ions in each MS scan ( $m/z$  300-2000, 60K  
698 resolution, 3E6 target, 100 ms max fill time) to MS/MS (15K resolution, 1E5 target, 100 ms max fill  
699 time). Dynamic exclusion was enabled with a repeat count of 1 and an exclusion duration of 5  
700 seconds. Raw mass spectrometry data files were converted to .mgf using multiplierz software<sup>3</sup> and  
701 searched against a forward-reverse human refseq database using Mascot version 2.6.2. Search  
702 parameters specified fixed carbamidomethylation of cysteine, variable methionine oxidation, and



703 variable MYF-03-69 modification of cysteine. MYF-03-69 modified spectra were examined and  
704 figures prepared using mzStudio software<sup>4</sup>. Inhibitor related ions in MS/MS spectra were identified as  
705 described<sup>5</sup>.

### 706 **3 Docking**

707 Docking of MYF-01-37 was performed with covalent docking protocol from Schrodinger suite  
708 software (release 2019-02) with default parameters in TEAD2 structure (PDB code: 5HGU) exporting  
709 5 poses per molecule. Both stereoisomers were docked. Top scoring pose was chosen to illustrate the  
710 binding pose. The pdb structure was processed and optimized with protein preparation protocol with  
711 default setting in Schrodinger suite.

### 712 **4.1 Crystallization**

713 Using Formulatrix NT8 and RockImager and ArtRobbins Phoenix liquid handlers, a 100 nL sample of  
714 300  $\mu$ M TEAD1 that was preincubated for 1 hour with 600  $\mu$ M MYF-03-69 was dispensed in an  
715 equal volume of crystallization buffer (3M NH<sub>4</sub>SO<sub>4</sub> and 0.1 M Tris pH 9.0) and incubated against 25  
716  $\mu$ L of crystallization buffer in a 384-well hanging-drop vapor diffusion microtiter plate at 20 °C for  
717 three days.

### 718 **4.2 Data collection and structure determination**

719 Diffraction data were collected at beamline 24ID-E of the NE-CAT at the Advanced Photon Source  
720 (Argonne National Laboratory). Data sets were integrated and scaled using XDS<sup>6</sup>. Structures were  
721 solved by molecular replacement using the program Phaser<sup>7</sup> and available search models from the  
722 PDB. Iterative manual model building and refinement using Phenix<sup>8</sup> and Coot<sup>9</sup> led to a model with  
723 excellent statistics.

### 724 **5 Gel-based palmitoylation studies**

725 1  $\mu$ M TEADs-YBD recombinant protein was incubated with inhibitors at the indicated concentrations  
726 at 37 °C for 2 h followed by the addition of palmitoyl alkyne-coenzyme A (Cayman chemical, no.  
727 15968) in a total volume of 50  $\mu$ L. After 30 min reaction, 5  $\mu$ L 10%SDS were added and 5  $\mu$ L click  
728 reagents were added to start click reaction as previously reported<sup>10</sup>. After another 1 h, 4x loading



729 buffer were added to the reaction mixture and the samples subjected for western blot analysis. IRDye  
730 800CW Streptavidin (LI-COR, no. 92632230) and His-Tag Mouse mAb (Cell Signaling, no. 2366S)  
731 was used for biotin detection and His-tag detection. The blots were imaged on Odyssey CLx Imager  
732 (LI-COR).

### 733 **6.1 Sample preparation for SLC-ABPP**

734 Samples for whole cysteine profiling were prepared as previously described<sup>11</sup>. Briefly, frozen cell  
735 pellets from H226 cells were lysed using PBS (pH 7.4). Samples were further homogenized, and  
736 DNA was sheared using sonication with a probe sonicator (20 x 0.5 s pulses) at 4°C. Total protein  
737 was determined using a BCA assay and cell lysates were used immediately for each experiment.  
738 Depending on the experiment, 50 µg of total cell extract was aliquoted for each TMT channel for  
739 further downstream processing. Excess DBIA, along with disulfide bonds were quenched and reduced  
740 using 5 mM dithiothreitol (DTT) for 30 min in the dark at room temperature. Subsequently reduced  
741 cysteine residues were alkylated using 20 mM iodoacetamide for 45 min in the dark at room  
742 temperature. To facilitate removal of quenched DBIA and incompatible reagents, proteins were  
743 precipitated using chloroform/methanol. Briefly, to 100 µL of each sample, 400 µL of methanol were  
744 added, followed by 100 µL of chloroform with thorough vortexing. Next, 300 µL of HPLC grade  
745 water were added, and the samples were mixed to facilitate precipitation. Samples were centrifuged at  
746 maximum speed (14,000 rpm) for 3 min at room temperature, the aqueous top layer was removed, and  
747 the samples were washed additionally three times with 500 µL of methanol. Protein pellets were re-  
748 solubilized in 200 mM 4-(2-hydroxyethyl)-1-piperazinepropanesulfonic acid (EPPS) at pH 8.5 and  
749 digested using LysC and trypsin (1:100, enzyme to protein ratios) overnight at 37°C using a  
750 ThermoMixer set to 1200 rpm. The next day samples were labeled with TMT reagents or stored at -  
751 80°C until further use.

### 752 **6.2 TMT Labeling for SLC-ABPP**

753 Digested peptides containing DBIA conjugated-cysteines were labeled using TMTPro 16-plex  
754 reagents as previously described<sup>12</sup>. Briefly, peptides were labeled at a 1:2 ratio by mass (peptides to  
755 TMT reagents) for 1 hr with shaking at 1,200 rpm. To equalize protein loading, ~ 2 µg of each sample

756 were aliquoted, and a 60-min quality control analysis (ratio check) was performed using SPS-MS3.  
757 Excess TMT reagent was quenched with hydroxylamine (0.3% final concentration) for 15 min at  
758 room temperature. Next, samples were mixed 1:1 across all TMT channels and the pooled sample was  
759 dried using a Speedvac to ensure all acetonitrile was removed.

### 760 **6.3 Cysteine peptide enrichment using streptavidin in SLC-ABPP**

761 Pierce streptavidin magnetic beads were washed with PBS pH 7.4 prior to use. To each TMT labeled  
762 pooled sample, 100  $\mu$ L of a 50% slurry of streptavidin beads were added. Samples were further  
763 topped up with 1 mL of PBS in a 2 mL Eppendorf tube. Samples and beads were incubated overnight  
764 at 4 °C to enrich for TMT-labeled DBIA conjugated cysteine peptides. Following enrichment, the  
765 beads were placed onto a magnetic rack and allowed to equilibrate for 5 min. Beads were washed to  
766 remove non-specific binding using the following procedure: 3 x 1 mL of PBS pH 7.4, 1 x 1 mL of  
767 PBS with 0.1% SDS pH 7.4 and finally 3 x 1 mL HPLC grade water. Beads were resuspended using  
768 a pipette between washes and placed on the magnet between each wash. To elute cysteine containing  
769 peptides, 500  $\mu$ L of 50% acetonitrile with 0.1% trifluoroacetic acid (TFA) were added, and the beads  
770 were mixed at 1,000 rpm for 15 min at room temperature. Eluted peptides were transferred to a new  
771 tube, and the beads were additionally washed with 200  $\mu$ L of 50% acetonitrile with 0.1% TFA and  
772 combined. Cysteine containing peptides were dried to completion using a Speedvac and were stored at  
773 -80°C.

### 774 **6.4 Desalting cysteine-containing peptides in SLC-ABPP**

775 TMT-labeled cysteine-containing peptides were resuspended using 200  $\mu$ L of 1% formic acid (FA)  
776 and were desalted using StageTips as previously described<sup>12a</sup>. Briefly, eight 18-gauge cores were  
777 packed into a 200  $\mu$ L pipette tip and were passivated and equilibrated using the following solutions:  
778 100  $\mu$ L of 100% methanol, 70% acetonitrile 1% FA, and 5% acetonitrile 5% FA. Peptides were  
779 loaded and were washed with 0.1% FA and eluted using 150  $\mu$ L of 70% acetonitrile 1% FA and dried  
780 to completion using a Speedvac. Enriched peptides samples were next resuspended in 5-10  $\mu$ L of 5%  
781 acetonitrile 5% FA and between 50 and 100% of the sample was injected for analysis using LC-RTS-  
782 SPS-MS3.

## 783 **6.5 Mass spectrometry and real-time searching in SLC-ABPP**

784 All SLC-ABPP mass spectrometry data were acquired using an Orbitrap Fusion Eclipse mass  
785 spectrometer in-line with a Proxeon NanoLC-1200 UPLC system. Peptides were separated using an  
786 in-house 100  $\mu\text{m}$  capillary column packed with 35 cm of Accucore 150 resin (2.6  $\mu\text{m}$ , 150  $\text{\AA}$ )  
787 (ThermoFisher Scientific) using 210 min gradients from 4 to 24% acetonitrile in 0.125% formic acid  
788 per run. Eluted peptides were quantified using the synchronous precursor selection (SPS-MS3)  
789 method for TMT quantification. Briefly, MS1 spectra were acquired at 120K resolving power with a  
790 maximum of 50 ms ion injection in the Orbitrap. MS2 spectra were acquired by selecting the top 10  
791 most abundant features via collisional induced dissociation (CID) in the ion trap using an automatic  
792 gain control (AGC) setting of 15K, quadrupole isolation width of 0.5  $m/z$  and a maximum ion  
793 accumulation time of 50 ms. These spectra were passed in real time to the external computer for  
794 online database searching. Intelligent data acquisition (IDA) using real-time searching (RTS) was  
795 performed using Obiter<sup>13</sup>. Cysteine-containing peptides or whole proteome peptide spectral matches  
796 were analyzed using the Comet search algorithm (release\_2019010) designed for spectral acquisition  
797 speed<sup>14</sup>. The same forward- and reversed-sequence human protein databases were used for both the  
798 RTS search and the final search (Uniprot). The RTS Comet functionality has been released and is  
799 available here: <http://cometms.sourceforge.net/>. Real-time access to spectral data was enabled by the  
800 Thermo Scientific Fusion API (<https://github.com/thermofisherlms/iapi>). Next, peptides were filtered  
801 using simple initial filters that included the following: not a match to a reversed sequence, maximum  
802 PPM error of <50, minimum XCorr of 0.5, minimum deltaCorr of 0.10 and minimum peptide length  
803 of 7. If peptide spectra matched to above criteria, an SPS-MS3 scan was performed using up to 10 *b*-  
804 and *y*-type fragment ions as precursors with an AGC of 200K for a maximum of 200 ms with a  
805 normalized collision energy setting of 55 (TMTPro 16-plex)<sup>12b</sup>.

## 806 **6.6 Mass spectrometry data analysis in SLC-ABPP**

807 All acquired data were searched using the open-source Comet algorithm (release\_2019010) using a  
808 previously described informatics pipeline<sup>15</sup>. Spectral searches were done using a custom FASTA-  
809 formatted database which included common contaminants, reversed sequences (Uniprot Human, 2014)

810 and the following parameters: 50 PPM precursor tolerance, fully tryptic peptides, fragment ion  
811 tolerance of 0.9 Da and a static modification by TMTPro (+304.2071 Da) on lysine and peptide N  
812 termini. Carbamidomethylation of cysteine residues (+57.021 Da) was set as a static modification  
813 while oxidation of methionine residues (+15.995 Da) and DBIA on cysteine residues (+239.262) was  
814 set as a variable modification. Peptide spectral matches were filtered to a peptide false discovery rate  
815 (FDR) of less than 1% using linear discriminant analysis employing a target-decoy strategy. Resulting  
816 peptides were further filtered to obtain a 1% protein FDR at the entire dataset level (including all  
817 plexes per cell line), and proteins were collapsed into groups. Cysteine-modified peptides were further  
818 filtered for site localization using the AScore algorithm with a cutoff of 13 ( $p < 0.05$ ) as previously  
819 described<sup>15b</sup>. Overlapping peptide sequences that were generated from different charge states, elution  
820 times and tryptic termini were grouped together into a single entry. A single quantitative value was  
821 reported, and only unique peptides were reported. Reporter ion intensities were adjusted to correct for  
822 impurities during synthesis of different TMT reagents according to the manufacturer's specifications.  
823 For quantification of each MS3 spectrum, a total sum signal-to-noise of all reporter ions of 160  
824 (TMTPro) was required. Lastly, peptide quantitative values were normalized so that the sum of the  
825 signal for all proteins in each channel was equal to account for sample loading differences (column  
826 normalization).

## 827 **6.7 SLC-ABPP competition ratio calculation**

828 Cysteine site-specific engagement was assessed by the blockage of DBIA probe labeling. Peptides  
829 that showed >95% reduction in TMT intensities in the electrophile-treated samples were assigned a  
830 maximum ratio of 20 for graphing purposes with preserved ranking. TMT reporter ion sum-signal-to-  
831 noise for each SLC-ABPP experiment was used to calculate the competition ratios by dividing the  
832 control channel (DMSO) by the electrophile treated channel. Replicate measurements were averaged  
833 and reported as a single entry. To avoid false positives, sites with large coefficients of variation had  
834 the highest replicate CR values removed before averaging as previously described<sup>11, 16</sup>.

## 835 **7.1 Cell culture**

836 HEK293T (ATCC, no. CRL-3216), NCI-H226 (ATCC, no. CRL-5826), MSTO-211H (ATCC, no.  
837 CRL-2081), NCI-H2452 (ATCC, no. CRL-5946) mesothelioma cells, MeT-5A (ATCC, no. CRL-  
838 9444) mesothelium cells, 94T778 cells (ATCC, no. CRL-3044), 93T449 cells (ATCC, no. 3043),  
839 MIA PaCa-2 cells (ATCC, no. CRM-CRL-1420), MM.1S (ATCC, no. CRL-2974) and SKHEP-1  
840 cells (ATCC, no. HTB-52) were obtained from American Type Culture Collection and cultured as  
841 recommended. HuCCT1 cells were gifts from Bardeesy lab in Massachusetts General Hospital. PC9  
842 cells were gifts from Pasi lab in Dana-Farber Cancer Institute. Cells were negative for mycoplasma  
843 using MycoAlert mycoplasma detection kit (LONZA, no. LT07-418).

## 844 **7.2 Cell proliferation assay**

845 For 2D adherent cell viability experiment, the cells were seeded at 384-well plate (Corning, no. 3570)  
846 at the density of 200 cells/well. The next day, compounds were added using Janus workstation  
847 (PerkinElmer). After 5 days treatment, the cell viability was measured by CellTiter-Glo kit (Promega,  
848 no. G7570) as the manufacturer recommended. For 3D spheroid assays, NCI-H226 and MSTO-211H  
849 cells were plated at the density of 200 cells/well in Ultra-low Attachment (ULA) plate (S-bio, no. MS-  
850 9384WZ) without or with 5% Matrigel matrix (Corning, no. 356231) respectively. The cell viability  
851 was measured using 3D CellTiter-Glo kit (Promega, no. G9681). The luminescent signal was  
852 collected on EnVision plate reader (PerkinElmer). The GR<sub>50</sub> values were calculated as previously  
853 described<sup>17</sup>.

## 854 **7.3 Cell cycle analysis**

855 Cells were plated in 6-well plate (Corning, no. 3506) and treated by MYF-03-69 at indicated  
856 concentrations. Then cells were harvested and fixed in cold 70% ethanol overnight. Next day, the  
857 samples were treated with 100 µg/mL RNAase A (Life Technologies, no. EN0531) and stained by 50  
858 µg/mL propidium iodide solution (Life Technologies, no. P3566). After incubation at room  
859 temperature for 30 min, the samples were subjected to assessment using Guava flow cytometer. The  
860 data were further analyzed in Flowjo software.

## 861 **8 PRISM screening and data analysis**

862 Up to 931 barcoded cell lines in pools of 20-25 were thawed and plated into 384-well plates (1250  
863 cells/well for adherent cell pools, 2000 cells/well for suspension or mixed suspension/adherent cell  
864 pools) containing compound (top concentration: 10  $\mu$ M, 8-point, threefold dilution). All conditions  
865 were tested in triplicate. Cells were lysed after 5 days of treatment and mRNA based Luminex  
866 detection of barcode abundance from lysates was carried out as described previously<sup>18</sup>. Luminex  
867 median fluorescence intensity (MFI) data was input to a standardized R pipeline  
868 ([https://github.com/broadinstitute/prism\\_data\\_processing](https://github.com/broadinstitute/prism_data_processing)) to generate viability estimates relative to  
869 vehicle treatment for each cell line and treatment condition, and to fit dose-response curves from  
870 viability data. Correlation analysis was also performed in the R pipeline mentioned above.

### 871 **9 TEAD reporter assays**

872 The TEAD transcriptional vector (TBS-mCherry) was used to produce lentivirus as previously  
873 reported in HEK293T cells<sup>19</sup>. The virus was collected at 48 h and 72 h post transfection and  
874 concentrated using Lenti-X concentrator (Takara Bio, no. 631231). Then NCI-H226 cells were  
875 transduced using the concentrated virus in the presence of 8  $\mu$ g/mL polybrene (MilliporeSigma, no.  
876 TR1003G). The positively transduced cells were further sorted by GFP. For reporter assays, the  
877 selected cells were plated in black 384-well plate (Corning, no. 4514) at the density of 1,000  
878 cells/well. The next day, compounds were added at indicated concentrations using Janus workstation.  
879 After 72 h incubation, the cells were stained by Hoechst 33342 (Life Technologies, no. 62249). The  
880 mCherry and Hoechst signals were read using Acumen high content imager (TTP Labtech).

881 For the luciferase reporter assay, NCI-H226 cells were transduced with 250  $\mu$ L TEAD luciferase  
882 reporter lentivirus (BPS Biosciences, no. 79833) in the presence of 8  $\mu$ g/mL polybrene  
883 (MilliporeSigma, no. TR1003G). Cells were then selected by 2  $\mu$ g/mL puromycin. The selected cells  
884 were seeded at the density of 1,000 cells/well and treated with compounds at indicated concentrations.  
885 After three days treatment, ONE-Glo<sup>TM</sup> luciferase assay kit (Promega, no. E6110) and CellTiter-Glo  
886 kit (Promega, no. G9681) were used according to manufacturer instructions. The TEAD  
887 transcriptional activity was then calculated by normalizing luciferase signal normalized with relative  
888 cell viability.

## 889 **10 Lipid displacement assay**

890 The HEK-293T cells were plated in six-well plate (Corning, no. 3506) and transfected with Myc-  
891 TEAD4 vector the next day. The Myc-TEAD4 was a gift from Kunliang Guan<sup>20</sup> (Addgene plasmid #  
892 24638; <http://n2t.net/addgene:24638>; RRID: Addgene\_24638). Then transfected cells were treated  
893 with 50  $\mu$ M alkyne palmitic acid (Click Chemistry Tools, cat. no. 1165-5) in the presence of TEAD  
894 inhibitors at indicated concentrations next day. After 24-hour incubations, cells were collected and  
895 lysed in RIPA buffer with proteasome inhibitor. The cleared supernatant was then subjected to click  
896 reactions using same procedures in the gel-based palmitoylation assay. Palmitoylation levels were  
897 detected by immunoblot using streptavidin antibody (LI-COR, no. 92632230).

## 898 **11 RT-PCR studies**

899 The cells were plated in six-well plate (Corning, no. 3506) and treated with compounds the next day.  
900 The total RNA was extracted using RNeasy Plus Mini Kit (Qiagen, no. 74134). Then 500 ng purified  
901 RNA was used to synthesize cDNA by SuperScript III First-Strand Synthesis System Kit (Life  
902 Technologies, no. 18080051). The following TaqMan probes were used for follow-up RT-PCR  
903 reactions: CTGF (Hs00170014\_m1), CYR61 (Hs00155479\_m1), GAPDH (Hs02786624\_g1), BMF  
904 (Hs00372937\_m1), IGFBP3 (Hs00181211\_m1), KRT34 (Hs02569742\_s1) and NPPB  
905 (Hs00173590\_m1).

## 906 **12 Co-immunoprecipitation (Co-IP) studies**

907 The cells were plated in 10 cm dish (Corning, no. 430293) and treated with compounds at indicated  
908 concentrations the next day. The Co-IP experiments were conducted using Dynabeads Co-  
909 Immunoprecipitation Kit (Life Technologies, no. 14321D) according to the manufacturer instructions.

### 910 **13.1 RNA-Seq study: Sample Treatment**

911 The NCI-H226 cells were plated in the 10 cm dish and treated with MYF-03-69 at indicated  
912 concentrations with biological triplicates for 6 hours next day. The RNA was extracted using RNeasy  
913 plus mini kit (Qiagen, cat no.74134) according to the manufacturer instructions.

### 914 **13.2 RNA-Seq study: Library Preparation and Sequencing**

915 Libraries were prepared using Roche Kapa mRNA HyperPrep strand specific sample preparation kits  
916 from 200 ng of purified total RNA according to the manufacturer's protocol on a Beckman Coulter  
917 Biomek i7. The finished dsDNA libraries were quantified by Qubit fluorometer and Agilent  
918 TapeStation 4200. Uniquely dual indexed libraries were pooled in an equimolar ratio and shallowly  
919 sequenced on an Illumina MiSeq to further evaluate library quality and pool balance. The final pool  
920 was sequenced on an Illumina NovaSeq 6000 targeting 40 million 100bp read pairs per library at the  
921 Dana-Farber Cancer Institute Molecular Biology Core Facilities.

### 922 **13.3 RNA-Seq study: Analysis**

923 Sequenced reads were aligned to the UCSC hg19 reference genome assembly and gene counts were  
924 quantified using STAR (v2.7.3a)<sup>21</sup>. Differential gene expression testing was performed by DESeq2  
925 (v1.22.1)<sup>22</sup>. RNAseq analysis was performed using the VIPER snakemake pipeline<sup>23</sup>. KEGG pathway  
926 enrichment analysis was performed through metaspape webportal<sup>24</sup>.

### 927 **13.4 RNA-Seq study: Datasets availability**

928 These RNA-seq datasets were deposited to BioSample database under accession# as below:  
929 SAMN19288936, SAMN19288937, SAMN19288938, SAMN19288939, SAMN19288940,  
930 SAMN19288941, SAMN19288942, SAMN19288943, SAMN19288944, SAMN19288945,  
931 SAMN19288946.

### 932 **14.1 Efficacy study in NCI-H226 CDX model: Animals**

933 Female 7-week-old NSG mice were purchased from The Jackson Laboratory (Bar Harbor, ME).  
934 Animals acclimated for at least 5 days before initiation of the study. All *in vivo* studies were  
935 conducted at Dana-Farber Cancer Institute with the approval of the Institutional Animal Care and Use  
936 Committee in an AAALAC accredited vivarium.

### 937 **14.2 Efficacy study in NCI-H226 CDX model: *In vivo* studies**

938 The NCI-H226 cells were grown in RPMI1640 media supplemented with 10% fetal bovine serum.  
939 Cells were harvested, and  $5 \times 10^6$  cells with 50% Matrigel (Fisher Scientific) were implanted  
940 subcutaneously in the right flank of the NSG mice. Tumors were allowed to establish to an average of  
941  $141.3 \pm 24.9 \text{ mm}^3$  in size before randomization using Studylog software (San Francisco, CA) into



942 various treatment groups with 8-9 mice per group. MYF-03-176 was formulated as a suspension in 10%  
943 DMSO with 10% Tween 80 in water and dosed twice daily via oral gavage. Control treated mice  
944 received vehicle alone. Tumor volumes were determined from caliper measurements by using the  
945 formula, Tumor volume = (length × width<sup>2</sup>)/2. Tumor volumes and body weights were measured  
946 twice weekly. Mice were treated for 28 days, followed by measuring for re-growth of tumors.

## 947 15 Chemical synthesis and characterization

948

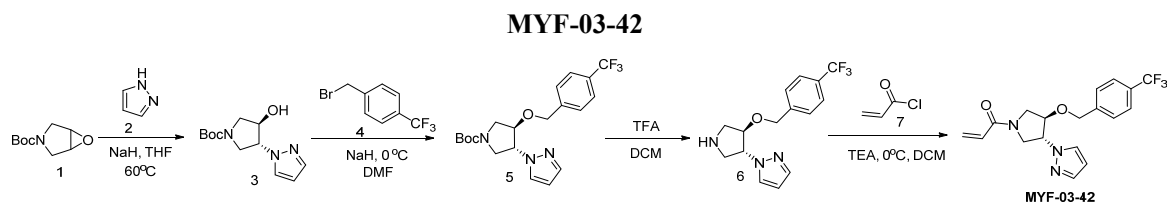

949  
950

### 951 Step 1: Synthesis of *trans*-tert-butyl 3-hydroxy-4-(1H-pyrazol-1-yl)pyrrolidine-1-carboxylate 952 (Compound 3)

953 To a suspension of 60% NaH (323mg, 8.1 mmol) in THF (20 mL) was added the solution of 1H-  
954 pyrazole (551 mg, 8.1 mmol) in THF (5 mL), the mixture was stirred at 0 °C under N<sub>2</sub> for 30 minutes,  
955 and then tert-butyl 6-oxa-3-azabicyclo[3.1.0] hexane-3-carboxylate (1.0 g, 5.4 mmol) was added. The  
956 resulting mixture was heated at 60°C under N<sub>2</sub> for 16 hours. After cooled down to room temperature  
957 the mixture was diluted with ethyl acetate (50 mL) and washed with water (50 mL). The organic layer  
958 was dried over anhydrous Na<sub>2</sub>SO<sub>4</sub>, filtered, concentrated and purified by flash column  
959 chromatography on silica gel (ethyl acetate in petroleum ether = 40% v/v) to afford compound 3 as  
960 solid (600 mg, yield 44%). LC-MS (ESI) m/z: 254 [M+H]<sup>+</sup>.

961

### 962 Step 2: Synthesis of *trans*-tert-butyl 3-(1H-pyrazol-1-yl)-4-(4-(trifluoromethyl)benzyloxy)pyrrolidine-1-carboxylate (Compound 5)

964 A mixture of compound 3 (300 mg, 1.18 mmol), 1-(bromomethyl)-4-(trifluoromethyl)benzene (283  
965 mg, 1.18 mmol) and 60% NaH (47 mg, 1.18 mmol) in DMF (10 mL) was stirred at room temperature  
966 under N<sub>2</sub> for 2 hours. The mixture was diluted with water (50 mL) and extracted with ethyl acetate (50  
967 mL x 2), the combined organic was washed with brine (50 mL), dried over anhydrous Na<sub>2</sub>SO<sub>4</sub>, filtered  
968 and concentrated to obtain compound 5 as yellow oil (400 mg, yield 82%). LC-MS (ESI) m/z: 356  
969 [M-56+H]<sup>+</sup>.

970

### 971 Step 3: Synthesis of 1-(*trans*-4-(4-(trifluoromethyl)benzyloxy)pyrrolidin-3-yl)-1H-pyrazole 972 (Compound 6)

973 A mixture of compound 5 (300 mg, 0.72 mmol) and TFA (3 mL) in DCM (10 mL) was stirred at room

974 temperature for 2 hours. The mixture was concentrated to leave crude compound **6** (250 mg) as  
975 yellow oil, which was used directly in the next step. LC-MS (ESI)  $m/z$ : 312[M+H]<sup>+</sup>.

976

977 **Step 4: Synthesis of 1-(trans-3-(1H-pyrazol-1-yl)-4-(4-(trifluoromethyl)benzyloxy)pyrrolidin-1-yl)prop-2-en-1-one (MYF-03-42)**

979 A mixture of compound **6** (70 mg, 0.22 mmol), acryloyl chloride (20 mg, 0.22 mmol), and TEA (44  
980 mg, 0.44mmol) in DCM (10 mL) was stirred at room temperature under N<sub>2</sub> for 2 hours. The mixture  
981 was concentrated, the residue was purified by prep-HPLC to afford **MYF-03-42** as yellow oil (50 mg,  
982 yield 62%). LC-MS (ESI)  $m/z$ : 366[M+H]<sup>+</sup>.

983 <sup>1</sup>H-NMR (400 MHz, CD<sub>3</sub>OD): δ (ppm) 7.74 (dd,  $J$  = 5.2, 2.4 Hz, 1H), 7.63 (d,  $J$  = 8.0 Hz, 2H), 7.56  
984 (d,  $J$  = 1.6 Hz, 1H), 7.47 (d,  $J$  = 8.1 Hz, 2H), 6.66-6.59 (dd,  $J$  = 16.8, 10.4 Hz, 1H), 6.36-6.30 (m, 2H),  
985 5.85 – 5.74 (m, 1H), 5.18 – 5.02 (m, 1H), 4.68 (d,  $J$  = 5.8 Hz, 2H), 4.51-4.42 (m, 1H), 4.28-4.08 (m,  
986 2H), 4.01-3.93 (m, 1H), 3.83-3.65 (m, 1H).

987

988

**MYF-02-111**

989 **MYF-02-111** was synthesized through the same route as **MYF-03-42** except 1-(bromomethyl)-3-  
990 (trifluoromethyl)benzene was used in **Step 2** instead of 1-(bromomethyl)-4-(trifluoromethyl)benzene.

991 **MYF-02-111** was obtained as light yellow oil. LC-MS (ESI)  $m/z$ : 366[M+H]<sup>+</sup>. <sup>1</sup>H NMR (500 MHz,  
992 DMSO-*d*<sub>6</sub>) δ 7.87 (ddd,  $J$  = 9.3, 2.3, 0.7 Hz, 1H), 7.69 – 7.54 (m, 4H), 7.53 – 7.48 (m, 1H), 6.61 (dd,  $J$   
993 = 16.8, 10.3 Hz, 1H), 6.30 (dt,  $J$  = 3.4, 2.1 Hz, 1H), 6.17 (dt,  $J$  = 16.7, 2.5 Hz, 1H), 5.70 (td,  $J$  = 9.9,  
994 2.3 Hz, 1H), 5.13 (ddt,  $J$  = 33.6, 7.8, 3.4 Hz, 1H), 4.66 (d,  $J$  = 4.0 Hz, 2H), 4.39 (ddd,  $J$  = 25.5, 4.1,  
995 1.7 Hz, 1H), 4.19 – 4.09 (m, 0.5H), 4.07 – 3.87 (m, 1.5H), 3.86 – 3.70 (m, 1.5H), 3.52 (dd,  $J$  = 13.0,  
996 4.0 Hz, 0.5H).

997

998

**MYF-03-69**

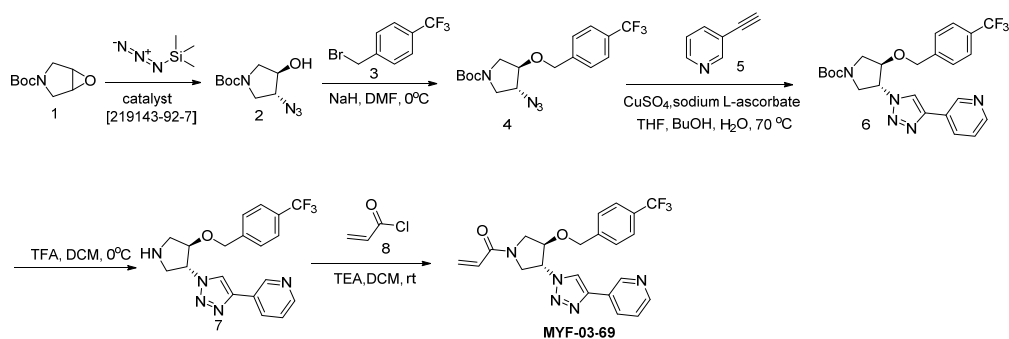

999

1000 **Step 1: Synthesis of (3R, 4R)-tert-butyl 3-azido-4-hydroxypyrrolidine-1-carboxylate (Compound**  
1001 **2)**

1002 A mixture of tert-butyl 6-oxa-3-azabicyclo[3.1.0]hexane-3-carboxylate (4 g, 21.6 mmol), TMSN<sub>3</sub>  
1003 (2.664 g, 23.2 mmol) and chiral catalyst (*1S,2S*)-(-)-[1,2-cyclohexanediamino-N,N'-bis(3,5-di-t-

1004 butylsalicylidene)]chromium(III) chloride (328 mg, 0.42 mmol) was stirred at rt under N<sub>2</sub> overnight.  
1005 The reaction mixture was treated with MeOH (60 mL) and K<sub>2</sub>CO<sub>3</sub> (1.788 g, 12.8 mmol) and  
1006 continued to stir at rt for 5 hours. The reaction mixture was diluted with ethyl acetate (300 mL),  
1007 washed with water (300 mL x 2), dried over anhydrous Na<sub>2</sub>SO<sub>4</sub>, concentrated and purified by flash  
1008 column chromatography on silica gel (ethyl acetate in petroleum ether = 30% v/v) to obtain the  
1009 compound **2** as clear oil (3.5g, 96% e.e., yield 71%). LC-MS (ESI) m/z: 129 [M+H-100]<sup>+</sup>.

1010

1011 **Step 2: Synthesis of (3R, 4R)-tert-butyl 3-azido-4-(4-(trifluoromethyl)benzyloxy)pyrrolidine-1-**  
1012 **carboxylate (Compound 4)**

1013 A mixture of compound **2** (3 g, 13.1 mmol), 1-(bromomethyl)-4-(trifluoromethyl)benzene (3.1 g, 13.1  
1014 mmol) and 60% NaH (0.6 g, 15.7 mmol) in DMF (20 mL) was stirred at 0 °C under N<sub>2</sub> for 6 hours.  
1015 The reaction mixture was diluted with water (200 mL) and extracted with ethyl acetate (200 mL), the  
1016 organic was washed with water (100 mL), dried over anhydrous Na<sub>2</sub>SO<sub>4</sub>, concentrated and purified by  
1017 flash column chromatography on silica gel (ethyl acetate in petroleum ether = 20% v/v) to obtain  
1018 compound **4** as oil (3.8g, yield 75%). LC-MS (ESI) m/z: 287[M+H-100]<sup>+</sup>.

1019

1020 **Step 3: Synthesis of (3R, 4R)-tert-butyl 3-(4-(pyridin-3-yl)-1H-1,2,3-triazol-1-yl)-4-(4-**  
1021 **(trifluoromethyl)benzyloxy)pyrrolidine-1-carboxylate (Compound 6)**

1022 A mixture of compound **4** (3.8 g, 9.8 mmol), 3-ethynylpyridine (1.216 g, 11.8 mmol), CuSO<sub>4</sub> (244  
1023 mg, 0.98 mmol) and, sodium L-ascorbate (388 mg, 1.96 mmol) in THF (20 mL), H<sub>2</sub>O (20 mL) and  
1024 <sup>n</sup>BuOH (20 mL) was stirred at 70 °C under N<sub>2</sub> overnight. The reaction mixture was concentrated in  
1025 vacuum, the residue was diluted with ethyl acetate (600 mL), washed with water (400 mL), dried over  
1026 anhydrous Na<sub>2</sub>SO<sub>4</sub>, concentrated and purified by flash column chromatography on silica gel (ethyl  
1027 acetate in petroleum ether = 90% v/v) to obtain compound **6** as yellow solid (4g, yield 83%). LC-MS  
1028 (ESI) m/z: 490[M+H]<sup>+</sup>.

1029

1030 **Step 4: Synthesis of 3-(1-((3R, 4R)-4-(4-(trifluoromethyl)benzyloxy)pyrrolidin-3-yl)-1H-1,2,3-**  
1031 **triazol-4-yl)pyridine (Compound 7)**

1032 A mixture of compound **6** (4 g, 8.1 mmol) and TFA (5 mL) in DCM (20 mL) was stirred at 0 °C under  
1033 N<sub>2</sub> for 2 hours. The mixture was concentrated to leave the crude compound **7** (4 g, crude) as yellow  
1034 oil, which was used directly for next step. LC-MS (ESI) m/z: 390[M+H]<sup>+</sup>.

1035

1036 **Step 5: Synthesis of 1-((3R, 4R)-3-(4-(pyridin-3-yl)-1H-1,2,3-triazol-1-yl)-4-(4-**  
1037 **(trifluoromethyl)benzyloxy)pyrrolidin-1-yl)prop-2-en-1-one (MYF-03-69)**

1038 A mixture of compound **7** (500 mg, 1.28 mmol), acryloyl chloride (115 mg, 1.28 mmol) and TEA  
1039 (388 mg, 3.84 mmol) in DCM (20 mL) was stirred at rt for 2 hours. The mixture was concentrated and  
1040 purified by prep-HPLC to obtain **MYF-03-69** as light yellow solid (300 mg, yield 52%). LC-MS

1041 (ESI)  $m/z$ : 444  $[M+H]^+$ .  $^1H$  NMR (400 MHz,  $CD_3OD$ )  $\delta$  (ppm) 8.91 (d,  $J = 1.8$  Hz, 1H), 8.50 (d,  $J =$   
1042 4.9 Hz, 1H), 8.43 (d,  $J = 4.9$  Hz, 1H), 8.18 (dt,  $J = 8.0, 1.8$  Hz, 1H), 7.51 (d,  $J = 8.0$  Hz, 2H), 7.48-  
1043 7.38 (m, 3H), 6.60-6.49 (m, 1H), 6.23 (dd,  $J = 16.8, 1.9$  Hz, 1H), 5.75-5.67 (m, 1H), 5.41 – 5.30 (m,  
1044 1H), 4.68 (d,  $J = 4.0$  Hz, 2H), 4.60-4.49 (m, 1H), 4.32 – 4.16 (m, 1H), 4.15-3.87 (m, 2H), 3.85 – 3.63  
1045 (m, 1H).

1046

1047

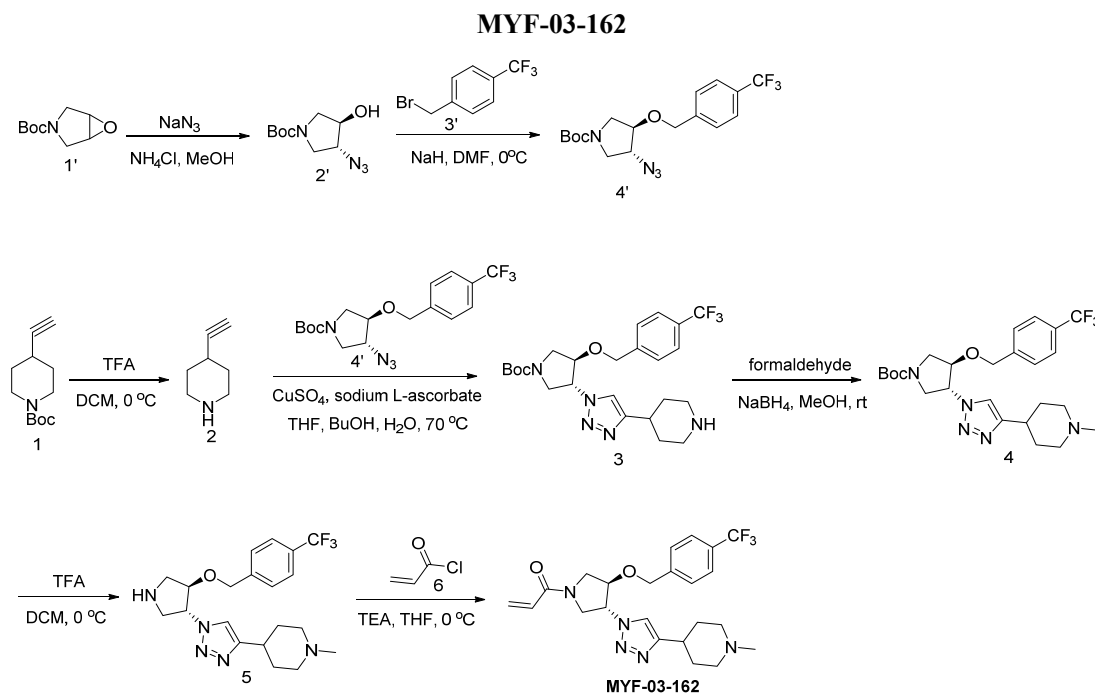

1048

### 1049 Step 1: Synthesis of Compound 2'

1050 A mixture of tert-butyl 6-oxa-3-azabicyclo[3.1.0]hexane-3-carboxylate (10 g, 54 mmol),  $NaN_3$  (7g,  
1051 108 mmol) and  $NH_4Cl$  (2.8g, 54 mmol) in MeOH (120 mL) and  $H_2O$  (20 mL) was stirred at 65°C  
1052 under  $N_2$  overnight. The reaction mixture was concentrated in vacuum, the residue was extracted with  
1053 ethyl acetate (300 mL x 3), the combined organic was washed with water (200 mL x2), dried over  
1054 anhydrous  $Na_2SO_4$ , concentrated and purified by flash column chromatography on silica gel (ethyl  
1055 acetate in petroleum ether = 20% v/v) to obtain compound 2' (11 g, yield 89%) as oil. LC-MS (ESI)  
1056  $m/z$ : 129  $[M+H-100]^+$ .

1057

### 1058 Step 2: Synthesis of Compound 4'

1059 A mixture of compound 2' (3g, 13.1 mmol), 1-(bromomethyl)-4-(trifluoromethyl)benzene (3.1g,  
1060 13.1mmol) and 60% NaH (0.6g, 15.7 mmol) in DMF (20 mL) was stirred at rt under  $N_2$  protection for  
1061 6 hours. The reaction mixture was diluted with water (100 mL) and extracted with ethyl acetate (100  
1062 mL x 2), the combined organic was washed with water (100 mL), dried over anhydrous  $Na_2SO_4$ ,  
1063 concentrated and purified by flash column chromatography on silica gel (ethyl acetate in petroleum  
1064 ether = 30% v/v) to obtain compound 4' (3.8g, yield 75%) as oil. LC-MS (ESI)  $m/z$ : 287  $[M+H-$

1065 100]<sup>+</sup>.

1066

1067 **Step 3: Synthesis of 4-ethynylpiperidine (Compound 2)**

1068 A mixture of tert-butyl 4-ethynylpiperidine-1-carboxylate (1000 mg, 4.7 mmol) and TFA (0.5 mL) in  
1069 DCM (1 mL) was stirred at rt under N<sub>2</sub> protection for 2 hours. The mixture was concentrated to leave  
1070 the crude compound **2** (1.2 g) as white solid, which was used directly in the next step. LC-MS (ESI)  
1071 m/z: 110 [M+H]<sup>+</sup>.

1072

1073 **Step 4: Synthesis of *trans*-tert-butyl 3-(4-(piperidin-4-yl)-1H-1,2,3-triazol-1-yl)-4-(4-**  
1074 **(trifluoromethyl)benzyloxy)pyrrolidine-1-carboxylate (Compound 3)**

1075 A mixture of compound **4'** (200 mg, 0.52 mmol), compound **2** (113 mg, 1.04 mmol), CuSO<sub>4</sub> (48 mg,  
1076 0.3 mmol) and sodium L-ascorbate (28 mg, 0.14 mmol) in THF (1 mL), H<sub>2</sub>O (1 mL) and <sup>n</sup>BuOH (1  
1077 mL) was stirred at 70 °C under N<sub>2</sub> overnight. The reaction mixture was concentrated in vacuum, the  
1078 residue was diluted with water (50 mL) and extracted with ethyl acetate (20 mL x 2), the combined  
1079 organic was washed with brine (20 mL), dried over anhydrous Na<sub>2</sub>SO<sub>4</sub>, concentrated and purified by  
1080 flash column chromatography on silica gel (ethyl acetate in petroleum ether = 90% v/v) to obtain  
1081 compound **3** as yellow solid (200 mg, yield 78%). LC-MS (ESI) m/z: 496[M+H]<sup>+</sup>.

1082

1083 **Step 5: Synthesis of *trans*-tert-butyl 3-(4-(1-methylpiperidin-4-yl)-1H-1,2,3-triazol-1-yl)-4-(4-**  
1084 **(trifluoromethyl)benzyloxy)pyrrolidine-1-carboxylate (Compound 4)**

1085 A mixture of compound **3** (100 mg, 0.2 mmol) and formaldehyde (10 mg, 0.3 mmol) and NaBH<sub>4</sub> (20  
1086 mg, 0.4 mmol) in MeOH (10 mL) was stirred at rt for 2 hours. The resulting mixture was concentrated  
1087 and purified by flash column chromatography on silica gel (ethyl acetate in petroleum ether = 80%  
1088 v/v) to obtain compound **4** as oil (70 mg, yield 69%). LC-MS (ESI) m/z: 510[M+H]<sup>+</sup>.

1089

1090 **Step 6: Synthesis of 1-methyl-4-(1-(*trans*-4-(4-(trifluoromethyl)benzyloxy)pyrrolidin-3-yl)-1H-**  
1091 **1,2,3-triazol-4-yl)piperidine (Compound 5)**

1092 A mixture of compound **4** (70 mg, 0.13 mmol) and TFA (0.5 mL) in DCM (1 mL) was stirred at rt  
1093 under N<sub>2</sub> for 2 hours. The mixture was concentrated to leave the crude compound **5** (50 mg) as yellow  
1094 oil, which was used directly in the next step. LC-MS (ESI) m/z: 410[M+H]<sup>+</sup>.

1095

1096 **Step 7: Synthesis of 1-(*trans*-3-(4-(1-methylpiperidin-4-yl)-1H-1,2,3-triazol-1-yl)-4-(4-**  
1097 **(trifluoromethyl)benzyloxy)pyrrolidin-1-yl)prop-2-en-1-one (Compound MYF-03-162)**

1098 To the mixture of compound **5** (50 mg, 0.12 mmol) and TEA (30 mg, 0.24 mmol) in DCM (10 mL)  
1099 was added acryloyl chloride (20 mg, 0.12 mmol), the mixture was stirred at rt under N<sub>2</sub> for 2 hours,  
1100 and then concentrated and purified by prep-HPLC to obtain compound **MYF-03-162** as white solid  
1101 (13 mg, yield 23%). LC-MS (ESI) m/z: 464 [M+H]<sup>+</sup>.; <sup>1</sup>H NMR (400 MHz, CD<sub>3</sub>OD) δ (ppm) 7.89 (d,

1102  $J = 3.6$  Hz, 1H), 7.63 (d,  $J = 8.1$  Hz, 2H), 7.49(d,  $J = 8.1$  Hz, 2H), 6.61 (dd,  $J = 16.8, 10.4$  Hz, 1H),  
1103 6.31 (dd,  $J = 16.8, 1.8$  Hz, 1H), 5.78 (ddd,  $J = 10.4, 3.6, 1.9$  Hz, 1H), 5.39 – 5.27 (m, 1H), 4.73 (d,  $J =$   
1104 4.6 Hz, 2H), 4.61-4.50 (m, 1H), 4.34 – 4.10 (m, 2H), 4.09-3.69 (m, 2H), 2.94 (d,  $J = 11.6$  Hz, 2H),  
1105 2.80-2.68 (m, 1H), 2.31 (s, 3H), 2.24 – 2.12 (m, 2H), 2.08 – 1.98 (m, 2H), 1.80-1.65 (m, 2H).

1106

1107

### MYF-03-139

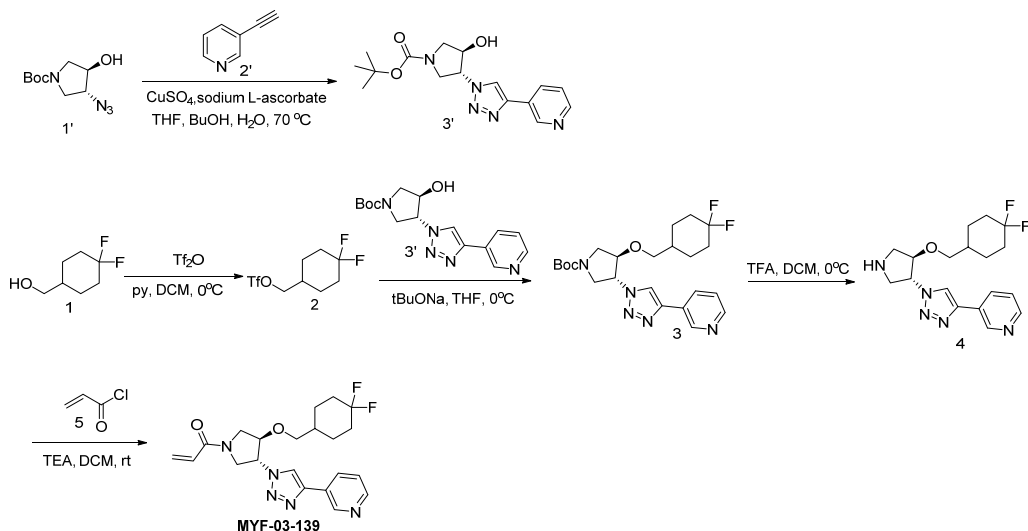

1109

#### Step 1: Synthesis of *trans*-tert-butyl 3-hydroxy-4-(4-(pyridin-3-yl)-1H-1,2,3-triazol-1-yl)pyrrolidine-1-carboxylate (Compound 3')

1110

1111 A mixture of tert-butyl compound **1'** (1 g, 4.38 mmol), 3-ethynylpyridine (451 mg, 4.38 mmol),  
1112 CuSO<sub>4</sub> (654 mg, 2.6 mmol) and sodium L-ascorbate (257 mg, 1.3 mmol) in THF (3 mL), H<sub>2</sub>O (3 mL)  
1113 and <sup>n</sup>BuOH (3 mL) was stirred at 70 °C under N<sub>2</sub> protection overnight. The reaction mixture was  
1114 diluted with ethyl acetate (60mL), washed with water (40 mL), dried over anhydrous Na<sub>2</sub>SO<sub>4</sub>,  
1115 concentrated and purified by flash column chromatography on silica gel (ethyl acetate in petroleum  
1116 ether = 80% v/v) to obtain compound **3'** (650 mg, yield 45%) as yellow solid. LC-MS (ESI) m/z:  
1117 332[M+H]<sup>+</sup>.

1118

#### Step 2: Synthesis of (4,4-difluorocyclohexyl)methyl trifluoromethanesulfonate (Compound 2)

1119

1120 A mixture of (4,4-difluorocyclohexyl)methanol (1 g, 6.6 mmol), Tf<sub>2</sub>O (2.81 g, 9.9 mmol) and pyridine  
1121 (1 mL) in DCM (20 mL) was stirred at rt under N<sub>2</sub> protection for 3 hours. The reaction mixture was  
1122 diluted with ethyl acetate (100 mL), washed with water (100 mL x 2), dried over anhydrous Na<sub>2</sub>SO<sub>4</sub>,  
1123 filtered and concentrated to leave the crude compound **2** (500 mg) as yellow oil, which was used  
1124 directly in the next step. LC-MS (ESI) m/z: no MS.

1125

#### Step 3: Synthesis of *trans*-tert-butyl 3-((4,4-difluorocyclohexyl)methoxy)-4-(4-(pyridin-3-yl)-1H-1,2,3-triazol-1-yl)pyrrolidine-1-carboxylate (Compound 3)

1127

1128 A mixture of compound **2** (200 mg, 0.7 mmol), compound **3'** (58 mg, 0.175 mmol) and <sup>t</sup>BuONa (25  
1129 mg, 0.26 mmol) in THF (5 mL) was stirred at 0 °C under N<sub>2</sub> for 2 hours. The reaction mixture was  
1130 diluted with ethyl acetate (50 mL), washed with water (50 mL x 2), dried over anhydrous Na<sub>2</sub>SO<sub>4</sub>,  
1131 concentrated and purified by flash column chromatography on silica gel (ethyl acetate in petroleum  
1132 ether = 50% v/v) to obtain compound **3** as oil (100 mg, yield 30%). LC-MS (ESI) m/z: 464[M+H]<sup>+</sup>.

1133

1134 **Step 4: Synthesis of 3-(1-(trans-4-((4,4-difluorocyclohexyl)methoxy)pyrrolidin-3-yl)-1H-1,2,3-**  
1135 **triazol-4-yl)pyridine (Compound 4)**

1136 A mixture of compound **3** (50 mg, 0.1 mmol) and TFA (1 mL) in DCM (3 mL) was stirred at rt for 2  
1137 hours. The mixture was concentrated to leave the crude compound **4** (50 mg) as yellow oil, which was  
1138 used directly in the next step. LC-MS (ESI) m/z: 364[M+H]<sup>+</sup>.

1139

1140 **Step 5: Synthesis of 1-(trans-3-((4,4-difluorocyclohexyl)methoxy)-4-(4-(pyridin-3-yl)-1H-1,2,3-**  
1141 **triazol-1-yl)pyrrolidin-1-yl)prop-2-en-1-one (Compound MYF-03-139)**

1142 A mixture of compound **4** (50 mg, 0.1 mmol), acryloyl chloride (10 mg, 0.1 mmol), and TEA (20 mg,  
1143 0.2 mmol) in DCM (5 mL) was stirred at rt under N<sub>2</sub> for 2 hours. The mixture was diluted with DCM  
1144 (50 mL), washed with water (50 mL x 2), dried over anhydrous Na<sub>2</sub>SO<sub>4</sub>, concentrated and purified by  
1145 prep-HPLC to obtain **MYF-03-139** as white solid (16 mg, yield 38%). LC-MS (ESI) m/z:  
1146 418[M+H]<sup>+</sup>; <sup>1</sup>H-NMR (400 MHz, CD<sub>3</sub>OD) δ (ppm) 8.91 (d, *J* = 1.2 Hz, 1H), 8.55 – 8.40 (m, 2H),  
1147 8.18 (dt, *J* = 8.0, 1.9 Hz, 1H), 7.43 (dd, *J* = 8.0, 4.9 Hz, 1H), 6.55 (ddd, *J* = 16.8, 10.4, 2.5 Hz, 1H),  
1148 6.28 – 6.20 (m, 1H), 5.70 (ddd, *J* = 10.5, 4.7, 1.9 Hz, 1H), 5.29 – 5.18 (m, 1H), 4.43 – 4.32 (m, 1H),  
1149 4.27 – 4.16 (m, 1H), 4.07 – 3.37 (m, 5H), 1.91 (ddd, *J* = 13.9, 7.0, 3.5 Hz, 2H), 1.76 – 1.54 (m, 5H),  
1150 1.26 – 1.13 (m, 2H).

1151

1152

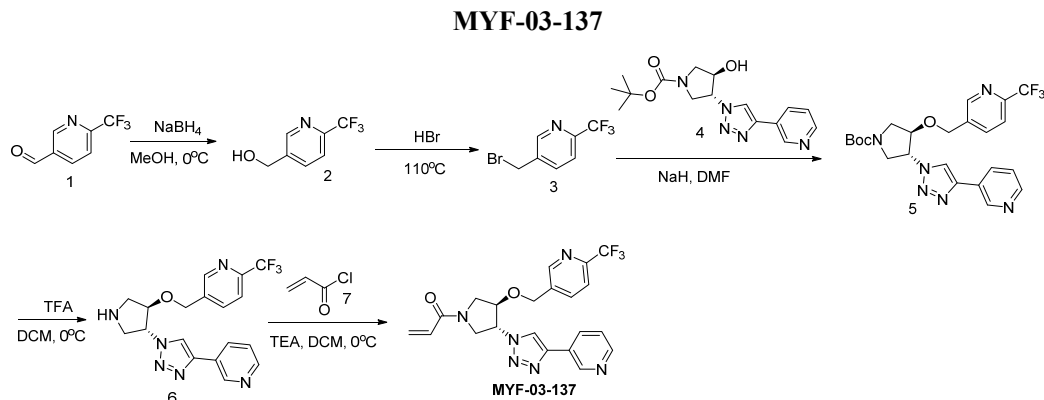

1154 **Step 1: Synthesis of (6-(trifluoromethyl)pyridin-3-yl)methanol (Compound 2)**

1155 A mixture of 6-(trifluoromethyl)nicotinaldehyde (170 mg, 1 mmol) and NaBH<sub>4</sub> (76 mg, 2 mmol) in  
1156 MeOH (3 mL) was stirred at 0 °C for 3 hours. The reaction mixture was concentrated in vacuum, the  
1157 residue was extracted with ethyl acetate (60 mL), washed with water (40 mL), dried over anhydrous



1158 Na<sub>2</sub>SO<sub>4</sub>, filtered and concentrated to leave the crude product (150 mg, yield 84%) as oil, which was  
1159 used directly in the next step. LC-MS (ESI) m/z: 178[M+H]<sup>+</sup>.

1160

1161 **Step 2: Synthesis of 5-(bromomethyl)-2-(trifluoromethyl)pyridine (Compound 3)**

1162 A mixture of compound **2** (400 mg, 2.2 mmol) and 48% aqueous HBr solution (6 mL) was stirred at  
1163 110 °C overnight. The reaction mixture was concentrated in vacuum, the residue was diluted with  
1164 ethyl acetate (60 mL), washed with water (40 mL), dried over anhydrous Na<sub>2</sub>SO<sub>4</sub>, concentrated and  
1165 purified by flash column chromatography on silica gel (ethyl acetate in petroleum ether = 20% v/v) to  
1166 obtain compound **3** as oil (200 mg, yield 38%). LC-MS (ESI) m/z: 240[M+H]<sup>+</sup>.

1167

1168 **Step 3: Synthesis of *trans*-tert-butyl 3-(4-(pyridin-3-yl)-1H-1,2,3-triazol-1-yl)-4-((6-**  
1169 **(trifluoromethyl)pyridin-3-yl)methoxy)pyrrolidine-1-carboxylate (Compound 5)**

1170 A mixture of compound **3** (100 mg, 0.4 mmol), compound **4** (140 mg, 0.4 mmol) and 60% NaH (32  
1171 mg, 0.8 mmol) in DMF (5 mL) was stirred at rt under N<sub>2</sub> overnight. The reaction mixture was diluted  
1172 with water (100 mL) and extracted with ethyl acetate (20 mL x 2), the combined organic was washed  
1173 with water (50 mL), dried over anhydrous Na<sub>2</sub>SO<sub>4</sub>, concentrated and purified by flash column  
1174 chromatography on silica gel (ethyl acetate in petroleum ether = 90% v/v) to obtain compound **5** as  
1175 solid (100 mg, yield 51%). LC-MS (ESI) m/z: 491[M+H]<sup>+</sup>.

1176

1177 **Step 4: Synthesis of 5-((*trans*-4-(4-(pyridin-3-yl)-1H-1,2,3-triazol-1-yl)pyrrolidin-3-**  
1178 **yl)oxy)methyl)-2-(trifluoromethyl)pyridine (Compound 6)**

1179 A mixture of compound **5** (100 mg, 0.2 mmol) and TFA (1 mL) in DCM (3 mL) was stirred at rt for 2  
1180 hours. The mixture was concentrated to leave the crude compound **6** (100 mg, crude) as yellow oil,  
1181 which was used directly in the next step. LC-MS (ESI) m/z: 391

1182

1183 **Step 5: Synthesis of 1-(*trans*-3-(4-(pyridin-3-yl)-1H-1,2,3-triazol-1-yl)-4-((6-**  
1184 **(trifluoromethyl)pyridin-3-yl)methoxy)pyrrolidin-1-yl)prop-2-en-1-one (Compound MYF-03-**  
1185 **137)**

1186 A mixture of compound **6** (50 mg, 0.125 mmol), acryloyl chloride (15 mg, 0.125 mmol) and TEA (25  
1187 mg, 0.25 mmol) in DCM (3 mL) was stirred at 0 °C for 2 hours. The mixture was concentrated and  
1188 purified by prep-HPLC to obtain **MYF-03-137** as white solid (5 mg, yield 9%). LC-MS (ESI) m/z:  
1189 445. <sup>1</sup>H NMR (400 MHz, CD<sub>3</sub>OD) δ (ppm) 9.04 (d, *J* = 2.2 Hz, 1H), 8.76 – 8.50 (m, 3H), 8.31 (dt, *J* =  
1190 7.9, 1.9 Hz, 1H), 8.03 (d, *J* = 8.2 Hz, 1H), 7.80 (d, *J* = 8.1 Hz, 1H), 7.56 (dd, *J* = 8.0, 4.9 Hz, 1H),  
1191 6.67 (ddd, *J* = 16.8, 10.4, 3.5 Hz, 1H), 6.36 (dd, *J* = 16.8, 1.7 Hz, 1H), 5.83 (ddd, *J* = 10.5, 5.1, 1.9  
1192 Hz, 1H), 5.58 – 5.44 (m, 1H), 4.97 (s, 2H), 4.81 – 4.68 (m, 1H), 4.48 – 4.03 (m, 3H), 4.02 – 3.80 (m,  
1193 1H).

1194

1195

### MYF-03-138

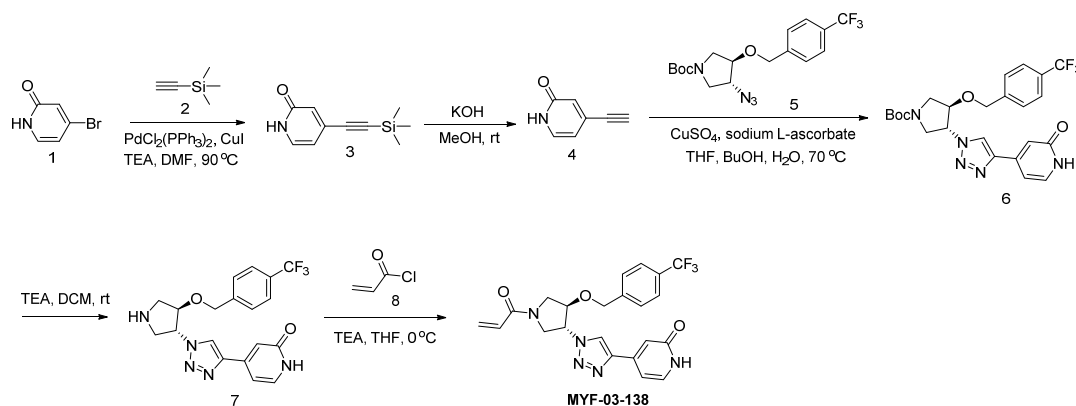

1196

#### 1197 Step 1: Synthesis of 4-((trimethylsilyl)ethynyl)pyridin-2(1H)-one (Compound 3)

1198 To the solution of ethynyltrimethylsilane (0.595 g, 6.07 mmol) in DMF (40 mL) was added 4-  
1199 bromopyridin-2(1H)-one (1 g, 5.8 mmol), PdCl<sub>2</sub>(PPh<sub>3</sub>)<sub>2</sub> (0.204 g, 0.29 mmol), CuI (55 mg, 0.29  
1200 mmol) and Et<sub>3</sub>N (1.17 g, 11.6 mmol). The mixture was stirred at 90 °C under N<sub>2</sub> for 2 hours. After  
1201 cooled down to rt the mixture was diluted with water (200 mL) and extracted with EtOAc (50 mL x  
1202 2), the combined organic was dried over anhydrous Na<sub>2</sub>SO<sub>4</sub>, concentrated and purified by flash  
1203 column chromatography on silica gel (ethyl acetate in petroleum ether = 50% v/v) to obtain  
1204 compound 3 as oil (500 mg, yield 45.4%). LC-MS (ESI) m/z: 192[M+H]<sup>+</sup>.

1205

#### 1206 Step 2: Synthesis of 4-ethynylpyridin-2(1H)-one (Compound 4)

1207 To the solution of compound 3 (450 mg, 2.35 mmol) in MeOH (20 mL) was added KOH (263 mg,  
1208 4.70 mmol). The mixture was stirred at rt under N<sub>2</sub> for 2 hours. The resulted mixture was concentrated  
1209 and purified by flash column chromatography on silica gel (ethyl acetate in petroleum ether = 90%  
1210 v/v) to obtain compound 4 as oil (200 mg, yield 71.4%). LC-MS (ESI) m/z: 120[M+H]<sup>+</sup>.

1211

#### 1212 Step 3: Synthesis of *trans*-tert-butyl 3-(4-(2-oxo-1,2-dihydropyridin-4-yl)-1H-1,2,3-triazol-1- 1213 yl)-4-(4-(trifluoromethyl)benzyloxy)pyrrolidine-1-carboxylate (Compound 6)

1214 To the solution of compound 5 (250 mg, 0.65 mmol) in THF (10mL), H<sub>2</sub>O (10mL) and <sup>n</sup>BuOH  
1215 (10mL) was added compound 4 (116 mg, 0.97 mmol), CuSO<sub>4</sub> (15 mg, 0.065 mmol) and sodium L-  
1216 ascorbate (26 mg, 0.13 mmol). The mixture was stirred at 70 °C under N<sub>2</sub> for 16 hours. The resulting  
1217 mixture was concentrated and purified by flash column chromatography on silica gel (methanol in  
1218 dichloromethane = 20% v/v) to obtain compound 6 as solid (200 mg, yield 60%). LC-MS (ESI) m/z:  
1219 506[M+H]<sup>+</sup>.

1220

#### 1221 Step 4: Synthesis of 4-(1-(*trans*-4-(4-(trifluoromethyl)benzyloxy)pyrrolidin-3-yl)-1H-1,2,3- 1222 triazol-4-yl)pyridin-2(1H)-one (Compound 7)

1223 To the solution of compound **6** (180 mg, 0.36 mmol) in DCM (10 mL) was added TFA (2 mL). The  
1224 mixture was stirred at rt for 2 hours and concentrated in vacuum, the residue was adjusted to pH~8  
1225 with NaHCO<sub>3</sub> solution and extracted with EtOAc (50 mL x 3), the combined organics were washed  
1226 with brine (100 mL), dried over anhydrous Na<sub>2</sub>SO<sub>4</sub>, filtered and concentrated to leave crude  
1227 compound **7** as oil (150 mg, crude). LC-MS (ESI) m/z: 406[M+H]<sup>+</sup>.

1228

1229 **Step 5: Synthesis of 4-(1-(trans-1-acryloyl-4-(4-(trifluoromethyl)benzyloxy)pyrrolidin-3-yl)-**  
1230 **1H-1,2,3-triazol-4-yl)pyridin-2(1H)-one (Compound MYF-03-138)**

1231 To the solution of compound **7** (130 mg, 0.32 mmol) in THF (10 mL) was added acryloyl chloride (29  
1232 mg, 0.32 mmol) and Et<sub>3</sub>N (65 mg, 0.64 mmol). The mixture was stirred at 0°C for 1 hour, and then  
1233 concentrated and purified by prep-HPLC to obtain compound **MYF-03-138** as solid (44 mg, yield  
1234 30.0%). LC-MS (ESI) m/z: 460[M+H]<sup>+</sup>. <sup>1</sup>H-NMR (400 MHz, DMSO-*d*<sub>6</sub>) δ (ppm) 11.58 (br, 1H), 8.89  
1235 (d, *J* = 5.5 Hz, 1H), 7.70 (d, *J* = 8.0 Hz, 2H), 7.54 (d, *J* = 8.0 Hz, 2H), 7.46 (d, *J* = 6.6 Hz, 1H), 6.79  
1236 (s, 1H), 6.70 – 6.56 (m, 2H), 6.24 – 6.14 (m, 1H), 5.79-5.71 (m, 1H), 5.53 – 5.39 (m, 1H), 4.81 – 4.71  
1237 (m, 2H), 4.62-4.50 (m, 1H), 4.30-4.13 (m, 1H), 4.12-3.95 (m, 1H), 3.91-3.79 (m, 1H), 3.68-3.58 (m,  
1238 1H).

1239

1240

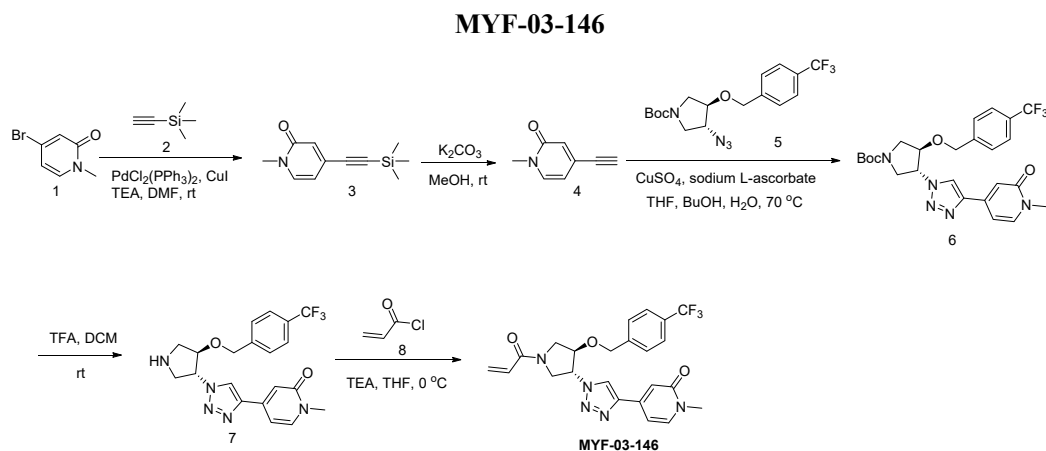

1241

1242 **Step 1: Synthesis of 1-methyl-4-((trimethylsilyl)ethynyl)pyridin-2(1H)-one (Compound 3)**

1243 To the solution of 4-bromo-1-methylpyridin-2(1H)-one (1 g, 5.3 mmol) in DMF (20 mL) was added  
1244 ethynyltrimethylsilane (0.55 g, 5.6 mmol), PdCl<sub>2</sub>(PPh<sub>3</sub>)<sub>2</sub> (0.21 g, 0.3 mmol), CuI (0.06 g, 0.3 mmol)  
1245 and Et<sub>3</sub>N (1.07 g, 10.6 mmol). The mixture was stirred at room temperature under N<sub>2</sub> for 2 hours. The  
1246 resulting mixture was concentrated and purified by flash column chromatography on silica gel (ethyl  
1247 acetate in petroleum ether = 50% v/v) to obtain compound **3** as oil (1.1 g, yield 99.9%). LC-MS (ESI)  
1248 m/z: 206[M+H]<sup>+</sup>.

1249

1250 **Step 2: Synthesis of 4-ethynyl-1-methylpyridin-2(1H)-one (Compound 4)**

1251 To the solution of compound **3** (1 g, 4.9 mmol) in MeOH (20 mL) was added K<sub>2</sub>CO<sub>3</sub> (1.35 g, 9.8

1252 mmol). The mixture was stirred at room temperature under N<sub>2</sub> for 2 hours. The resulting mixture was  
1253 concentrated and purified by flash column chromatography on silica gel (ethyl acetate in petroleum  
1254 ether = 90% v/v) to obtain compound **4** as solid (400 mg, yield 56.1%). LC-MS (ESI) m/z:  
1255 134[M+H]<sup>+</sup>.

1256

1257 **Step 3: Synthesis of *trans*-tert-butyl 3-(4-(1-methyl-2-oxo-1,2-dihydropyridin-4-yl)-1H-1,2,3-**  
1258 **triazol-1-yl)-4-(4-(trifluoromethyl)benzyloxy)pyrrolidine-1-carboxylate (Compound 6)**

1259 To the solution of *trans*-tert-butyl 3-azido-4-(4-(trifluoromethyl)benzyloxy) pyrrolidine-1-carboxylate  
1260 (350 mg, 0.91 mmol) in THF (5mL), H<sub>2</sub>O (5mL) and <sup>n</sup>BuOH (5mL) was added compound **4** (181 mg,  
1261 1.36 mmol), CuSO<sub>4</sub> (23 mg, 0.09 mmol) and sodium L-ascorbate (36 mg, 0.18 mmol). The mixture  
1262 was stirred at 70 °C under N<sub>2</sub> for 16 hours. The resulting mixture was concentrated and purified by  
1263 flash column chromatography on silica gel (methanol in dichloromethane=20% v/v) to obtain  
1264 compound **6** as solid (300 mg, yield 63.5%). LC-MS (ESI) m/z: 520[M+H]<sup>+</sup>.

1265

1266 **Step 4: Synthesis of 1-methyl-4-(1-(*trans*-4-(4-(trifluoromethyl)benzyloxy)pyrrolidin-3-yl)-1H-**  
1267 **1,2,3-triazol-4-yl)pyridin-2(1H)-one (Compound 7)**

1268 To the solution of compound **6** (280 mg, 0.54 mmol) in DCM (10 mL) was added TFA (2 mL). The  
1269 mixture was stirred at room temperature for 2 hours and concentrated in vacuum, the residue was  
1270 adjusted to pH~8 with NaHCO<sub>3</sub> solution and extracted with EtOAc (50 mL x 3), the combined  
1271 organics were washed with brine (100 mL), dried over anhydrous Na<sub>2</sub>SO<sub>4</sub>, filtered and concentrated to  
1272 leave the crude compound **7** as oil (200 mg, crude). LC-MS (ESI) m/z: 420[M+H]<sup>+</sup>.

1273

1274 **Step 5: Synthesis of 4-(1-(*trans*-1-acryloyl-4-(4-(trifluoromethyl)benzyloxy)pyrrolidin-3-yl)-1H-**  
1275 **1,2,3-triazol-4-yl)-1-methylpyridin-2(1H)-one (Compound MYF-03-146)**

1276 To the solution of compound **7** (180 mg, 0.43 mmol) in THF (10 mL) was added acryloyl chloride (39  
1277 mg, 0.43 mmol) and Et<sub>3</sub>N (87 mg, 0.86 mmol). The mixture was stirred at 0°C under N<sub>2</sub> for 1 hour,  
1278 and then concentrated and purified by prep-HPLC to obtain compound **MYF-03-146** as solid (215  
1279 mg, yield 95.5%). LC-MS (ESI) m/z: 474[M+H]<sup>+</sup>. <sup>1</sup>H-NMR (400 MHz, DMSO-*d*<sub>6</sub>): δ (ppm) 8.89 (d, *J*  
1280 = 5.8 Hz, 1H), 7.78 (d, *J* = 7.1 Hz, 1H), 7.70 (d, *J* = 8.2 Hz, 2H), 7.53 (d, *J* = 8.1 Hz, 2H), 6.85 (s,  
1281 1H), 6.76 – 6.53 (m, 2H), 6.19 (dd, *J* = 16.8, 2.3 Hz, 1H), 5.73 (ddd, *J* = 10.2, 5.1, 2.3 Hz, 1H), 5.47  
1282 (d, *J* = 25.4 Hz, 1H), 4.75 (s, 2H), 4.57 (d, *J* = 24.5 Hz, 1H), 4.31 – 3.57 (m, 4H), 3.44 (s, 3H).

1283

1284

**MYF-03-135**

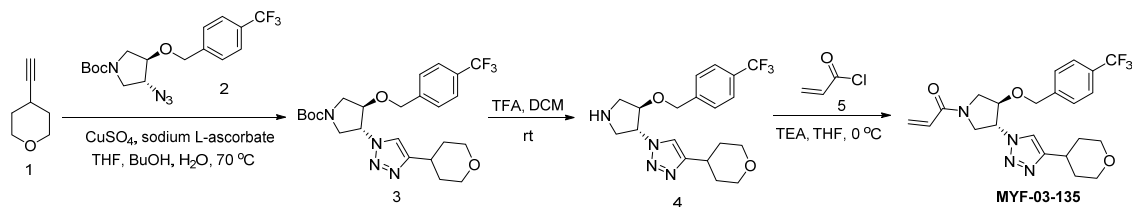

1285

1286 **Step 1: Synthesis of *trans*-tert-butyl 3-(4-(tetrahydro-2H-pyran-4-yl)-1H-1,2,3-triazol-1-yl)-4-(4-**  
1287 **(trifluoromethyl)benzyloxy)pyrrolidine-1-carboxylate (Compound 3)**

1288 To the solution of compound 2 (300 mg, 0.78 mmol) in THF (10 mL), H<sub>2</sub>O (10 mL) and <sup>n</sup>BuOH (10  
1289 mL) was added 4-ethynyltetrahydro-2H-pyran (128 mg, 1.16 mmol), CuSO<sub>4</sub> (20 mg, 0.078 mmol)  
1290 and sodium L-ascorbate (31 mg, 0.156 mmol). The mixture was stirred at 70 °C under N<sub>2</sub> for 16  
1291 hours. The resulting mixture was concentrated and purified by flash column chromatography on silica  
1292 gel (Methanol in dichloromethane = 20% v/v) to obtain compound 3 as solid (300 mg, yield 77.9%).  
1293 LC-MS (ESI) m/z: 497 [M+H]<sup>+</sup>.

1294

1295 **Step 2: Synthesis of 4-(tetrahydro-2H-pyran-4-yl)-1-(*trans*-4-(4-**  
1296 **(trifluoromethyl)benzyloxy)pyrrolidin-3-yl)-1H-1,2,3-triazole (Compound 4)**

1297 To the solution of compound 3 (280 mg, 0.56 mmol) in DCM (10 mL) was added TFA (2 mL). The  
1298 mixture was stirred at room temperature for 2 hours and concentrated in vacuum, the residue was  
1299 adjusted to pH~8 with NaHCO<sub>3</sub> solution and extracted with EtOAc (50 mL x 3), the combined  
1300 organics were washed with brine (100 mL), dried over anhydrous Na<sub>2</sub>SO<sub>4</sub>, filtered and concentrated to  
1301 leave the crude compound 4 as oil (250 mg, crude). LC-MS (ESI) m/z: 397 [M+H]<sup>+</sup>.

1302

1303 **Step 3: Synthesis of 1-(*trans*-3-(4-(tetrahydro-2H-pyran-4-yl)-1H-1,2,3-triazol-1-yl)-4-(4-**  
1304 **(trifluoromethyl)benzyloxy)pyrrolidin-1-yl)prop-2-en-1-one (Compound MYF-03-135)**

1305 To the solution of compound 4 (230 mg, 0.58 mmol) in THF (10 mL) was added acryloyl chloride (52  
1306 mg, 0.58 mmol) and Et<sub>3</sub>N (117 mg, 1.16 mmol). The mixture was stirred at 0°C under N<sub>2</sub> for 1 hour,  
1307 and then concentrated and purified by prep-HPLC to obtain compound MYF-03-135 as solid (180  
1308 mg, yield 69.0%). LC-MS (ESI) m/z: 451[M+H]<sup>+</sup>. <sup>1</sup>H-NMR (400 MHz, DMSO-*d*<sub>6</sub>): δ (ppm) 8.05 (d, *J* =  
1309 = 6.6 Hz, 1H), 7.70 (d, *J* = 7.6 Hz, 2H), 7.51 (d, *J* = 7.8 Hz, 2H), 6.66 – 6.57 (m, 1H), 6.18 (d, *J* =  
1310 16.8 Hz, 1H), 5.77 – 5.67 (m, 1H), 5.43 – 5.29 (m, 1H), 4.72 (d, *J* = 5.2 Hz, 2H), 4.50 (dd, *J* = 31.4,  
1311 5.0 Hz, 1H), 4.24 – 3.96 (m, 2H), 3.89 (d, *J* = 13.1 Hz, 2H), 3.82 (td, *J* = 13.1, 4.4 Hz, 1H), 3.58 (dd,  
1312 *J* = 13.1, 3.3 Hz, 1H), 3.44 (t, *J* = 11.3 Hz, 2H), 2.93 (t, *J* = 10.6 Hz, 1H), 1.85 (d, *J* = 12.9 Hz, 2H),  
1313 1.61 (q, *J* = 11.4 Hz, 2H).

1314

1315

**MYF-03-176**

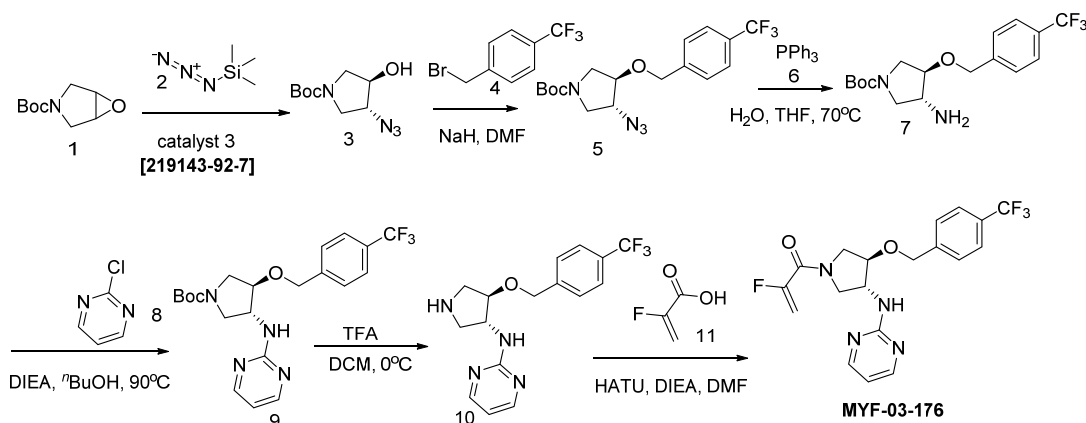

1316

**1317 Step 1: Synthesis of (3R,4R)-tert-butyl 3-azido-4-hydroxypyrrolidine-1-carboxylate (Compound**  
**1318 3)**

1319 A mixture of compound 1 (4000mg, 21.6mmol), compound 2 (2664mg, 23.2mmol) and catalyst 3  
1320 (328mg, 0.42mmol) was stirred at rt for overnight under N<sub>2</sub> protection. The reaction mixture was  
1321 treated with MeOH (60mL) and K<sub>2</sub>CO<sub>3</sub> (1788mg, 12.8mmol) and continued to stirring for 5h. The  
1322 reaction mixture was extracted with ethyl acetate (300mL x 3), and washed by water (300 mL x 2).  
1323 The organic layer was dried over Na<sub>2</sub>SO<sub>4</sub> and concentrated. The residue was purified by flash column  
1324 chromatography on silica gel (ethyl acetate in petroleum ether = 20% v/v) to obtain 3.5 g product  
1325 compound 3 as yellow oil (3.5g, yield 71%). LC-MS (ESI) m/z: 129[M+H]<sup>+</sup>.

**1326 Step 2: Synthesis of (3R,4R)-tert-butyl 3-azido-4-(4-(trifluoromethyl)benzyloxy)pyrrolidine-1-**  
**1327 carboxylate (Compound 5)**

1328 A mixture of compound 3 (500mg, 2.19 mmol), compound 4 (524mg, 2.19mmol) and NaH (105mg,  
1329 2.62 mmol) in THF (10 mL) was stirred at rt for 6h under N<sub>2</sub> protection. The reaction mixture was  
1330 monitored by LC-MS. The reaction mixture was extracted with ethyl acetate (100mL), and washed by  
1331 water (50mL). The organic layer was dried over Na<sub>2</sub>SO<sub>4</sub>, was concentrated and purified by column  
1332 chromatography on silica gel (ethyl acetate in petroleum ether = 30% v/v) to obtain 600mg product  
1333 compound 5 as white oil (600mg, yield 95%). LC-MS (ESI) m/z: 287[M+ H]<sup>+</sup>.

**1334 Step 3: Synthesis of (3R,4R)-tert-butyl 3-amino-4-(4-(trifluoromethyl)benzyloxy)pyrrolidine-1-**  
**1335 carboxylate (Compound 7)**

1336 A mixture of compound 5 (1000mg, 2.58 mmol), PPh<sub>3</sub> (814mg, 3.1mmol) and H<sub>2</sub>O (930mg, 51.6  
1337 mmol) in THF (40 mL) was stirred at 70 °C for 5h under N<sub>2</sub> protection. The reaction mixture was  
1338 monitored by LC-MS. The reaction mixture was extracted with ethyl acetate (300mL), and washed by  
1339 water (200mL), The organic layer was dried over Na<sub>2</sub>SO<sub>4</sub>, concentrated and purified by p-HPLC to  
1340 obtain 800mg product compound 7 as yellow oil (800mg, yield 86%). LC-MS (ESI) m/z: 261[M+H-  
1341 100]<sup>+</sup>.

**1342 Step 4: Synthesis of (3R,4R)-tert-butyl 3-(pyrimidin-2-ylamino)-4-(4-**

1343 **(trifluoromethyl)benzyloxy)pyrrolidine-1-carboxylate (Compound 9)**

1344 A mixture of compound **7** (600 mg, 1.6mmol), compound **8** (240 mg, 1.84mmol) and DIPEA (420mg,  
1345 3.24 mmol) in *n*BuOH (6 mL) was stirred at 70 °C for overnight under N<sub>2</sub> protection. The reaction  
1346 mixture was monitored by LC-MS. The reaction mixture was concentrated and purified by p-HPLC to  
1347 obtain 500mg product compound **9** as white oil (500mg, yield 71%). LC-MS (ESI) m/z: 439[M+H]<sup>+</sup>.

1348 **Step 5: Synthesis of N-((3R,4R)-4-(4-(trifluoromethyl)benzyloxy)pyrrolidin-3-yl)pyrimidin-2-**  
1349 **amine (Compound 10)**

1350 A mixture of compound **9** (400mg, 0.91 mmol) and TFA (1mL) in DCM (3 mL) was stirred at rt for  
1351 2h under N<sub>2</sub> protection. The mixture was concentrated to obtain 300mg crude of compound **10** as  
1352 yellow oil. Used for next step (400mg, yield 97%). LC-MS (ESI) m/z: 339[M+H]<sup>+</sup>.

1353 **Step 6: Synthesis of 2-fluoro-1-((3R,4R)-3-(pyrimidin-2-ylamino)-4-(4-**  
1354 **(trifluoromethyl)benzyloxy)pyrrolidin-1-yl)prop-2-en-1-one (MYF-03-176)**

1355 A mixture of compound **10** (200mg, 0.58 mmol), compound **11** (60mg, 0.69mmol) and HATU  
1356 (256mg, 0.69 mmol) and DIEA (224mg, 1.74mmol) in DMF (5 mL) was stirred rt for overnight under  
1357 N<sub>2</sub> protection. The reaction mixture was monitored by LC-MS. The reaction mixture was concentrated  
1358 and purified by p-HPLC to obtain 150mg product **MYF-03-176** as white solid (150mg, yield 63%).  
1359 LC-MS (ESI) m/z: 411[M+H]<sup>+</sup>. <sup>1</sup>H NMR (400 MHz, MeOD) δ 8.44 (s, 2H), 7.82 – 7.50 (m, 4H),  
1360 6.83 (dd, J = 8.3, 4.9 Hz, 1H), 5.50 (dt, J = 47.1, 3.3 Hz, 1H), 5.27 (dt, J = 16.5, 3.4 Hz, 1H), 4.82 (dd,  
1361 J = 13.3, 8.8 Hz, 2H), 4.68 – 4.57 (m, 1H), 4.28 – 3.67 (m, 5H).

1362

1363 **16 References**

- 1364 1. Zhang, Z.; Marshall, A. G., A universal algorithm for fast and automated charge state  
1365 deconvolution of electrospray mass-to-charge ratio spectra. *Journal of the American Society for Mass*  
1366 *Spectrometry* **1998**, *9* (3), 225-233.
- 1367 2. Hughes, C. S.; Foehr, S.; Garfield, D. A.; Furlong, E. E.; Steinmetz, L. M.; Krijgsveld, J.,  
1368 Ultrasensitive proteome analysis using paramagnetic bead technology. *Molecular Systems Biology*  
1369 **2014**, *10* (10), 757.
- 1370 3. Alexander, W. M.; Ficarro, S. B.; Adelmant, G.; Marto, J. A., multiplierz v2.0: A Python-  
1371 based ecosystem for shared access and analysis of native mass spectrometry data. *PROTEOMICS*  
1372 **2017**, *17* (15-16), 1700091.
- 1373 4. Ficarro, S. B.; Alexander, W. M.; Marto, J. A., mzStudio: A Dynamic Digital Canvas for  
1374 User-Driven Interrogation of Mass Spectrometry Data. *Proteomes* **2017**, *5* (3), 20.
- 1375 5. Ficarro, S. B.; Browne, C. M.; Card, J. D.; Alexander, W. M.; Zhang, T.; Park, E.; McNally,  
1376 R.; Dhe-Paganon, S.; Seo, H.-S.; Lamberto, I.; Eck, M. J.; Buhrlage, S. J.; Gray, N. S.; Marto, J. A.,  
1377 Leveraging Gas-Phase Fragmentation Pathways for Improved Identification and Selective Detection  
1378 of Targets Modified by Covalent Probes. *Analytical Chemistry* **2016**, *88* (24), 12248-12254.



- 1379 6. Kabsch, W., Integration, scaling, space-group assignment and post-refinement. *Acta*  
1380 *crystallographica. Section D, Biological crystallography* **2010**, 66 (Pt 2), 133-44.
- 1381 7. McCoy, A. J.; Grosse-Kunstleve, R. W.; Adams, P. D.; Winn, M. D.; Storoni, L. C.; Read, R.  
1382 J., Phaser crystallographic software. *Journal of applied crystallography* **2007**, 40 (Pt 4), 658-674.
- 1383 8. Adams, P. D.; Afonine, P. V.; Bunkoczi, G.; Chen, V. B.; Davis, I. W.; Echols, N.; Headd, J.  
1384 J.; Hung, L. W.; Kapral, G. J.; Grosse-Kunstleve, R. W.; McCoy, A. J.; Moriarty, N. W.; Oeffner, R.;  
1385 Read, R. J.; Richardson, D. C.; Richardson, J. S.; Terwilliger, T. C.; Zwart, P. H., PHENIX: a  
1386 comprehensive Python-based system for macromolecular structure solution. *Acta crystallographica.*  
1387 *Section D, Biological crystallography* **2010**, 66 (Pt 2), 213-21.
- 1388 9. Emsley, P.; Cowtan, K., Coot: model-building tools for molecular graphics. *Acta*  
1389 *crystallographica. Section D, Biological crystallography* **2004**, 60 (Pt 12 Pt 1), 2126-32.
- 1390 10. Lu, W.; Wang, J.; Li, Y.; Tao, H.; Xiong, H.; Lian, F.; Gao, J.; Ma, H.; Lu, T.; Zhang, D.; Ye,  
1391 X.; Ding, H.; Yue, L.; Zhang, Y.; Tang, H.; Zhang, N.; Yang, Y.; Jiang, H.; Chen, K.; Zhou, B.; Luo,  
1392 C., Discovery and biological evaluation of vinylsulfonamide derivatives as highly potent, covalent  
1393 TEAD autopalmitoylation inhibitors. *European Journal of Medicinal Chemistry* **2019**, 184, 111767.
- 1394 11. Kuljanin, M.; Mitchell, D. C.; Schweppe, D. K.; Gikandi, A. S.; Nusinow, D. P.; Bulloch, N.  
1395 J.; Vinogradova, E. V.; Wilson, D. L.; Kool, E. T.; Mancias, J. D.; Cravatt, B. F.; Gygi, S. P.,  
1396 Reimagining high-throughput profiling of reactive cysteines for cell-based screening of large  
1397 electrophile libraries. *Nature Biotechnology* **2021**, 39, 630-641.
- 1398 12. (a) Navarrete-Perea, J.; Yu, Q.; Gygi, S. P.; Paulo, J. A., Streamlined Tandem Mass Tag (SL-  
1399 TMT) Protocol: An Efficient Strategy for Quantitative (Phospho)proteome Profiling Using Tandem  
1400 Mass Tag-Synchronous Precursor Selection-MS3. *Journal of Proteome Research* **2018**, 17 (6), 2226-  
1401 2236; (b) Li, J.; Van Vranken, J. G.; Pontano Vaites, L.; Schweppe, D. K.; Huttlin, E. L.; Etienne, C.;  
1402 Nandhikonda, P.; Viner, R.; Robitaille, A. M.; Thompson, A. H.; Kuhn, K.; Pike, I.; Bomgarden, R.  
1403 D.; Rogers, J. C.; Gygi, S. P.; Paulo, J. A., TMTpro reagents: a set of isobaric labeling mass tags  
1404 enables simultaneous proteome-wide measurements across 16 samples. *Nature Methods* **2020**, 17 (4),  
1405 399-404.
- 1406 13. Schweppe, D. K.; Eng, J. K.; Yu, Q.; Bailey, D.; Rad, R.; Navarrete-Perea, J.; Huttlin, E. L.;  
1407 Erickson, B. K.; Paulo, J. A.; Gygi, S. P., Full-Featured, Real-Time Database Searching Platform  
1408 Enables Fast and Accurate Multiplexed Quantitative Proteomics. *Journal of Proteome Research* **2020**,  
1409 19 (5), 2026-2034.
- 1410 14. (a) Eng, J. K.; Hoopmann, M. R.; Jahan, T. A.; Egertson, J. D.; Noble, W. S.; MacCoss, M. J.,  
1411 A Deeper Look into Comet—Implementation and Features. *Journal of The American Society for*  
1412 *Mass Spectrometry* **2015**, 26 (11), 1865-1874; (b) Eng, J. K.; Jahan, T. A.; Hoopmann, M. R., Comet:  
1413 An open-source MS/MS sequence database search tool. *PROTEOMICS* **2013**, 13 (1), 22-24.
- 1414 15. (a) McAlister, G. C.; Huttlin, E. L.; Haas, W.; Ting, L.; Jedrychowski, M. P.; Rogers, J. C.;  
1415 Kuhn, K.; Pike, I.; Grothe, R. A.; Blethrow, J. D.; Gygi, S. P., Increasing the Multiplexing Capacity of

- 1416 TMTs Using Reporter Ion Isotopologues with Isobaric Masses. *Analytical Chemistry* **2012**, *84* (17),  
1417 7469-7478; (b) Beausoleil, S. A.; Villén, J.; Gerber, S. A.; Rush, J.; Gygi, S. P., A probability-based  
1418 approach for high-throughput protein phosphorylation analysis and site localization. *Nature*  
1419 *Biotechnology* **2006**, *24* (10), 1285-1292; (c) Elias, J. E.; Gygi, S. P., Target-decoy search strategy for  
1420 increased confidence in large-scale protein identifications by mass spectrometry. *Nature Methods*  
1421 **2007**, *4* (3), 207-214; (d) Huttlin, E. L.; Jedrychowski, M. P.; Elias, J. E.; Goswami, T.; Rad, R.;  
1422 Beausoleil, S. A.; Villén, J.; Haas, W.; Sowa, M. E.; Gygi, S. P., A Tissue-Specific Atlas of Mouse  
1423 Protein Phosphorylation and Expression. *Cell* **2010**, *143* (7), 1174-1189.
- 1424 16. Backus, K. M.; Correia, B. E.; Lum, K. M.; Forli, S.; Horning, B. D.; González-Páez, G. E.;  
1425 Chatterjee, S.; Lanning, B. R.; Teijaro, J. R.; Olson, A. J.; Wolan, D. W.; Cravatt, B. F., Proteome-  
1426 wide covalent ligand discovery in native biological systems. *Nature* **2016**, *534* (7608), 570-574.
- 1427 17. Hafner, M.; Niepel, M.; Chung, M.; Sorger, P. K., Growth rate inhibition metrics correct for  
1428 confounders in measuring sensitivity to cancer drugs. *Nature Methods* **2016**, *13* (6), 521-527.
- 1429 18. Corsello, S. M.; Nagari, R. T.; Spangler, R. D.; Rossen, J.; Kocak, M.; Bryan, J. G.; Humeidi,  
1430 R.; Peck, D.; Wu, X.; Tang, A. A.; Wang, V. M.; Bender, S. A.; Lemire, E.; Narayan, R.;  
1431 Montgomery, P.; Ben-David, U.; Garvie, C. W.; Chen, Y.; Rees, M. G.; Lyons, N. J.; McFarland, J.  
1432 M.; Wong, B. T.; Wang, L.; Dumont, N.; O'Hearn, P. J.; Stefan, E.; Doench, J. G.; Harrington, C. N.;  
1433 Greulich, H.; Meyerson, M.; Vazquez, F.; Subramanian, A.; Roth, J. A.; Bittker, J. A.; Boehm, J. S.;  
1434 Mader, C. C.; Tsherniak, A.; Golub, T. R., Discovering the anticancer potential of non-oncology  
1435 drugs by systematic viability profiling. *Nature Cancer* **2020**, *1* (2), 235-248.
- 1436 19. Mohseni, M.; Sun, J.; Lau, A.; Curtis, S.; Goldsmith, J.; Fox, V. L.; Wei, C.; Frazier, M.;  
1437 Samson, O.; Wong, K.-K.; Kim, C.; Camargo, F. D., A genetic screen identifies an LKB1-MARK  
1438 signalling axis controlling the Hippo-YAP pathway. *Nature Cell Biology* **2014**, *16* (1), 108-117.
- 1439 20. Li, Z.; Zhao, B.; Wang, P.; Chen, F.; Dong, Z.; Yang, H.; Guan, K.-L.; Xu, Y., Structural  
1440 insights into the YAP and TEAD complex. *Genes & Development* **2010**, *24* (3), 235-240.
- 1441 21. Dobin, A.; Davis, C. A.; Schlesinger, F.; Drenkow, J.; Zaleski, C.; Jha, S.; Batut, P.; Chaisson,  
1442 M.; Gingeras, T. R., STAR: ultrafast universal RNA-seq aligner. *Bioinformatics* **2012**, *29* (1), 15-21.
- 1443 22. Love, M. I.; Huber, W.; Anders, S., Moderated estimation of fold change and dispersion for  
1444 RNA-seq data with DESeq2. *Genome Biology* **2014**, *15* (12), 550.
- 1445 23. Cornwell, M.; Vangala, M.; Taing, L.; Herbert, Z.; Köster, J.; Li, B.; Sun, H.; Li, T.; Zhang, J.;  
1446 Qiu, X.; Pun, M.; Jeselsohn, R.; Brown, M.; Liu, X. S.; Long, H. W., VIPER: Visualization Pipeline  
1447 for RNA-seq, a Snakemake workflow for efficient and complete RNA-seq analysis. *BMC*  
1448 *Bioinformatics* **2018**, *19* (1), 135.
- 1449 24. Zhou, Y.; Zhou, B.; Pache, L.; Chang, M.; Khodabakhshi, A. H.; Tanaseichuk, O.; Benner, C.;  
1450 Chanda, S. K., Metascape provides a biologist-oriented resource for the analysis of systems-level  
1451 datasets. *Nature Communications* **2019**, *10* (1), 1523.

## SUPPLEMENTARY FIGURES

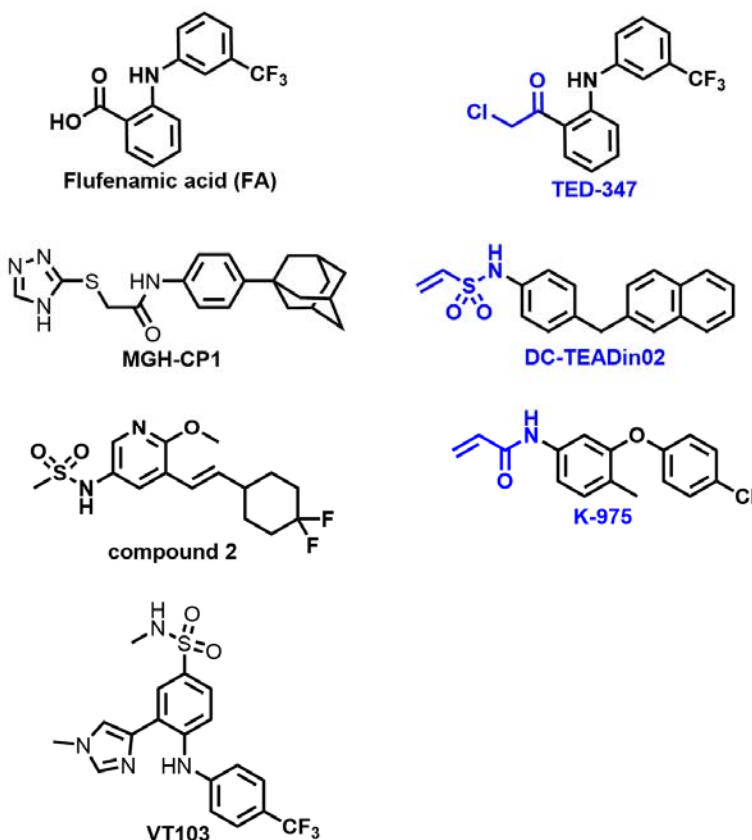

**Figure S1 | Chemical structures of known TEAD palmitate pocket binders.** Covalent binders are labeled in blue.

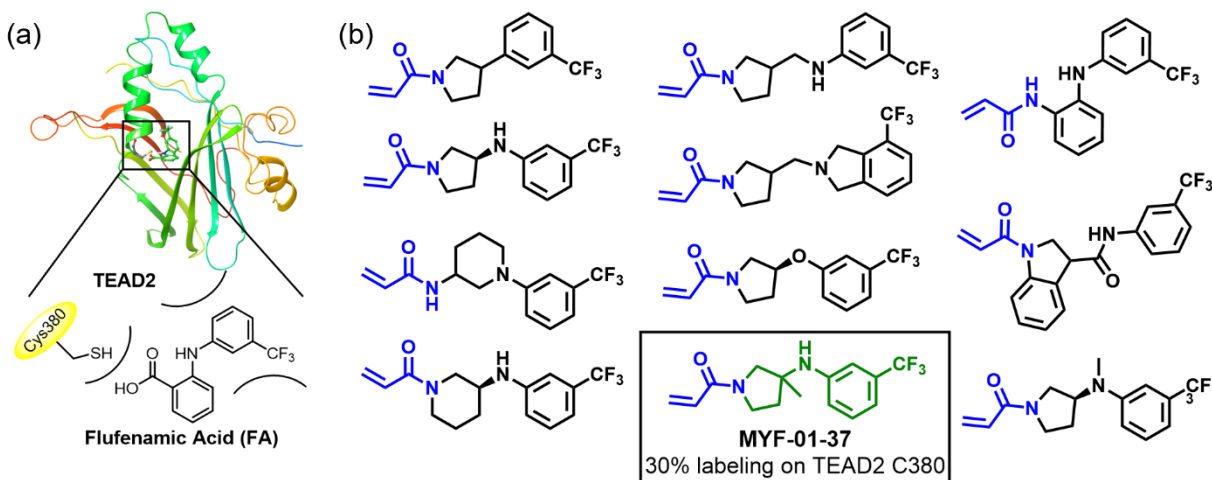

**Figure S2 | Rationale of covalent fragments design.** (a) Binding model of FA in TEAD2 palmitate pocket. (b) Chemical structures of representative covalent fragments. This figure is related to **Figure 1a**.

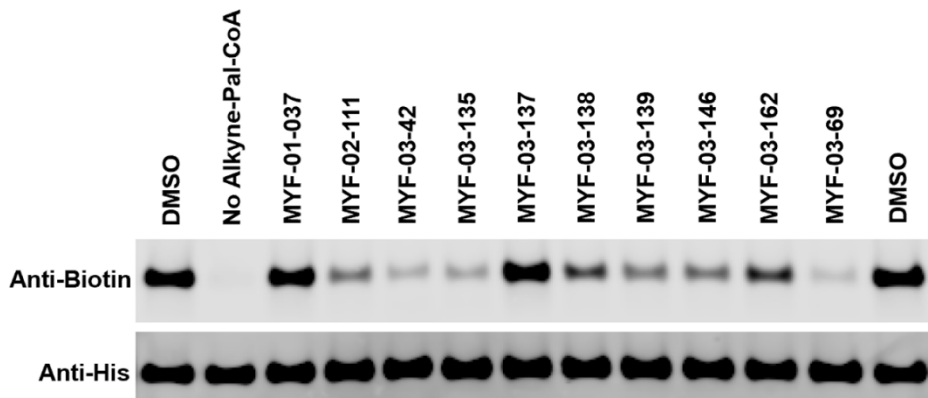

**Figure S3 | Original western blot image of palmitoylation assay in YBD protein of TEAD2.** This figure is related to **Figure 1d-e**.

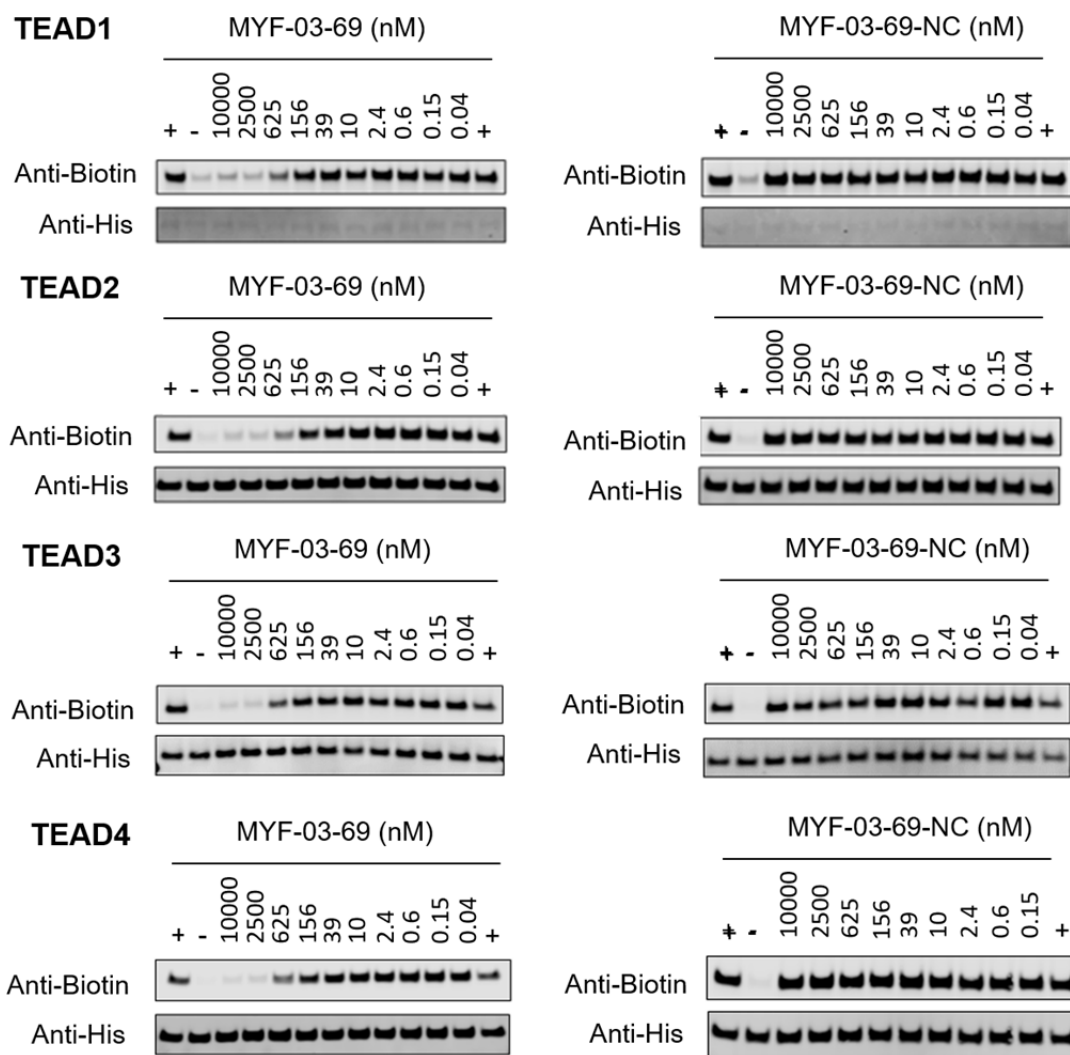

**Figure S4 | Original western blot images of palmitoylation assays in YBD protein of TEAD1-4.** This figure is related to **Figure 2e**.

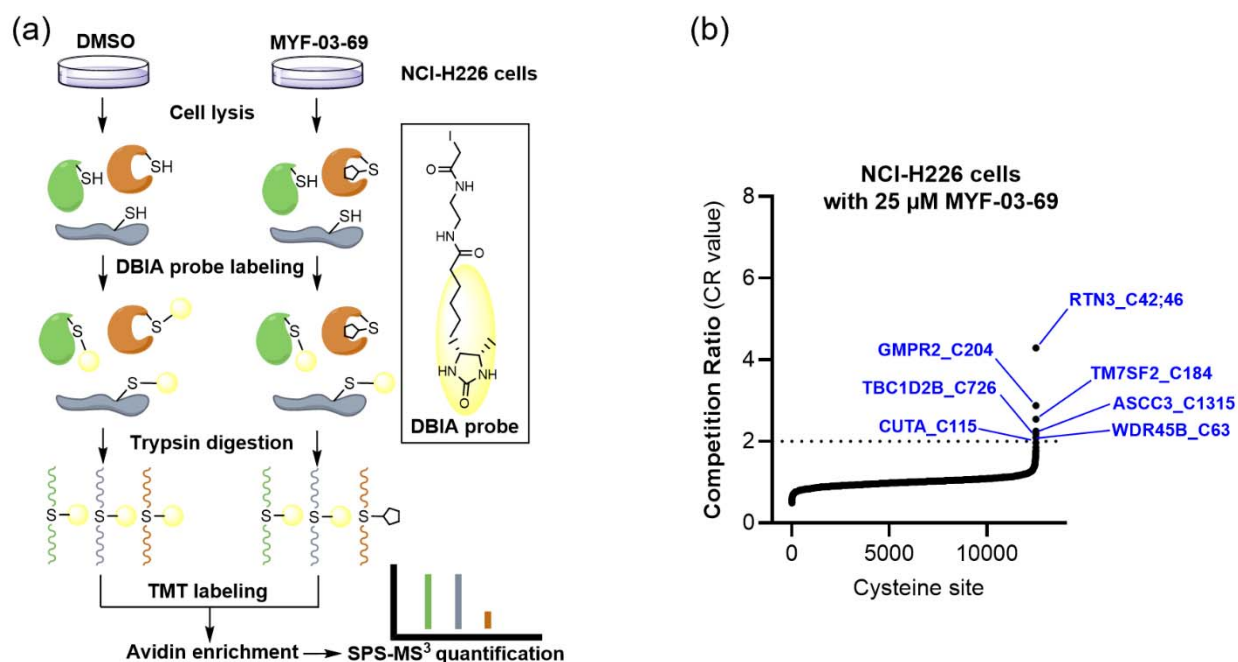

**Figure S5 | MYF-03-69 exhibited low reactivity towards the cysteine proteome.** (a) Overview of the SLC-ABPP proteome-wide selectivity approach for profiling of MYF-03-69. NCI-H226 cells were treated with 0.5, 2, 10 or 25  $\mu\text{M}$  MYF-03-69 and DMSO over 3 hours in triplicates before cell lysis followed by labeling with DBIA probe. The SLC-ABPP approach was used to profile competition of MYF-03-69 in proteome cysteine labeling. Competition ratio (CR) was calculated in order to quantitatively assess labeling at every cysteine residue. (b) The 7 cysteine sites that were significantly labeled (i.e. exhibited >50% conjugation or  $\text{CR} > 2$ ) by 25  $\mu\text{M}$  of MYF-03-69 are in blue, all of which exhibited dose-dependent engagement.

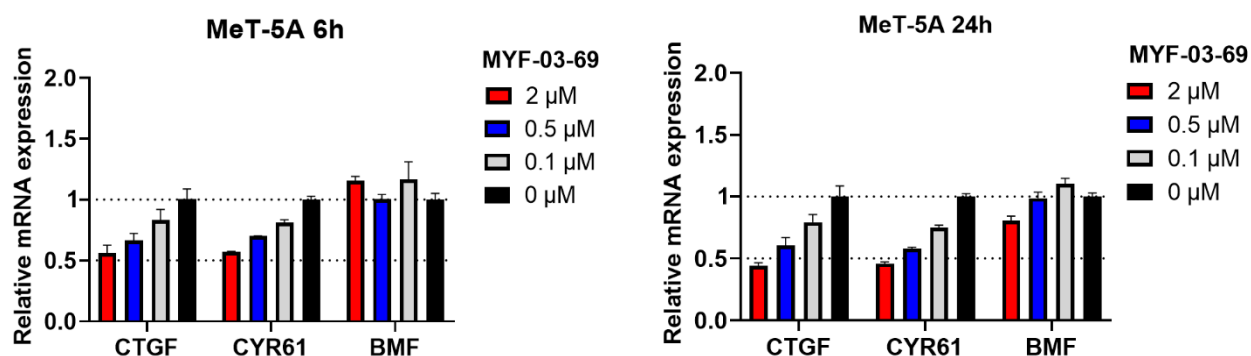

**Figure S6 | MYF-03-69 showed comparatively weak inhibition on YAP-TEAD downstream gene expression in normal mesothelium cell MeT-5A upon 6-hour and 24-hour treatment.** This figure is related to Figure 4b-c.

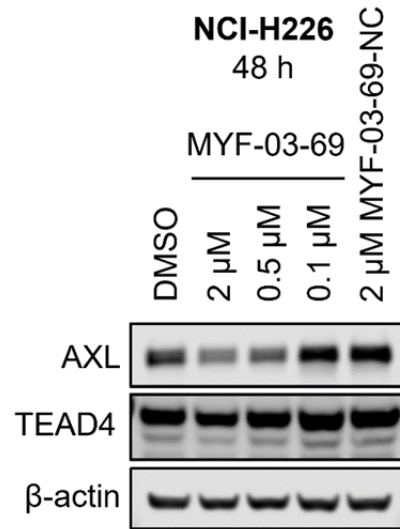

**Figure S7 | MYF-03-69 downregulated product of canonical YAP downstream gene AXL with minimal effect on TEAD stability.** This figure is related to **Figure 4d**.

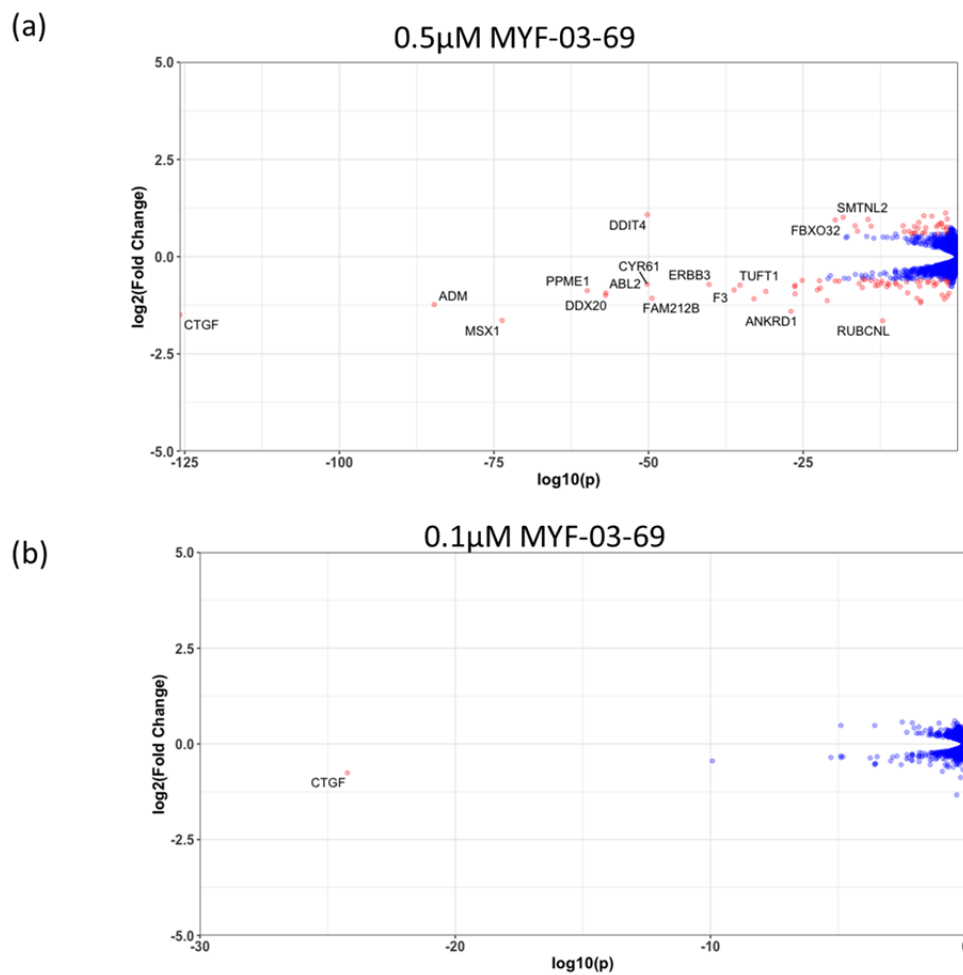

**Figure S8 | The number of genes with significantly altered expression level decreased with lower concentration treatment in NCI-H226 cells. (a) 0.5  $\mu$ M MYF-**



03-69, (b) 0.1  $\mu$ M MYF-03-69. This figure is related to **Figure 4e-f**. Details are in **Supplementary Dataset 2**.

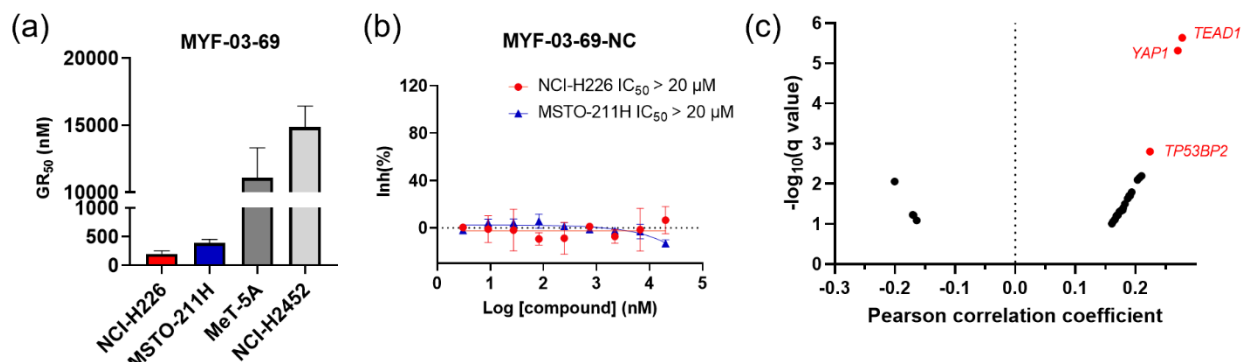

**Figure S9 | (a)** The calculated GR<sub>50</sub> values of MYF-03-69 in 5-day proliferation assay on mesothelioma cells. NCI-H226 and MSTO-211H are Hippo signaling defective mesothelioma cells. NCI-H2452 is Hippo signaling intact mesothelioma cell. MeT-5A is non-cancerous mesothelium cell. This figure is related to **Figure 5a**. **(b)** MYF-03-69-NC did not inhibit cell proliferation of NCI-H226 and MSTO-211H cells in 5-day treatment. This figure is related to **Figure 5a**. **(c)** Correlation analysis between compound PRISM sensitivity (log<sub>2</sub>.AUC of each cell line) and dependency of certain gene (CRISPR knockout score for each cell line, from DepMap Public 20Q4 Achilles\_gene\_effect.csv dataset) across the PRISM cell line panel. The Pearson correlation coefficients (X axis) and associated p-values were computed. Positive correlations correspond to dependency correlating with increased sensitivity. The q-values (a corrected significance value accounting for false discovery rate) are computed from p-values using the Benjamini Hochberg algorithm. Associations with q-values above 0.1 are filtered out. Top 3 correlated genes are in red. Details are in **Supplementary Dataset 4**.



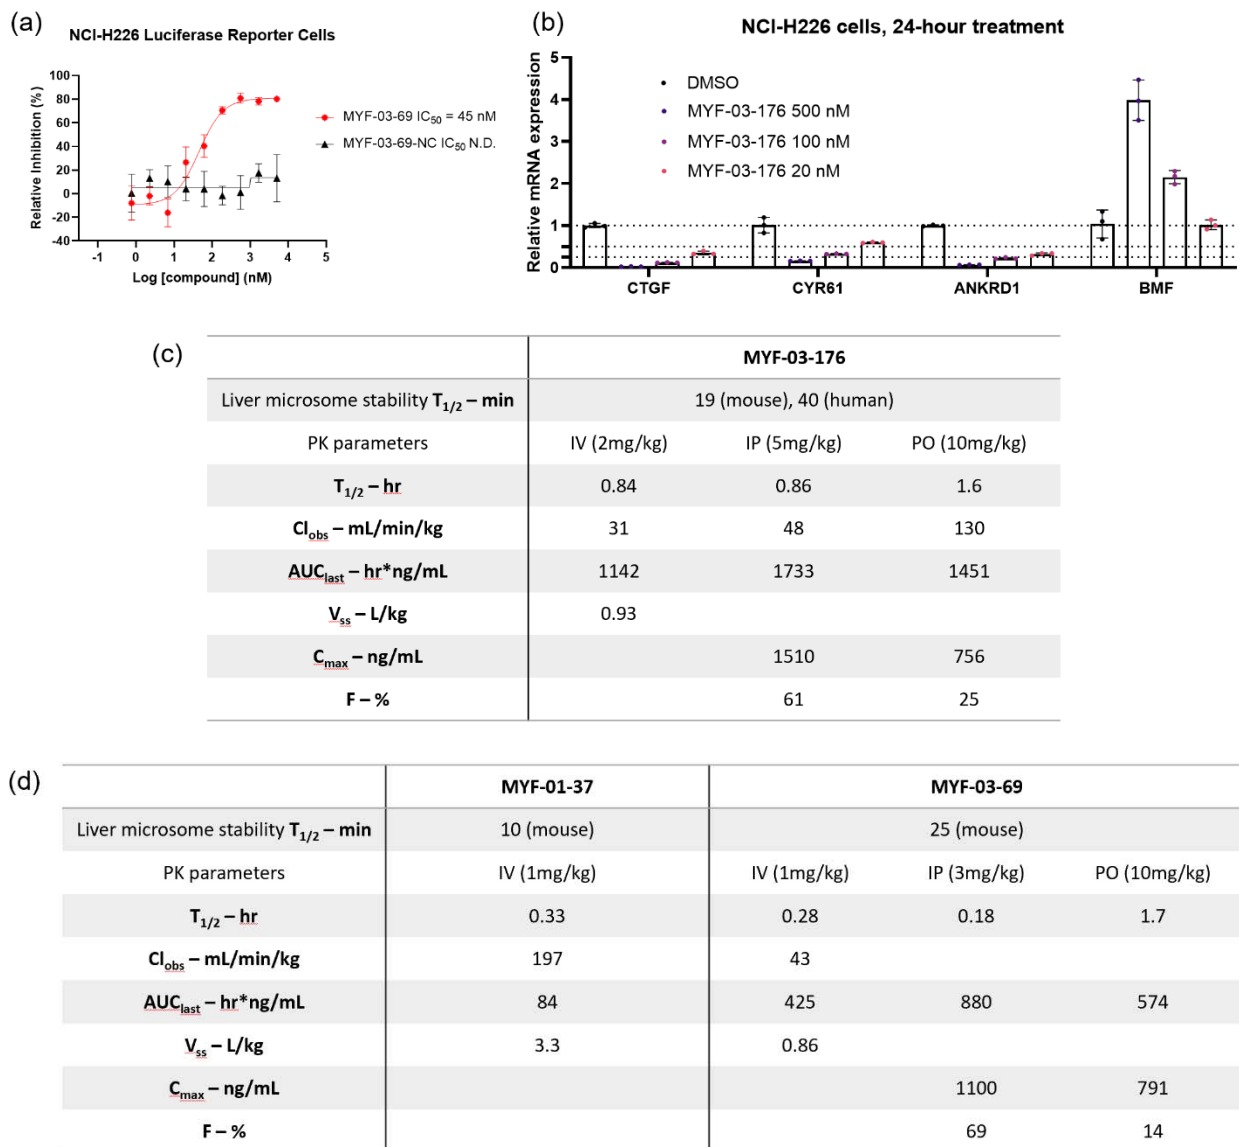

**Figure S10 | (a)** MYF-03-69, but not MYF-03-69-NC, inhibits YAP-TEAD transcriptional activity in NCI-H226 luciferase reporter cells. This figure is related to **Figure 6b-c**. **(b)** MYF-03-176 downregulates YAP target genes and upregulates a pro-apoptotic gene *BMF*. **(c-d)** Liver microsome stability and PK parameters comparison of MYF-03-176, MYF-03-69 and MYF-01-37.
